# Supplementary material for: Exploring gene-patient association to identify personalized cancer driver genes by linear neighborhood propagation
Source: BMC Bioinformatics. 2024 Jan 22;25:34. doi: 10.1186/s12859-024-05662-4 (PMC10804660; doi:10.1186/s12859-024-05662-4)
Supplement: Supplementary file 1 — Additional file 1: The gene interaction network. [file 12859_2024_5662_MOESM1_ESM.xlsx]

## Sheet: Description
Additional file 1. The gene interaction network
Description:We retrieved four available reference gene interaction networks including ConsensusPathDB, PNCNet, HumanNet and StringNet from the literatures [1], [2], [3], [4] and [5], respectively.
Reference:
1. Barel G, Herwig R. NetCore: a network propagation approach using node coreness. Nucleic Acids Research. 2020;48:e98-e.
2. Kamburov A, Wierling C, Lehrach H, Herwig R. ConsensusPathDB—a database for integrating human functional interaction networks. Nucleic Acids Research. 2008;37:D623-D8.
3. Guo W-F, Zhang S-W, Zeng T, Li Y, Gao J, Chen L. A novel network control model for identifying personalized driver genes in cancer. PLoS computational biology. 2019;15:e1007520.
4. Hwang S, Kim CY, Yang S, Kim E, Hart T, Marcotte EM, et al. HumanNet v2: human gene networks for disease research. Nucleic acids research. 2019;47:D573-D80.
5. Szklarczyk D, Franceschini A, Wyder S, Forslund K, Heller D, Huerta‑Cepas J, Simonovic M, Roth A, Santos A, Tsafou KP , et al. STRING v10: protein‑protein interaction networks, integrated over the tree of life. Nucleic Acids Res. 2015;43(1(Database issue)):D447‑452

## Sheet: ConsensusPathDB
geneA	geneB
A2M	AP1M2
A2M	APP
A2M	B2M
A2M	CDC37
A2M	CTSB
A2M	CXCL8
A2M	ELANE
A2M	ENO2
A2M	FGF2
A2M	HSPA5
A2M	IL1B
A2M	KIFAP3
A2M	KLK3
A2M	LGALS8
A2M	LGALS9
A2M	MLST8
A2M	NUDT21
A2M	PDGFB
A2M	SMN1
A2M	TGFB2
A2M	TGIF1
A2M	TP63
A2M	UMPS
AAAS	GNAI3
AAAS	IFI16
AAAS	NTRK1
AAAS	NUDC
AAAS	NUP107
AAAS	SEH1L
AAAS	SLC39A4
AAAS	XPO1
AAK1	AP2M1
AARS	ASNS
AARS	CACYBP
AARS	EEF2K
AARS	LARS
AARS	NARS
AARS	QARS
AARS	SRP9
AARS	WARS
AATF	ATM
AATF	BRIX1
AATF	BTRC
AATF	CHEK2
AATF	DDX52
AATF	DDX56
AATF	EBNA1BP2
AATF	KRR1
AATF	LIN28A
AATF	MAGED1
AATF	MAPKAPK2
AATF	MAPT
AATF	MDM2
AATF	MPHOSPH10
AATF	NOC2L
AATF	NOL6
AATF	PAWR
AATF	POLR2J
AATF	PUM3
AATF	RBL1
AATF	RELA
AATF	RTEL1
AATF	SMAD3
AATF	SS18L1
AATF	TBL3
AATF	TSG101
ABAT	BAG3
ABAT	FAHD1
ABAT	QDPR
ABCA1	APOA1
ABCA1	CANX
ABCA1	LIN7A
ABCA1	LIN7B
ABCA1	SDHB
ABCA1	SNTB2
ABCA1	SPTLC1
ABCA1	STX12
ABCA1	TRIM27
ABCA1	UGP2
ABCB7	ACAT1
ABCB7	COQ9
ABCB7	MRPL10
ABCB7	NDUFA4
ABCB7	NDUFB6
ABCB7	NTRK1
ABCB7	RPN1
ABCC1	ATP5A1
ABCC1	ATP6V1H
ABCC1	CANX
ABCC1	CAV1
ABCC1	ECHS1
ABCC1	NDUFB9
ABCC1	NOTCH1
ABCC1	PTGES3
ABCC1	SAFB
ABCD1	ABCD3
ABCD1	BSG
ABCD1	NTRK1
ABCD1	SLC27A2
ABCD3	CLN3
ABCD3	FAF2
ABCD3	GOLT1B
ABCD3	MRPL41
ABCD3	NDUFA4
ABCD3	NDUFB11
ABCD3	NDUFV1
ABCD3	NNT
ABCD3	PCM1
ABCD3	PEX14
ABCD3	SURF1
ABCD3	TIMMDC1
ABCD3	TOMM40
ABCD3	VAPA
ABCE1	ACAT1
ABCE1	AK2
ABCE1	CISD1
ABCE1	DUT
ABCE1	GADD45GIP1
ABCE1	IMMT
ABCE1	MAIP1
ABCE1	NDUFA5
ABCE1	NDUFAF4
ABCE1	SLC25A4
ABCE1	SUCLG2
ABCF1	C14orf166
ABCF1	COPS5
ABCF1	DDX1
ABCF1	DIMT1
ABCF1	EDC4
ABCF1	HNRNPA0
ABCF1	HNRNPM
ABCF1	HNRNPU
ABCF1	ILF2
ABCF1	MCM2
ABCF1	MMS19
ABCF1	MRE11
ABCF1	NELFB
ABCF1	PINX1
ABCF1	POU5F1
ABCF1	PSMC6
ABCF1	RFC4
ABCF1	RPL27A
ABCF1	SRPK1
ABCF1	TBL1XR1
ABCF1	UBXN7
ABCF2	FAF2
ABCF2	FBXO6
ABCF2	HNRNPA2B1
ABCF2	MTHFD1
ABCF2	POLR1C
ABCF2	PPP1R10
ABCF2	RPL6
ABCF2	UPF2
ABI1	ABL1
ABI1	CBLC
ABI1	CDH23
ABI1	CYFIP1
ABI1	CYFIP2
ABI1	ENAH
ABI1	ENKD1
ABI1	FER
ABI1	GAS7
ABI1	HOMER1
ABI1	LMO1
ABI1	MTTP
ABI1	PLCG1
ABI1	PPP2R1A
ABI1	RASA1
ABI1	RBM15
ABI1	SPTAN1
ABI1	SRC
ABI1	TCERG1
ABI2	ABI1
ABI2	ABL1
ABI2	CDK6
ABI2	CYFIP1
ABI2	GFAP
ABI2	KRT13
ABI2	KRT31
ABI2	KRT33B
ABI2	NCK2
ABI2	NCKAP1
ABI2	PDLIM7
ABI2	RAC1
ABI2	SH3KBP1
ABI2	STAM2
ABI2	VCL
ABI2	WASF1
ABI2	WASF2
ABL1	ABL2
ABL1	ACTA1
ABL1	AIRE
ABL1	AR
ABL1	ARHGEF11
ABL1	ATR
ABL1	BAG1
ABL1	BAZ2A
ABL1	BCAR1
ABL1	BCL2L1
ABL1	BIN1
ABL1	BMP2K
ABL1	BRCA2
ABL1	BTK
ABL1	CAT
ABL1	CBLB
ABL1	CD2AP
ABL1	CDK1
ABL1	CDKN1B
ABL1	CENPA
ABL1	CKAP4
ABL1	CKAP5
ABL1	CREB1
ABL1	CRKL
ABL1	CTNNB1
ABL1	DDB2
ABL1	DDX5
ABL1	DNM3
ABL1	DOK1
ABL1	ENAH
ABL1	EP300
ABL1	EPHA3
ABL1	ERBB2
ABL1	ERBB3
ABL1	ERBB4
ABL1	EVL
ABL1	FAM110A
ABL1	FGFR1OP
ABL1	FLNA
ABL1	FLNC
ABL1	FN1
ABL1	GRAP2
ABL1	GRB10
ABL1	GRB2
ABL1	HCK
ABL1	HNRNPM
ABL1	HSP90AB1
ABL1	HSPA8
ABL1	ILF3
ABL1	INPPL1
ABL1	JAK1
ABL1	JAK2
ABL1	JUN
ABL1	LRRC59
ABL1	MDM4
ABL1	MED14
ABL1	MUC1
ABL1	NCF1
ABL1	NCK1
ABL1	NCKIPSD
ABL1	NCOA3
ABL1	NEDD9
ABL1	NFS1
ABL1	ORC1
ABL1	PAX3
ABL1	PCNA
ABL1	PDE4D
ABL1	PFDN4
ABL1	PIK3R2
ABL1	PLCG1
ABL1	PLSCR1
ABL1	POLD1
ABL1	PPM1B
ABL1	PPP3CA
ABL1	PRKCA
ABL1	PRKCD
ABL1	PRKCZ
ABL1	PRKDC
ABL1	PSMA7
ABL1	PSMD4
ABL1	PTPN1
ABL1	PTPN12
ABL1	RAN
ABL1	RAPGEF1
ABL1	RPL37
ABL1	RPP38
ABL1	RTN4
ABL1	SF1
ABL1	SH3KBP1
ABL1	SNCA
ABL1	SNX17
ABL1	SOCS1
ABL1	SORBS2
ABL1	SORBS3
ABL1	SP1
ABL1	SPAG9
ABL1	SRPK2
ABL1	STAT5A
ABL1	STON2
ABL1	SUB1
ABL1	TERF1
ABL1	WASF1
ABL1	WASL
ABL1	XRCC6
ABL1	YWHAE
ABL1	YWHAG
ABL1	YWHAQ
ABL1	YWHAZ
ABL1	ZAP70
ABL2	ABI1
ABL2	ABI2
ABL2	BCR
ABL2	CDC37
ABL2	CTTN
ABL2	GRB2
ABL2	HRAS
ABL2	NCK1
ABL2	PIK3R3
ABL2	PSMA7
ABL2	RIN1
ABL2	SRC
ABLIM1	ACTG1
ABLIM1	ANLN
ABLIM1	CAPZA2
ABLIM1	CENPJ
ABLIM1	CEP128
ABLIM1	CEP89
ABLIM1	KRT15
ABLIM1	MYH9
ABLIM1	MYO19
ABLIM1	NINL
ABLIM1	ODF2
ABLIM1	SCLT1
ABT1	CAND1
ABT1	CDCA7L
ABT1	CEP70
ABT1	EMD
ABT1	HDAC6
ABT1	KRR1
ABT1	NAP1L5
ACAA1	CAT
ACAA1	HAT1
ACAA1	NDUFA2
ACAA1	PEX7
ACAA1	SCP2
ACAA2	ACAT1
ACAA2	ACO2
ACAA2	FKBP2
ACAA2	HSD17B10
ACAA2	MTIF2
ACAA2	RTN4
ACAA2	VDAC1
ACAA2	VDAC2
ACACA	AP2M1
ACACA	ARRB1
ACACA	CSNK1A1
ACACA	CSNK2A1
ACACA	CSNK2A2
ACACA	EEF2K
ACACA	GRK2
ACACA	IARS
ACACA	INPPL1
ACACA	PRKAA1
ACACA	PRKAG1
ACACA	VCP
ACAD9	ABCF2
ACAD9	DBT
ACAD9	DLAT
ACAD9	MRPL58
ACAD9	NDUFA13
ACAD9	NDUFA2
ACAD9	NDUFAF3
ACAD9	NDUFAF4
ACAD9	NDUFS2
ACAD9	NMES1
ACAD9	UQCRFS1P1
ACADM	ETFA
ACADM	ETFB
ACADM	GALE
ACADM	HDAC1
ACADM	HIBCH
ACADM	LDHA
ACADM	LDHB
ACADM	SLC25A3
ACADM	SUCLA2
ACADM	VDAC2
ACADVL	ATP5L
ACADVL	HIBCH
ACADVL	HMGCL
ACADVL	IFI16
ACADVL	KIF2A
ACADVL	MRM1
ACADVL	NDUFA4
ACADVL	NTRK1
ACADVL	OXLD1
ACADVL	PPA2
ACAT1	ACO2
ACAT1	CUL1
ACAT1	ERCC1
ACAT1	FOXM1
ACAT1	HDAC5
ACAT1	HLA-B
ACAT1	HLA-C
ACAT1	MPG
ACAT1	SDHA
ACAT1	SFPQ
ACAT1	SFXN1
ACAT1	SFXN3
ACAT1	TIMM44
ACAT1	TOMM7
ACAT1	TTF2
ACAT1	UQCRFS1P1
ACAT1	UQCRQ
ACAT2	ACAT1
ACAT2	CCNA1
ACAT2	CSNK2A1
ACAT2	HADH
ACAT2	PFDN4
ACAT2	TERF1
ACAT2	UBA3
ACAT2	VDAC1
ACAT2	YWHAE
ACD	POT1
ACD	SBDS
ACD	STN1
ACD	TERT
ACD	TINF2
ACD	TUBB2A
ACD	TUBB4B
ACD	UBC
ACD	UPF1
ACD	USP7
ACD	XPO1
ACIN1	BMI1
ACIN1	BOP1
ACIN1	CASP7
ACIN1	CASP8
ACIN1	CLK2
ACIN1	DDX17
ACIN1	DHX9
ACIN1	EED
ACIN1	EIF4A3
ACIN1	HDAC11
ACIN1	HIST1H3A
ACIN1	HNRNPA1
ACIN1	IFI16
ACIN1	LUC7L
ACIN1	LUZP4
ACIN1	PRKCA
ACIN1	PRPF40A
ACIN1	PRPF6
ACIN1	PYM1
ACIN1	RBM39
ACIN1	RCC1
ACIN1	RNPS1
ACIN1	RPL7
ACIN1	SENP3
ACIN1	SNW1
ACIN1	SON
ACIN1	SRRM1
ACIN1	SSRP1
ACIN1	SUPT16H
ACIN1	SUZ12
ACIN1	U2AF2
ACIN1	YWHAB
ACIN1	ZC3H18
ACLY	ATF6
ACLY	CRY2
ACLY	CS
ACLY	CTH
ACLY	CUL3
ACLY	GSK3B
ACLY	KAT2B
ACLY	KPNA2
ACLY	NCL
ACLY	NME2
ACLY	PRKAB1
ACLY	PRKACA
ACLY	PRMT1
ACLY	RPE
ACLY	SDHA
ACLY	SHC1
ACLY	TRIM25
ACLY	VHL
ACO2	ALDH5A1
ACO2	ALDOA
ACO2	ALDOC
ACO2	ATP5J
ACO2	IDH3G
ACO2	MED6
ACO2	PSMD4
ACOX1	GRHPR
ACOX1	MCM2
ACOX1	NUP62
ACOX1	PEX14
ACOX1	PEX5
ACOX1	SCP2
ACOX1	TMED9
ACP1	CTNNB1
ACP1	EPHA2
ACP1	FYN
ACP1	INSR
ACP1	LCK
ACP1	SFMBT1
ACP1	SPTAN1
ACP1	TALDO1
ACP1	TKT
ACP1	ZAP70
ACSL4	COQ9
ACSL4	EDEM1
ACSL4	MINOS1
ACSL4	MRPS15
ACSL4	SH3GLB1
ACSL4	TP53
ACTA1	ACTR10
ACTA1	ADSS
ACTA1	AFAP1
ACTA1	ARRB1
ACTA1	CAPZA2
ACTA1	CBL
ACTA1	CCT2
ACTA1	CCT4
ACTA1	CDK2
ACTA1	CEP57
ACTA1	CFL1
ACTA1	CSNK1A1
ACTA1	CTTN
ACTA1	CUL1
ACTA1	DHX9
ACTA1	DMD
ACTA1	DNMBP
ACTA1	EPB41
ACTA1	FHOD1
ACTA1	FSCN1
ACTA1	GSN
ACTA1	HDAC1
ACTA1	HDAC4
ACTA1	HDAC8
ACTA1	HIP1R
ACTA1	KIF23
ACTA1	LASP1
ACTA1	MARK4
ACTA1	MCM2
ACTA1	MORF4L1
ACTA1	MORF4L2
ACTA1	MYO18A
ACTA1	NEXN
ACTA1	PAK1
ACTA1	PFDN1
ACTA1	PFN1
ACTA1	PLD1
ACTA1	POLR1B
ACTA1	PPP1CA
ACTA1	PPP1CB
ACTA1	RAC1
ACTA1	RELA
ACTA1	RRN3
ACTA1	SMARCB1
ACTA1	SMARCD1
ACTA1	SNCA
ACTA1	SORBS1
ACTA1	SPTA1
ACTA1	SRC
ACTA1	TNNI1
ACTA1	TP53
ACTA1	TPM2
ACTA1	TRAF3IP1
ACTA1	TRIM55
ACTA1	TRIP6
ACTA1	TSC1
ACTA1	TTN
ACTA1	UBE3A
ACTA1	UBL4A
ACTA1	UTRN
ACTA1	VCL
ACTA1	VIM
ACTA2	ACTC1
ACTA2	ACTN2
ACTA2	CFL1
ACTA2	CREBBP
ACTA2	CUL1
ACTA2	CUL3
ACTA2	MAP3K3
ACTA2	MYH10
ACTA2	MYH11
ACTA2	RPL14
ACTA2	RPL17
ACTA2	RPL7A
ACTA2	RPS15A
ACTA2	RPS23
ACTA2	TFAP2A
ACTA2	TMSB4X
ACTA2	YWHAB
ACTA2	YWHAE
ACTA2	YWHAQ
ACTB	ABLIM1
ACTB	ACD
ACTB	ACTG1
ACTB	ACTN1
ACTB	ACTN3
ACTB	ACTR3
ACTB	ADRM1
ACTB	AGO4
ACTB	AKT1
ACTB	ALOX5
ACTB	AMOT
ACTB	ANXA2
ACTB	APP
ACTB	ATF3
ACTB	BAIAP2
ACTB	BBS1
ACTB	BBS4
ACTB	BCAR1
ACTB	CAD
ACTB	CAP1
ACTB	CBL
ACTB	CCT4
ACTB	CD4
ACTB	CENPA
ACTB	CFL1
ACTB	CHUK
ACTB	CLIC4
ACTB	CLNS1A
ACTB	CORO1A
ACTB	CRK
ACTB	CSNK1A1
ACTB	CSNK2B
ACTB	CUL1
ACTB	CYBB
ACTB	DAB2
ACTB	DDX3X
ACTB	DHX9
ACTB	DMAP1
ACTB	EEF1A1
ACTB	EEF1A2
ACTB	EEF1B2
ACTB	EGFR
ACTB	EIF3C
ACTB	EIF3E
ACTB	EIF3K
ACTB	EIF4A2
ACTB	EIF4A3
ACTB	EMD
ACTB	EPB41L3
ACTB	EPS15
ACTB	ERBB2
ACTB	ERBB3
ACTB	ERG
ACTB	EZR
ACTB	FARSB
ACTB	FBL
ACTB	FHOD1
ACTB	FLOT2
ACTB	FN1
ACTB	GNA12
ACTB	HAUS1
ACTB	HDAC6
ACTB	HNRNPAB
ACTB	HNRNPU
ACTB	HOXB5
ACTB	HSP90AA1
ACTB	IKBKB
ACTB	IKBKE
ACTB	IKBKG
ACTB	IQGAP1
ACTB	IVNS1ABP
ACTB	KAT2B
ACTB	KAT5
ACTB	LASP1
ACTB	LMX1B
ACTB	LRPPRC
ACTB	MAGOH
ACTB	MAP1B
ACTB	MAP3K14
ACTB	MAP3K3
ACTB	MAP3K7
ACTB	MAPK7
ACTB	MAPT
ACTB	MCL1
ACTB	MORF4L1
ACTB	MYC
ACTB	MYH9
ACTB	MYL12B
ACTB	MYL6
ACTB	NCL
ACTB	NCOA6
ACTB	NFKB2
ACTB	NFKBIA
ACTB	NOS2
ACTB	NOS3
ACTB	PCK1
ACTB	PFDN1
ACTB	PFDN4
ACTB	PFN1
ACTB	PIK3R2
ACTB	PLCG1
ACTB	PLD2
ACTB	PLG
ACTB	POLR1B
ACTB	POLR2A
ACTB	POT1
ACTB	PPP1CB
ACTB	PPP1CC
ACTB	PRKCD
ACTB	PTPRO
ACTB	RAC2
ACTB	RACK1
ACTB	RAD51
ACTB	RAN
ACTB	RCC1
ACTB	RDX
ACTB	RPA1
ACTB	RPA2
ACTB	RPA3
ACTB	RPL10A
ACTB	RPL18
ACTB	RPL7
ACTB	RPL7A
ACTB	RPLP0
ACTB	RPLP1
ACTB	RPS18
ACTB	RPS19
ACTB	RPS24
ACTB	RPS3A
ACTB	RPS4X
ACTB	RPS8
ACTB	RUVBL2
ACTB	SMARCA4
ACTB	SMARCE1
ACTB	SMN1
ACTB	SMURF1
ACTB	SNCA
ACTB	SRC
ACTB	SSH2
ACTB	STAU1
ACTB	TINF2
ACTB	TJP1
ACTB	TMSB4X
ACTB	TRADD
ACTB	TUBB
ACTB	TUBG1
ACTB	TUBGCP2
ACTB	UBL4A
ACTB	UCHL5
ACTB	VCAM1
ACTB	VDAC2
ACTB	VHL
ACTB	WASF2
ACTB	YWHAZ
ACTC1	ACTB
ACTC1	ACTN4
ACTC1	ACTR2
ACTC1	ARRB2
ACTC1	ASH2L
ACTC1	DMD
ACTC1	EIF4A3
ACTC1	EZR
ACTC1	HSPB2
ACTC1	LASP1
ACTC1	MCM2
ACTC1	MYBPC3
ACTC1	MYH10
ACTC1	MYLK
ACTC1	PLEC
ACTC1	PRKCE
ACTC1	SLC4A1
ACTC1	SMARCA4
ACTC1	SP1
ACTC1	SYNE1
ACTC1	SYNE2
ACTC1	TADA2A
ACTC1	TLN1
ACTC1	TRAF3IP1
ACTC1	TWF1
ACTC1	UCHL5
ACTC1	VCL
ACTG1	ACTA1
ACTG1	ANLN
ACTG1	APOE
ACTG1	BRCA1
ACTG1	CAD
ACTG1	CFL2
ACTG1	CORO1B
ACTG1	FBXO6
ACTG1	FHOD1
ACTG1	FLNA
ACTG1	GIT2
ACTG1	GRB2
ACTG1	GSN
ACTG1	HSP90AA1
ACTG1	HSP90AB1
ACTG1	HSPA5
ACTG1	HSPB2
ACTG1	IKBKB
ACTG1	IKBKG
ACTG1	IQGAP1
ACTG1	ITGB3BP
ACTG1	MAP1A
ACTG1	MAP3K1
ACTG1	MAP3K7
ACTG1	MCM2
ACTG1	MPRIP
ACTG1	MYO18A
ACTG1	MYO1C
ACTG1	NCF1
ACTG1	NDRG1
ACTG1	NFKB2
ACTG1	PDLIM7
ACTG1	PFN2
ACTG1	PLD1
ACTG1	PPP1CB
ACTG1	PTPRO
ACTG1	PXN
ACTG1	RAN
ACTG1	RBX1
ACTG1	RC3H1
ACTG1	RIPK1
ACTG1	RIPK2
ACTG1	RNF2
ACTG1	RPS6KA5
ACTG1	TAB2
ACTG1	TLN1
ACTG1	TNFRSF1A
ACTG1	TNIK
ACTG1	TOPBP1
ACTG1	TRAF3IP1
ACTG1	UCHL5
ACTG1	WASL
ACTG1	YWHAQ
ACTL6A	ACTR5
ACTL6A	ARID1A
ACTL6A	ARID1B
ACTL6A	ATM
ACTL6A	BMI1
ACTL6A	CBX5
ACTL6A	CCT2
ACTL6A	CYB5R3
ACTL6A	DMAP1
ACTL6A	DPF2
ACTL6A	EP400
ACTL6A	EPC2
ACTL6A	FLII
ACTL6A	FOXN1
ACTL6A	GRB2
ACTL6A	H2AFZ
ACTL6A	HDGFL2
ACTL6A	HDLBP
ACTL6A	HINT1
ACTL6A	HIST1H3A
ACTL6A	ING2
ACTL6A	INO80
ACTL6A	INO80D
ACTL6A	INO80E
ACTL6A	KAT5
ACTL6A	MAP2K2
ACTL6A	MORF4L1
ACTL6A	NFATC1
ACTL6A	NFATC2
ACTL6A	NTRK1
ACTL6A	RELA
ACTL6A	RELB
ACTL6A	RUVBL1
ACTL6A	RUVBL2
ACTL6A	SF1
ACTL6A	SMARCA4
ACTL6A	SMARCAD1
ACTL6A	SMARCE1
ACTL6A	SS18
ACTL6A	TBL1XR1
ACTL6A	TCP1
ACTL6A	TFPT
ACTL6A	UBC
ACTL6A	VPS72
ACTL6A	YEATS4
ACTL6B	ATM
ACTL6B	CDKN1A
ACTL6B	CSNK2B
ACTL6B	CTBP1
ACTL6B	GSK3B
ACTL6B	HIST1H2BA
ACTL6B	SMARCD1
ACTL6B	YEATS4
ACTN1	ACTN2
ACTN1	ACTN4
ACTN1	APC
ACTN1	ATXN2
ACTN1	CACNA1A
ACTN1	CALD1
ACTN1	CAPZA2
ACTN1	CDH1
ACTN1	CDK5R1
ACTN1	CLU
ACTN1	CTNNA1
ACTN1	DAG1
ACTN1	ERBIN
ACTN1	EXOC3
ACTN1	EXOC7
ACTN1	EZR
ACTN1	GIPC1
ACTN1	HSP90AA1
ACTN1	ICAM1
ACTN1	IQGAP1
ACTN1	ITGB1
ACTN1	KAT2B
ACTN1	MAP1B
ACTN1	MAP3K1
ACTN1	MYH2
ACTN1	PDLIM7
ACTN1	PPP1CB
ACTN1	PSEN1
ACTN1	PTK2
ACTN1	SCRIB
ACTN1	SLC2A4
ACTN1	SRC
ACTN1	SYNPO
ACTN1	TJP1
ACTN1	TPM2
ACTN1	TTN
ACTN1	TUBA1A
ACTN1	USP2
ACTN1	ZYX
ACTN2	ACTB
ACTN2	ACTN4
ACTN2	BAD
ACTN2	CAMK2G
ACTN2	DLG1
ACTN2	DLG4
ACTN2	DYSF
ACTN2	ERBIN
ACTN2	GRB2
ACTN2	GRIN1
ACTN2	GRIN2B
ACTN2	MYH1
ACTN2	MYH2
ACTN2	MYOM2
ACTN2	PKD2
ACTN2	PPP1R12A
ACTN2	PSMA6
ACTN2	SP100
ACTN2	SSX2IP
ACTN2	TPM1
ACTN2	TPM2
ACTN2	TPM4
ACTN2	TTC8
ACTN2	TUBA4A
ACTN2	TULP3
ACTN2	UBE2I
ACTN2	YWHAQ
ACTN2	ZYX
ACTN3	ACTN1
ACTN3	ACTN2
ACTN3	BRCA1
ACTN3	DLG4
ACTN3	ITGB1
ACTN3	SH3KBP1
ACTN3	TRAF1
ACTN3	TRAF2
ACTN4	ACTN3
ACTN4	AHNAK
ACTN4	CAMK2G
ACTN4	CAPZA2
ACTN4	CDH1
ACTN4	CTNNB1
ACTN4	DBN1
ACTN4	EGFR
ACTN4	GNB2
ACTN4	GSN
ACTN4	HGS
ACTN4	HSPB1
ACTN4	IQGAP1
ACTN4	ITGB1
ACTN4	LIMA1
ACTN4	LUZP4
ACTN4	MAP3K3
ACTN4	MAPK7
ACTN4	MAPRE1
ACTN4	MCFD2
ACTN4	MCM2
ACTN4	MYH2
ACTN4	MYO5C
ACTN4	NCAPG2
ACTN4	NFKB1
ACTN4	POT1
ACTN4	PPP1CB
ACTN4	PSMA6
ACTN4	RELA
ACTN4	RPS27
ACTN4	SERPINE1
ACTN4	SIRT7
ACTN4	SLC2A4
ACTN4	STAT1
ACTN4	TFAP2C
ACTN4	TPM1
ACTN4	TPM4
ACTN4	TTN
ACTN4	UCHL5
ACTN4	VCAM1
ACTN4	WAS
ACTR10	ACTR1B
ACTR10	CAPZA2
ACTR10	CSPP1
ACTR10	DCTN2
ACTR10	DCTN3
ACTR10	DCTN4
ACTR10	KIF11
ACTR10	LMNB1
ACTR10	ORC6
ACTR1A	ACTR10
ACTR1A	ACTR1B
ACTR1A	BICD2
ACTR1A	CAPZA2
ACTR1A	CDC45
ACTR1A	CUL1
ACTR1A	DCTN1
ACTR1A	DCTN2
ACTR1A	DCTN5
ACTR1A	HDAC6
ACTR1A	KPNA3
ACTR1A	KPNA4
ACTR1A	LMNB1
ACTR1A	MYCBP
ACTR1A	MYH9
ACTR1A	NIN
ACTR1A	NUMA1
ACTR1A	SNW1
ACTR1A	SPTBN1
ACTR1A	SPTBN2
ACTR1A	UBC
ACTR1B	ACTA1
ACTR1B	CCT4
ACTR1B	CSPP1
ACTR1B	DCTN1
ACTR1B	DCTN5
ACTR1B	LMNB1
ACTR1B	SCYL1
ACTR2	ACTB
ACTR2	ARPC1A
ACTR2	ARPC5L
ACTR2	CAPZA1
ACTR2	CAPZA2
ACTR2	CCT5
ACTR2	CCT8
ACTR2	CEP128
ACTR2	CEP170
ACTR2	CFL1
ACTR2	CLTA
ACTR2	CORO1A
ACTR2	CORO1B
ACTR2	CTTN
ACTR2	CUL7
ACTR2	EGFR
ACTR2	EVC2
ACTR2	FAM98B
ACTR2	GRB2
ACTR2	MYH9
ACTR2	MYO18A
ACTR2	OGT
ACTR2	PCM1
ACTR2	RPA1
ACTR2	RPRD1B
ACTR2	SNW1
ACTR2	STIL
ACTR2	SYNPO
ACTR2	UBE2N
ACTR2	WAS
ACTR2	ZPR1
ACTR3	ACTR2
ACTR3	ARPC1A
ACTR3	ARPC2
ACTR3	ARPC3
ACTR3	ARPC5L
ACTR3	CAPZA2
ACTR3	CDH1
ACTR3	CORO1C
ACTR3	CTTN
ACTR3	GRB2
ACTR3	JUND
ACTR3	LRRK2
ACTR3	MYO18A
ACTR3	MYO19
ACTR3	NTRK1
ACTR3	PPP1CB
ACTR3	PPP1R12A
ACTR3	PRKACB
ACTR3	RPA1
ACTR3	UBE3A
ACTR3	WAS
ACTR3	WASL
ACTR3	XPO1
ACTR3B	ACTR2
ACTR5	H2AFX
ACTR5	INO80
ACTR5	INO80D
ACTR5	INTS7
ACTR5	MCRS1
ACTR5	RUVBL1
ACTR5	RUVBL2
ACTR8	ACTL6A
ACTR8	ACTR5
ACTR8	INO80B
ACTR8	INO80D
ACTR8	INO80E
ACTR8	RUVBL2
ACTR8	YY1
ACVR1	ACVRL1
ACVR1	INHBA
ACVR1	NRAS
ACVR1	SMAD7
ACVR1	TGFBR1
ACVR2A	ACVR1
ACVR2A	ACVR2B
ACVR2A	ACVRL1
ACVR2A	ENG
ACVR2A	ERBIN
ACVR2A	INHBA
ACVR2A	PLSCR1
ACVR2A	TGFBR2
ACVR2A	TGFBR3
ACVR2B	ACVR1
ACVR2B	BMP2
ACVR2B	TGFBR2
ACVRL1	ACVR2B
ACVRL1	FKBP1A
ACVRL1	ITGA5
ACVRL1	TGFB3
ACVRL1	TGFBR2
ADAM10	DLG1
ADAM10	GRB2
ADAM10	MAD2L1
ADAM10	PDIA3
ADAM15	MAPK3
ADAM15	NCK1
ADAM15	SH3PXD2A
ADAM15	SNX9
ADAM15	SORBS1
ADAM17	ATP6V0A4
ADAM17	EPHB2
ADAM17	FHL2
ADAM17	ITGB1
ADAM17	MAD2L1
ADAM17	MAPK3
ADAM17	TNFRSF1A
ADAM17	TNFRSF1B
ADAM9	CDH1
ADAM9	ITGA3
ADAM9	ITGB5
ADAM9	PTPRK
ADAM9	SH3GL2
ADAM9	TMEM25
ADAMTS1	A2M
ADAMTS1	FURIN
ADAR	CUL7
ADAR	DDX17
ADAR	DHX9
ADAR	EGR1
ADAR	EZH2
ADAR	FBXW11
ADAR	FOXA2
ADAR	FOXI2
ADAR	FOXL1
ADAR	FOXS1
ADAR	HDAC5
ADAR	HNRNPM
ADAR	IFI16
ADAR	MATR3
ADAR	MYC
ADAR	RPA1
ADAR	RPA2
ADAR	SMC2
ADAR	STAU2
ADAR	TARBP2
ADAR	TARDBP
ADAR	UBE2I
ADAR	UPF1
ADAR	XPO1
ADARB1	BMI1
ADARB1	EBNA1BP2
ADARB1	HNRNPA1
ADARB1	LRPPRC
ADARB1	PIN1
ADARB1	SDAD1
ADARB1	TCEANC
ADARB1	TCF20
ADCK1	ATP5O
ADCK1	CHCHD3
ADCK1	ECH1
ADCK1	IMMT
ADCK1	MTX1
ADCK1	PMPCB
ADCY5	CAV1
ADCY5	GNAI1
ADCY5	GNAI3
ADCY5	GNAS
ADCY5	GNAZ
ADCY5	PRKCA
ADD1	ADD3
ADD1	ATP1A1
ADD1	CAPZA2
ADD1	CSNK2B
ADD1	DPPA4
ADD1	DST
ADD1	DYNC1I2
ADD1	DYNLT1
ADD1	GEMIN7
ADD1	HMG20A
ADD1	LRWD1
ADD1	MAP1LC3B
ADD1	MMS19
ADD1	MYO1C
ADD1	NES
ADD1	PRKACA
ADD1	PRKCA
ADD1	ROCK2
ADD1	RPA1
ADD1	RPA3
ADD1	SIN3A
ADD1	SMARCA4
ADD1	SMARCC1
ADD1	SPTB
ADD1	SVIL
ADD1	TMOD1
ADD1	TPM2
ADD1	TPM4
ADD1	XPO1
ADD3	CAPZA2
ADD3	HDAC8
ADD3	SYNPO
ADD3	UBE2I
ADORA1	GNAZ
ADORA1	GRM1
ADRA2A	GNAI1
ADRA2A	GNAI3
ADRA2A	GNAO1
ADRA2A	GNB2
ADRA2A	GRK2
ADRB2	AIFM1
ADRB2	ALDH3A2
ADRB2	ARRB2
ADRB2	CANX
ADRB2	CD9
ADRB2	CEACAM1
ADRB2	CUL2
ADRB2	EIF2B1
ADRB2	GNA14
ADRB2	GNA15
ADRB2	GNB1
ADRB2	GNB4
ADRB2	GNG12
ADRB2	GRK2
ADRB2	GRK5
ADRB2	HGS
ADRB2	HLA-C
ADRB2	HSPA8
ADRB2	HSPD1
ADRB2	IGF1R
ADRB2	KPNB1
ADRB2	LAMP2
ADRB2	MDM2
ADRB2	NOS1
ADRB2	PC
ADRB2	PHB
ADRB2	PRKCA
ADRB2	PRKCD
ADRB2	RAB27A
ADRB2	RAB3A
ADRB2	RAN
ADRB2	REL
ADRB2	RGS20
ADRB2	RPN1
ADRB2	SLC25A13
ADRB2	SLC25A5
ADRB2	SLC9A3R1
ADRB2	STOM
ADRB2	TARDBP
ADRB2	TSHR
ADRB2	UBB
ADRB2	UCHL1
ADRB2	VCP
ADRM1	BIRC2
ADRM1	HBP1
ADRM1	PSMA1
ADRM1	PSMA3
ADRM1	PSMA6
ADRM1	PSMB2
ADRM1	PSMB5
ADRM1	PSMC1
ADRM1	PSMC3
ADRM1	PSMC4
ADRM1	PSMC5
ADRM1	PSMC6
ADRM1	PSMD1
ADRM1	PSMD11
ADRM1	PSMD13
ADRM1	PSMD2
ADRM1	PSMD4
ADRM1	PSMD6
ADRM1	PSMD8
ADRM1	PSME1
ADRM1	RAD23B
ADRM1	RPN1
ADRM1	UBC
ADRM1	UBE3A
ADRM1	UBQLN1
ADRM1	USP14
ADSL	ABAT
ADSL	ATIC
ADSL	DNAJB1
ADSL	LDHB
ADSL	PAICS
ADSL	PFAS
ADSL	TYMS
ADSL	XPNPEP1
ADSS	ARFIP1
ADSS	CHMP4A
ADSS	GSR
ADSS	IKBKE
ADSS	NME2
ADSS	OAT
ADSS	PCBD1
ADSS	PFKL
ADSS	UMPS
AEBP2	EED
AEBP2	EZH2
AEBP2	HIST1H1A
AEBP2	JMJD6
AEBP2	RBBP7
AEBP2	THAP1
AEBP2	TSPYL2
AEN	EMD
AEN	EXOSC8
AEN	HOMEZ
AEN	KRTAP10-1
AEN	KRTAP10-3
AEN	KRTAP10-7
AEN	KRTAP10-8
AEN	PHC2
AEN	TRIM27
AES	AEN
AES	ATXN1L
AES	BAHD1
AES	BCL6
AES	BHLHE40
AES	BYSL
AES	CALCOCO2
AES	EAF1
AES	EAF2
AES	EIF1AD
AES	FOXN1
AES	GATA1
AES	GFI1B
AES	GRB2
AES	HDAC3
AES	HGS
AES	HMGB1
AES	HNF1A
AES	HNRNPK
AES	HOMEZ
AES	HOXA1
AES	HOXC9
AES	IKZF3
AES	INO80E
AES	LDOC1
AES	LHX3
AES	LMO4
AES	MAPK14
AES	MBNL1
AES	MCRS1
AES	MED31
AES	MORF4L1
AES	MSX1
AES	MVP
AES	NAF1
AES	NEK6
AES	PHF1
AES	POU2F1
AES	PRKAA2
AES	PRKAB2
AES	PROP1
AES	RBM10
AES	REL
AES	RFX6
AES	SCNM1
AES	SDCBP
AES	SF3B4
AES	SIX1
AES	SKIL
AES	SMAD3
AES	SNRPA
AES	SNRPC
AES	SRPK2
AES	SUFU
AES	SUPT5H
AES	TBX6
AES	TCF7L2
AES	TLE1
AES	U2AF2
AES	WDYHV1
AES	ZRANB1
AFAP1	ACTC1
AFAP1	BRCA1
AFAP1	IQGAP1
AFAP1	SYNPO
AFAP1	TPX2
AFDN	CCDC8
AFDN	CTNNA1
AFDN	DCLK1
AFDN	F11R
AFDN	GRB2
AFDN	HRAS
AFDN	LRFN1
AFDN	NCK2
AFDN	RRAS
AFDN	SH3PXD2A
AFDN	SMAD2
AFDN	SSX2IP
AFF1	AFF4
AFF1	BRD4
AFF1	CCNT1
AFF1	CDK9
AFF1	EAF1
AFF1	ELL2
AFF1	KMT2A
AFF1	NSD1
AFF1	RELA
AFF1	SIAH1
AFF1	SIAH2
AFF4	CTR9
AFF4	ELL
AFF4	ELL2
AFF4	ELL3
AFF4	KMT2A
AFF4	MED10
AFF4	MLLT3
AFG3L2	ATP5F1
AFG3L2	COQ2
AFG3L2	MAIP1
AFG3L2	MRPL58
AFG3L2	NDUFA13
AFG3L2	NDUFA4
AFG3L2	NDUFA9
AFG3L2	NDUFS1
AFG3L2	NDUFS8
AFG3L2	NTRK1
AFG3L2	OCIAD1
AFG3L2	PHB2
AFG3L2	PTPMT1
AFG3L2	RPN1
AFG3L2	TIMMDC1
AFG3L2	TMCO1
AFG3L2	UQCRQ
AFTPH	AP1G2
AFTPH	GGA1
AFTPH	GGA2
AFTPH	STAT5B
AFTPH	UBE3A
AFTPH	VAPB
AFTPH	XPO1
AGER	APP
AGER	S100B
AGER	TIRAP
AGL	APPL1
AGL	CAT
AGL	CUL3
AGL	FKBP1A
AGL	FKBP1B
AGL	GCK
AGL	MCFD2
AGL	PKM
AGL	PRKAB1
AGL	RAN
AGL	SMAD3
AGO1	CNOT7
AGO1	CRK
AGO1	CUL3
AGO1	DCAF10
AGO1	DCP2
AGO1	DICER1
AGO1	HSP90AB1
AGO1	MOV10
AGO1	POLR2A
AGO1	RELA
AGO1	TARBP2
AGO1	XPO1
AGO2	AGO1
AGO2	AGO3
AGO2	CEP170
AGO2	CEP250
AGO2	CNOT6
AGO2	CNOT7
AGO2	CNOT8
AGO2	CPS1
AGO2	CRK
AGO2	CUL1
AGO2	CUL5
AGO2	DCP1A
AGO2	DDX6
AGO2	DICER1
AGO2	FXR1
AGO2	GEMIN4
AGO2	HDAC1
AGO2	HSP90AA1
AGO2	IFI16
AGO2	LIG4
AGO2	MTA2
AGO2	PFKP
AGO2	PRKAR1A
AGO2	RACK1
AGO2	TARDBP
AGO2	TNRC6B
AGO2	TP53
AGO2	TP63
AGO2	TP73
AGO2	XRN1
AGO3	AGO1
AGO3	AGO4
AGO3	AP3B1
AGO3	AP3M1
AGO3	CCT3
AGO3	CLNS1A
AGO3	CUL3
AGO3	DDOST
AGO3	DICER1
AGO3	EDC4
AGO3	EEF1A1
AGO3	EIF3L
AGO3	HSP90AA1
AGO3	HSP90AB1
AGO3	RUVBL2
AGO3	SF3B6
AGO3	SPTAN1
AGO3	SPTBN1
AGO3	TAB1
AGO3	TARBP2
AGO3	TNRC6A
AGO3	TNRC6B
AGO3	TRIM21
AGO3	TUBB4B
AGO3	UBC
AGO3	WDR77
AGO4	AGO2
AGO4	DICER1
AGO4	EEF1G
AGO4	EIF4B
AGO4	HNRNPC
AGO4	HSPA5
AGO4	IGF2BP1
AGO4	JAK1
AGO4	PABPC4
AGO4	PRMT5
AGO4	PTGES3
AGO4	RPL24
AGO4	RPL27
AGO4	RPL27A
AGO4	RPL35
AGO4	RPL38
AGO4	RPS10P5
AGO4	RPS5
AGO4	TNRC6A
AGO4	TRIM21
AGO4	TUBB4B
AGO4	WDR77
AGPS	ABCD1
AGPS	ABCD3
AGPS	IDH3G
AGPS	MCM2
AGPS	MDM2
AGPS	MRPL37
AGTR1	GRK5
AGTR1	PIGU
AGTRAP	AP3M1
AGTRAP	ARFIP2
AGTRAP	ATP5E
AGTRAP	DIABLO
AGTRAP	FATE1
AGTRAP	GABARAPL2
AGTRAP	NDUFAF3
AGTRAP	SENP2
AGTRAP	SPG21
AGTRAP	STX1A
AHCTF1	KPNB1
AHCTF1	MED19
AHCTF1	NUP93
AHCTF1	NUP98
AHCTF1	VAPB
AHCY	AHCYL1
AHCY	CUL7
AHCY	DAB2
AHCY	FH
AHCY	GMPS
AHCY	LDHB
AHCY	NME2
AHCY	PAPSS1
AHCYL1	HGS
AHCYL1	HSPA5
AHCYL1	ITPR1
AHCYL1	PDCD6IP
AHCYL1	PSAT1
AHCYL1	SERPINH1
AHCYL1	SRPK1
AHCYL1	TRIP6
AHCYL1	UBQLN1
AHCYL1	UBQLN4
AHCYL1	ZPR1
AHI1	CEP131
AHI1	DCTN1
AHI1	DCTN2
AHI1	DSP
AHI1	DVL1
AHI1	NINL
AHI1	NPHP1
AHI1	OFD1
AHI1	PCM1
AHI1	SIRT2
AHI1	SSX2IP
AHI1	WRAP73
AHNAK	CUL7
AHNAK	DMD
AHNAK	EGFR
AHNAK	ESR1
AHNAK	EZR
AHNAK	FLNB
AHNAK	HNRNPD
AHNAK	HNRNPDL
AHNAK	HNRNPH1
AHNAK	MED4
AHNAK	RPA1
AHNAK	SKI
AHNAK	SUMO2
AHNAK	TARDBP
AHNAK	U2AF2
AHR	AR
AHR	ARNT
AHR	ARNT2
AHR	CUL4B
AHR	DDB1
AHR	ESR1
AHR	GTF2F2
AHR	HSP90AA1
AHR	NCOA1
AHR	NCOR2
AHR	NFE2L2
AHR	NR2F1
AHR	NRIP1
AHR	RELA
AHR	SMARCA4
AHR	SP1
AHR	STUB1
AHR	TAF6
AHR	TAF7
AHR	TBP
AHSA1	ABL2
AHSA1	AGL
AHSA1	ASNS
AHSA1	CCT2
AHSA1	CCT4
AHSA1	CCT6A
AHSA1	EEF1A1
AHSA1	EEF1D
AHSA1	EIF3G
AHSA1	EIF4H
AHSA1	ENO1
AHSA1	GALE
AHSA1	GFPT1
AHSA1	HSP90AB1
AHSA1	HSPA5
AHSA1	LDHA
AHSA1	PDIA2
AHSA1	RPL11
AHSA1	RPL13
AHSA1	RPL17
AHSA1	RPL22
AHSA1	RPL23
AHSA1	RPL31
AHSA1	RPL38
AHSA1	RPL9
AHSA1	RPS10
AHSA1	RPS11
AHSA1	RPS13
AHSA1	RPS14
AHSA1	RPS15
AHSA1	RPS16
AHSA1	RPS18
AICDA	DIS3
AICDA	EXOSC10
AICDA	EXOSC2
AICDA	EXOSC3
AICDA	EXOSC5
AICDA	EXOSC7
AIFM1	AMFR
AIFM1	CASP3
AIFM1	CUL5
AIFM1	DLD
AIFM1	EGFR
AIFM1	EIF3G
AIFM1	GSR
AIFM1	HLA-B
AIFM1	MAP3K1
AIFM1	MAP3K3
AIFM1	NDUFS5
AIFM1	NOS2
AIFM1	NTRK1
AIFM1	RELA
AIMP1	CUL1
AIMP1	DARS
AIMP1	EEF1E1
AIMP1	EIF2S1
AIMP1	HLA-B
AIMP1	HSP90B1
AIMP1	KARS
AIMP1	LARS
AIMP1	MAPK14
AIMP1	MARS
AIMP1	MCFD2
AIMP1	PSMA7
AIMP1	PTBP1
AIMP1	QARS
AIMP1	RARS
AIMP1	RPL13
AIMP1	RPL15
AIMP1	RPL17
AIMP1	RPL21
AIMP1	RPL27A
AIMP1	RPL36
AIMP1	SMURF2
AIMP1	SNRPD3
AIMP2	AIMP1
AIMP2	BCAS2
AIMP2	CHD3
AIMP2	DARS
AIMP2	FUBP1
AIMP2	HNRNPA1
AIMP2	HSPA4
AIMP2	MARS
AIMP2	PSMD4
AIMP2	QARS
AIMP2	RARS
AIMP2	TANK
AIMP2	WDYHV1
AIP	AHR
AIP	ARNT
AIP	CSNK2A1
AIP	EGFR
AIP	IRF7
AIP	RET
AIP	SIM2
AIRE	CHD6
AIRE	DAXX
AIRE	LMNB1
AIRE	LMNB2
AIRE	MSH6
AIRE	RAD21
AIRE	SMC3
AIRE	SRC
AIRE	TOP2A
AJUBA	ACTA1
AJUBA	AURKA
AJUBA	BCAR1
AJUBA	BUB1B
AJUBA	EGLN2
AJUBA	LATS1
AJUBA	LATS2
AJUBA	LCK
AJUBA	PRKCZ
AJUBA	RARA
AJUBA	TRAF6
AJUBA	TRIP6
AK2	ACAA2
AK2	AFG3L2
AK2	DLD
AK2	DUT
AK2	MRPL12
AK2	MRPS7
AK2	NME2
AK2	NTRK1
AK2	TKT
AK2	TRAF6
AK2	TUFM
AK2	U2AF2
AKAP1	APP
AKAP1	CAV1
AKAP1	PRKACB
AKAP1	PRKAR1A
AKAP1	PRKAR2A
AKAP1	PRKAR2B
AKAP11	CUL3
AKAP11	GSK3B
AKAP11	NPM1
AKAP11	PPP1CC
AKAP11	PRKACA
AKAP11	PRKAR1A
AKAP11	PRKAR2A
AKAP12	CEP250
AKAP12	DYNC1I2
AKAP12	DYNLRB1
AKAP12	FLNA
AKAP12	KIF3B
AKAP12	OFD1
AKAP12	PDE4D
AKAP12	PRKAR2A
AKAP12	PRKCA
AKAP13	BAK1
AKAP13	GNAQ
AKAP13	PRKAR2B
AKAP13	PRKCH
AKAP13	UBB
AKAP13	YWHAE
AKAP13	YWHAZ
AKAP5	DLG1
AKAP5	PPP3CA
AKAP5	PPP3R1
AKAP5	PRKAR2B
AKAP6	ABL1
AKAP6	MYC
AKAP6	NCK1
AKAP6	PRKAR2A
AKAP6	RYR2
AKAP8	CAND1
AKAP8	CCND1
AKAP8	CDC5L
AKAP8	CRY2
AKAP8	CUL3
AKAP8	DDX5
AKAP8	FBXW11
AKAP8	FOXJ2
AKAP8	HNRNPA1
AKAP8	MYC
AKAP8	NCAPD2
AKAP8	RNF2
AKAP8	RUVBL1
AKAP8	RUVBL2
AKAP8	TADA2A
AKAP8	WDR5
AKAP8L	CIAO1
AKAP8L	MATR3
AKAP8L	MYC
AKAP8L	NANOG
AKAP8L	PRPF40A
AKAP8L	RELA
AKAP8L	RNF2
AKAP8L	XPO1
AKAP9	BLZF1
AKAP9	CDK5RAP2
AKAP9	CLASP2
AKAP9	CSNK1D
AKAP9	DISC1
AKAP9	DYNLL1
AKAP9	ELF3
AKAP9	FGFR1OP
AKAP9	GOLGA2
AKAP9	PCNT
AKAP9	PRKACA
AKAP9	PRKACB
AKAP9	PRKAR2A
AKAP9	PSTPIP1
AKAP9	TNIK
AKAP9	TRIP10
AKAP9	TUBGCP3
AKR1A1	GPI
AKR1A1	HLA-B
AKR1A1	SOD1
AKR1B1	ENO1
AKR1B1	ENO3
AKR1B1	PAX7
AKR1B1	PGAM1
AKR1B1	PRMT2
AKR1B1	SOD1
AKR1B1	SORD
AKR1B1	TKT
AKR1B1	TPI1
AKT1	ACTA1
AKT1	AHNAK
AKT1	AKT1S1
AKT1	AKT2
AKT1	ALDOA
AKT1	APPL1
AKT1	AR
AKT1	ARRB1
AKT1	ARRB2
AKT1	ATP1A1
AKT1	AURKA
AKT1	BAD
AKT1	BAX
AKT1	BRAF
AKT1	BUB1
AKT1	CAMKK1
AKT1	CARD11
AKT1	CASP9
AKT1	CDC37
AKT1	CDH1
AKT1	CDKN1A
AKT1	CDKN1B
AKT1	CREBBP
AKT1	CSNK2A1
AKT1	CTBP1
AKT1	CTNNA1
AKT1	CTNNB1
AKT1	CYLD
AKT1	DLC1
AKT1	DVL2
AKT1	EEF1G
AKT1	EGFR
AKT1	EIF4A1
AKT1	FANCA
AKT1	FASN
AKT1	FBXW7
AKT1	FHL1
AKT1	FOXO3
AKT1	FOXO4
AKT1	GAB2
AKT1	GAPDH
AKT1	GRB10
AKT1	GSK3A
AKT1	HBB
AKT1	HIST2H2BE
AKT1	HMOX1
AKT1	HSP90AA1
AKT1	HSPA4
AKT1	HSPA8
AKT1	HSPA9
AKT1	IKBKG
AKT1	ILK
AKT1	IMPDH2
AKT1	IRAK1
AKT1	IRS1
AKT1	ITGB3
AKT1	ITPR1
AKT1	KAT2B
AKT1	KAT6A
AKT1	LDHA
AKT1	LRRK2
AKT1	MAP2K4
AKT1	MAP3K11
AKT1	MAPK14
AKT1	MAPK9
AKT1	MAPKAP1
AKT1	MAPKAPK2
AKT1	MARK2
AKT1	MDH1
AKT1	MDM2
AKT1	MLH3
AKT1	MSH2
AKT1	MTOR
AKT1	MXD1
AKT1	NCOA4
AKT1	NEDD4
AKT1	NFE2L2
AKT1	NOS3
AKT1	NOTCH1
AKT1	NPM1
AKT1	NR3C1
AKT1	NR4A1
AKT1	NRAS
AKT1	PAK1
AKT1	PDCD4
AKT1	PDE3B
AKT1	PEBP1
AKT1	PHLPP1
AKT1	PIAS2
AKT1	PKN2
AKT1	PPARG
AKT1	PPARGC1A
AKT1	PPARGC1B
AKT1	PPIA
AKT1	PPP1CC
AKT1	PRKCB
AKT1	PRKCD
AKT1	PRKCZ
AKT1	PRKDC
AKT1	PSMC5
AKT1	PTK6
AKT1	PTPA
AKT1	PTPN1
AKT1	PYGO2
AKT1	RAC1
AKT1	RAF1
AKT1	RICTOR
AKT1	RPE
AKT1	RPS6KB1
AKT1	SETDB1
AKT1	SH2B2
AKT1	SIRT1
AKT1	SKI
AKT1	SMAD2
AKT1	SMAD3
AKT1	SMAD4
AKT1	SMAD7
AKT1	SNAI1
AKT1	SNCA
AKT1	STAT1
AKT1	STK11
AKT1	STK4
AKT1	STUB1
AKT1	TERF2IP
AKT1	TPM2
AKT1	TPM4
AKT1	TRAF4
AKT1	TSC2
AKT1	UBC
AKT1	VIM
AKT1	WEE1
AKT1	YAP1
AKT1	YWHAZ
AKT1	ZAP70
AKT1	ZFP36L1
AKT1S1	ITGB3BP
AKT1S1	RPS6KA5
AKT1S1	SGK1
AKT1S1	YWHAQ
AKT2	AKT1S1
AKT2	APOA1
[truncated: 94,257 more rows]

## Sheet: PNCNet
geneA	geneB
ABI1	ABI1
ABI1	SOS1
ABL1	ABL1
TP73	TP73
ACTL6A	ACTL6A
ACTL6A	RELA
AES	AES
AES	AR
AR	AR
SOS1	AKT1
RELA	AKT1
AR	AKT1
AKT1	AKT1
AR	APPL1
AKT1	APPL1
SOS1	RAF1
AKT1	RAF1
SOS1	FOXO1
AR	FOXO1
FOXO1	FOXO1
AKT1	MST1R
SOS1	STAT1
AKT1	STAT1
SOS1	AKT2
RELA	AKT2
AKT1	AKT2
CHUK	AKT2
RAF1	AKT2
FOXO1	AKT2
STAT1	AKT2
AKT2	AKT2
ALPL	ALPL
RELA	MAP3K14
AKT1	MAP3K14
ALPL	MAP3K14
MAP3K14	MAP3K14
RELA	TRAF2
CHUK	TRAF2
STAT1	TRAF2
ALPL	TRAF2
RELA	TRAF3
ALPL	TRAF3
ANAPC10	ANAPC1
ANAPC10	ANAPC2
ANAPC1	ANAPC2
ANAPC10	ANAPC4
ANAPC1	ANAPC4
ANAPC2	ANAPC4
ANAPC10	ANAPC5
ANAPC1	ANAPC5
ANAPC2	ANAPC5
ANAPC4	ANAPC5
ANAPC10	CDC23
ANAPC1	CDC23
ANAPC2	CDC23
ANAPC4	CDC23
ANAPC5	CDC23
ANAPC10	CDC27
ANAPC1	CDC27
ANAPC2	CDC27
ANAPC4	CDC27
ANAPC5	CDC27
CDC23	CDC27
ANAPC10	FZR1
ANAPC1	FZR1
ANAPC2	FZR1
ANAPC4	FZR1
ANAPC5	FZR1
CDC23	FZR1
CDC27	FZR1
FZR1	FZR1
APC	APC
AKT1	AXIN1
APC	AXIN1
AXIN1	AXIN1
ABL1	CTNNB1
AES	CTNNB1
AKT1	CTNNB1
FOXO1	CTNNB1
AKT2	CTNNB1
DLG4	DLG4
APC	Fzd2
DLG4	Fzd2
AR	GSK3B
AKT2	GSK3B
APC	GSK3B
CTNNB1	GSK3B
APC	JUP
CTNNB1	JUP
JUP	JUP
APC	TFAP2A
CTNNB1	TFAP2A
TFAP2A	TFAP2A
AKT1	APH1A
CTNNB1	APH1A
CTNNB1	APH1B
APH1A	APH1B
CTNNB1	NCSTN
CTNNB1	PSEN1
PSEN1	PSEN1
PSEN2	PSEN2
CTNNB1	PSENEN
PSEN1	APP
APH1A	JAG2
APH1B	JAG2
NCSTN	JAG2
PSEN1	JAG2
PSEN2	JAG2
PSENEN	JAG2
APPL2	MTA2
MTA2	MTA2
CTNNB1	RAB5A
RAB5A	RAB5A
AKT1	RBBP7
MTA2	RBBP7
RBBP7	RBBP7
RAF1	ARAF
SOS1	MAP2K1
STAT1	MAP2K1
ARF4	ARF4
ABI1	EGFR
RELA	EGFR
AR	EGFR
AKT1	EGFR
RAF1	EGFR
STAT1	EGFR
AKT2	EGFR
CTNNB1	EGFR
TFAP2A	EGFR
RAB5A	EGFR
RBBP7	EGFR
MAP2K1	EGFR
ARF4	EGFR
AR	RNF4
RNF4	RNF4
RELA	ATF2
AR	ATF2
TFAP2A	ATF2
ATF2	ATF2
AR	BAG1
ATF2	BRCA1
BRCA1	BRCA1
SOS1	CAV1
AR	CAV1
TRAF2	CAV1
EGFR	CAV1
CAV1	CAV1
SOS1	CCND1
RELA	CCND1
AES	CCND1
JUP	CCND1
ATF2	CCND1
CCND1	CCND1
AR	CCNE1
BRCA1	CCNE1
AR	CCNH
CCNH	CCNH
SOS1	CDC37
CHUK	CDC37
MAP3K14	CDC37
EGFR	CDC37
AR	CDK9
CCNH	CDK9
AR	COX5B
AES	CREBBP
AKT1	CREBBP
CHUK	CREBBP
STAT1	CREBBP
TFAP2A	CREBBP
RBBP7	CREBBP
CREBBP	CREBBP
SOS1	ESR1
AR	ESR1
AKT1	ESR1
AKT2	ESR1
PSEN2	ESR1
EGFR	ESR1
ATF2	ESR1
BRCA1	ESR1
CAV1	ESR1
CDK9	ESR1
AR	ETV5
FOXO1	FHL2
CTNNB1	FHL2
FHL2	FHL2
CHUK	FLNA
CAV1	FLNA
RELA	GTF2F1
ATF2	GTF2F1
CREBBP	GTF2F1
AR	GTF2F2
CCNH	GTF2F2
ESR1	GTF2F2
AR	GTF2H1
CDK9	GTF2H1
SOS1	IL6ST
AR	IL6ST
FOXO1	IL6ST
RELA	JUN
AKT1	JUN
STAT1	JUN
CTNNB1	JUN
APP	JUN
RBBP7	JUN
EGFR	JUN
CCND1	JUN
ETV5	JUN
GTF2F1	JUN
JUN	JUN
TP73	KAT2B
AR	KAT2B
KAT2B	KAT2B
AR	MDM2
AKT2	MDM2
DLG4	MDM2
CCNE1	MDM2
CREBBP	MDM2
KAT2B	MDM2
AR	MNAT1
CDK9	MNAT1
ESR1	MNAT1
GTF2F1	MNAT1
AR	MYST2
APP	MYST2
RELA	NCOA1
AR	NCOA1
AKT1	NCOA1
CTNNB1	NCOA1
ATF2	NCOA1
GTF2F1	NCOA1
JUN	NCOA1
KAT2B	NCOA1
NCOA1	NCOA1
FOXO1	NCOA2
CREBBP	NCOA2
GTF2F1	NCOA2
KAT2B	NCOA2
NCOA2	NCOA2
CCND1	NCOA3
KAT2B	NCOA3
RELA	NCOR2
AR	NCOR2
AKT1	NCOR2
MAP2K1	NCOR2
NCOA1	NCOR2
RELA	NR0B2
JUN	NR0B2
NCOR2	NR0B2
AR	NR2C2
CHUK	NR2C2
TRAF2	NR2C2
CDC37	NR2C2
NCOR2	NR2C2
AR	NR5A1
NCOR2	NR5A1
AR	NSD1
AR	PA2G4
RAF1	PAK6
MAP2K1	PAK6
AR	PATZ1
RNF4	PATZ1
AR	PIAS1
IL6ST	PIAS1
MDM2	PIAS1
PIAS1	PIAS1
RELA	PIAS3
AR	PIAS3
CREBBP	PIAS3
IL6ST	PIAS3
PIAS3	PIAS3
AR	PIAS4
STAT1	PIAS4
CREBBP	PIAS4
PIAS3	PIAS4
PIAS4	PIAS4
AR	PNRC1
ESR1	PNRC1
RELA	POU2F2
AR	PRMT1
ESR1	PRMT1
PRMT1	PRMT1
GTF2F1	PRPF6
GTF2F2	PRPF6
AR	PSMC3IP
CREBBP	PSMC3IP
SOS1	PTEN
AKT1	PTEN
AKT2	PTEN
PTEN	PTEN
SOS1	RAC3
RELA	RAC3
AR	RAC3
DLG4	RAC3
PAK6	RAC3
RELA	RAN
FOXO1	RAN
CTNNB1	RAN
RANBP9	RANBP9
ABL1	RB1
RAF1	RB1
CREBBP	RB1
JUN	RB1
MDM2	RB1
RB1	RB1
TP73	RCHY1
AR	RCHY1
AKT1	RUNX2
STAT1	RUNX2
AXIN1	RUNX2
GSK3B	RUNX2
RUNX2	RUNX2
RELA	SMAD3
AR	SMAD3
AKT1	SMAD3
CDC27	SMAD3
AXIN1	SMAD3
RBBP7	SMAD3
EGFR	SMAD3
ATF2	SMAD3
CAV1	SMAD3
CDK9	SMAD3
CREBBP	SMAD3
ESR1	SMAD3
JUN	SMAD3
KAT2B	SMAD3
NCOA1	SMAD3
NCOA2	SMAD3
NCOR2	SMAD3
PIAS3	SMAD3
PIAS4	SMAD3
RUNX2	SMAD3
RELA	SMAD4
AES	SMAD4
AR	SMAD4
CTNNB1	SMAD4
RBBP7	SMAD4
ATF2	SMAD4
CDK9	SMAD4
CREBBP	SMAD4
ESR1	SMAD4
JUN	SMAD4
KAT2B	SMAD4
NCOA1	SMAD4
NCOA2	SMAD4
NCOR2	SMAD4
PIAS1	SMAD4
PIAS3	SMAD4
PIAS4	SMAD4
SMAD4	SMAD4
RELA	SP1
AR	SP1
AKT1	SP1
APC	SP1
PSEN1	SP1
APP	SP1
RBBP7	SP1
EGFR	SP1
ATF2	SP1
CAV1	SP1
CCND1	SP1
CREBBP	SP1
ESR1	SP1
JUN	SP1
NCOA1	SP1
NR0B2	SP1
POU2F2	SP1
SP1	SP1
AR	SPDEF
AR	SRY
SOS1	STAT3
AR	STAT3
AKT1	STAT3
FOXO1	STAT3
AKT2	STAT3
MAP2K1	STAT3
EGFR	STAT3
CCND1	STAT3
CREBBP	STAT3
PIAS1	STAT3
PIAS3	STAT3
PIAS4	STAT3
AR	STUB1
RUNX2	STUB1
SMAD3	STUB1
STUB1	STUB1
AR	SVIL
SVIL	TGFB1I1
AR	TGIF1
RBBP7	TGIF1
CREBBP	TGIF1
JUN	TGIF1
AR	TMF1
TMF1	TMF1
RELA	UBE2I
BRCA1	UBE2I
CREBBP	UBE2I
ESR1	UBE2I
NCOA1	UBE2I
NCOA2	UBE2I
NR5A1	UBE2I
RAN	UBE2I
SMAD4	UBE2I
AR	UBE3A
AKT1	UBE3A
RBBP7	UBE3A
EGFR	UBE3A
JUN	UBE3A
SMAD3	UBE3A
SP1	UBE3A
UBE3A	UBE3A
RELA	ARRB2
APC	ARRB2
AXIN1	ARRB2
CTNNB1	ARRB2
GSK3B	ARRB2
RBBP7	ARRB2
ARRB2	ARRB2
APC	DVL2
CTNNB1	DVL2
RAC3	DVL2
RUNX2	DVL2
DVL2	DVL2
CTNNB1	FZD4
DLG4	FZD4
FZD4	FZD4
ARRB2	TGFBR3
TGFBR3	TGFBR3
ARF4	ASAP1
SOS1	SH3KBP1
ATF2	ATF3
SMAD3	ATF3
SMAD4	ATF3
APC	DVL3
CTNNB1	DVL3
JUN	DVL3
RAC3	DVL3
FZD4	DVL3
DVL3	DVL3
Axin1	Dvl1
AES	LRP6
APC	LRP6
AXIN1	LRP6
CTNNB1	LRP6
GSK3B	LRP6
APH1A	LRP6
APH1B	LRP6
NCSTN	LRP6
PSENEN	LRP6
CAV1	LRP6
CREBBP	LRP6
SMAD4	LRP6
ARRB2	LRP6
FZD4	LRP6
LRP6	LRP6
AXIN1	MAP3K4
RAC3	MAP3K4
RUNX2	MAP3K4
MAP3K4	MAP3K4
AKT1	PPP2CA
RAF1	PPP2CA
AKT2	PPP2CA
APC	PPP2CA
AXIN1	PPP2CA
CTNNB1	PPP2CA
GSK3B	PPP2CA
MAP2K1	PPP2CA
EGFR	PPP2CA
MDM2	PPP2CA
RB1	PPP2CA
ARRB2	PPP2CA
DVL3	PPP2CA
PPP2CA	PPP2CA
RAF1	PPP2R5B
AKT2	PPP2R5B
APC	PPP2R5B
AXIN1	PPP2R5B
CTNNB1	PPP2R5B
GSK3B	PPP2R5B
ARRB2	PPP2R5B
TRAF2	IKBKE
CDC37	IKBKE
UBE2I	IKBKE
AZI2	IKBKE
IKBKE	IKBKE
CDC37	TBK1
AZI2	TBK1
TRAF2	BAG4
RELA	TNFRSF1A
MAP3K14	TNFRSF1A
CAV1	TNFRSF1A
CREBBP	TNFRSF1A
NCOR2	TNFRSF1A
JUN	RELB
BCL7A	RELB
RELB	RELB
CREBBP	BCL9
SMAD4	BCL9
BCL9	BCL9
RELA	BIRC2
BIRC2	BIRC2
RELA	RIPK1
STAT1	RIPK1
MAP3K14	RIPK1
CAV1	RIPK1
TBK1	RIPK1
BAG4	RIPK1
RELA	TRADD
CHUK	TRADD
MAP3K14	TRADD
CAV1	TRADD
BAG4	TRADD
STAT1	TNFRSF1B
TNFRSF1A	TNFRSF1B
RIPK1	TNFRSF1B
TRADD	TNFRSF1B
RELA	BIRC3
BAG4	BIRC3
BIRC2	BIRC3
BIRC3	BIRC3
CHUK	BTRC
MAP3K14	BTRC
AXIN1	BTRC
GSK3B	BTRC
JUP	BTRC
SMAD3	BTRC
SMAD4	BTRC
PPP2CA	BTRC
PPP2R5B	BTRC
BTRC	BTRC
RELA	CUL1
CHUK	CUL1
MAP3K14	CUL1
APC	CUL1
AXIN1	CUL1
CTNNB1	CUL1
RUNX2	CUL1
SMAD3	CUL1
RELB	CUL1
CUL1	CUL1
RELA	RBX1
GSK3B	RBX1
CCNE1	RBX1
RUNX2	RBX1
SMAD3	RBX1
DVL2	RBX1
DVL3	RBX1
RELA	SKP1
CHUK	SKP1
MAP3K14	SKP1
APC	SKP1
AXIN1	SKP1
CTNNB1	SKP1
RUNX2	SKP1
SMAD3	SKP1
RELB	SKP1
SKP1	SKP1
CAV1	CAMK2B
SMAD4	CAMK2B
DLG4	CAMK2D
SMAD4	CAMK2D
CAMK2D	CAMK2D
DLG4	CAMK2G
SMAD4	CAMK2G
CAMK2G	CAMK2G
AKT1	MAP3K7
RAF1	MAP3K7
MAP3K14	MAP3K7
TRAF2	MAP3K7
MAP2K1	MAP3K7
ATF2	MAP3K7
TNFRSF1A	MAP3K7
RIPK1	MAP3K7
TRADD	MAP3K7
CAMK2B	MAP3K7
CAMK2D	MAP3K7
CAMK2G	MAP3K7
TRAF2	NFKBIA
NCOR2	NFKBIA
RAN	NFKBIA
STAT3	NFKBIA
UBE2I	NFKBIA
ARRB2	NFKBIA
TNFRSF1A	NFKBIA
BIRC3	NFKBIA
RBX1	NFKBIA
CAPN3	NFKBIA
NFKBIA	NFKBIA
CHUK	CASP10
TRAF2	CASP10
BAG4	CASP10
BIRC2	CASP10
TRADD	CASP10
BIRC3	CASP10
AKT1	FADD
STAT1	FADD
AKT2	FADD
MAP3K14	FADD
BAG4	FADD
BIRC2	FADD
BIRC3	FADD
RELA	CASP8
AR	CASP8
CHUK	CASP8
MAP3K14	CASP8
APP	CASP8
BAG4	CASP8
TNFRSF1A	CASP8
BIRC2	CASP8
BIRC3	CASP8
MAP3K14	CASP2
TRAF2	CASP2
BAG4	CASP2
TNFRSF1A	CASP2
BIRC2	CASP2
RIPK1	CASP2
TRADD	CASP2
BIRC3	CASP2
FADD	CASP2
CASP8	CASP2
MAP3K14	CRADD
TRAF2	CRADD
BAG4	CRADD
TNFRSF1A	CRADD
TRADD	CRADD
BIRC3	CRADD
FADD	CRADD
AKT1	CASP3
APPL1	CASP3
TRAF2	CASP3
RB1	CASP3
TNFRSF1A	CASP3
TRADD	CASP3
CASP10	CASP3
FADD	CASP3
CASP8	CASP3
CASP2	CASP3
BAG4	CFLAR
CASP10	CFLAR
CFLAR	CFLAR
RB1	CASP7
BIRC3	CASP7
CASP10	CASP7
FADD	CASP7
CASP8	CASP7
CASP2	CASP7
CASP3	CASP7
AKT2	CASP9
CASP9	CASP9
SOS1	MAPK1
RELA	MAPK1
AR	MAPK1
AKT1	MAPK1
CHUK	MAPK1
STAT1	MAPK1
MAP3K14	MAPK1
APP	MAPK1
EGFR	MAPK1
ATF2	MAPK1
CAV1	MAPK1
CCND1	MAPK1
JUN	MAPK1
NCOR2	MAPK1
RANBP9	MAPK1
RB1	MAPK1
SMAD3	MAPK1
SMAD4	MAPK1
STAT3	MAPK1
TGIF1	MAPK1
ARRB2	MAPK1
PPP2CA	MAPK1
PPP2R5B	MAPK1
CAMK2B	MAPK1
CAMK2D	MAPK1
CAMK2G	MAPK1
MAP3K7	MAPK1
NFKBIA	MAPK1
FADD	MAPK1
CASP8	MAPK1
RELA	MAPK3
AKT1	MAPK3
CHUK	MAPK3
FOXO1	MAPK3
STAT1	MAPK3
MAP3K14	MAPK3
AXIN1	MAPK3
CTNNB1	MAPK3
APP	MAPK3
ATF2	MAPK3
BRCA1	MAPK3
CAV1	MAPK3
CCND1	MAPK3
JUN	MAPK3
MDM2	MAPK3
NCOA1	MAPK3
NCOR2	MAPK3
RANBP9	MAPK3
RB1	MAPK3
SMAD3	MAPK3
SP1	MAPK3
STAT3	MAPK3
TGIF1	MAPK3
ARRB2	MAPK3
PPP2R5B	MAPK3
CAMK2B	MAPK3
NFKBIA	MAPK3
FADD	MAPK3
CASP8	MAPK3
RAF1	DNM1
MAP2K1	DNM1
EGFR	DNM1
CAV1	DNM1
ARRB2	DNM1
SH3KBP1	DNM1
MAPK3	DNM1
MAP3K14	GRB7
CAV1	GRB7
GRB7	GRB7
CAV2	CAV2
EGFR	NCK1
PAK6	NCK1
RAC3	NCK1
CAV2	NCK1
NCK1	NCK1
SOS1	RASA1
AKT1	RASA1
RAF1	RASA1
STAT1	RASA1
AKT2	RASA1
EGFR	RASA1
STAT3	RASA1
MAPK1	RASA1
CAV2	RASA1
RASA1	RASA1
ABL1	CBLB
AKT1	CBLB
TRAF2	CBLB
EGFR	CBLB
IL6ST	CBLB
CBLB	CBLB
ABL1	CBLC
EGFR	CBLC
IL6ST	CBLC
EGFR	CRK
RAC3	CRK
MAP3K7	CRK
MAPK3	CRK
CBLB	CRK
CBLC	CRK
CRK	CRK
SOS1	SPRY2
TFAP2A	SPRY2
SP1	SPRY2
SH3KBP1	SPRY2
PPP2CA	SPRY2
RASA1	SPRY2
CBLB	SPRY2
CBLC	SPRY2
SPRY2	SPRY2
CDC37	CBL
PPP2CA	CBL
ABL1	KIT
CREBBP	KIT
SP1	KIT
SH3KBP1	KIT
RASA1	KIT
CBLB	KIT
CRK	KIT
ABL1	CRKL
EGFR	CRKL
RAC3	CRKL
MAP3K7	CRKL
CBLB	CRKL
CBLC	CRKL
CRK	CRKL
KIT	CRKL
CRKL	CRKL
RELA	PIK3R1
AR	PIK3R1
AKT1	PIK3R1
RAF1	PIK3R1
AKT2	PIK3R1
MAP2K1	PIK3R1
CCND1	PIK3R1
CDC37	PIK3R1
PTEN	PIK3R1
RAC3	PIK3R1
SP1	PIK3R1
STAT3	PIK3R1
NFKBIA	PIK3R1
MAPK1	PIK3R1
MAPK3	PIK3R1
CBLB	PIK3R1
CBLC	PIK3R1
CRK	PIK3R1
CRKL	PIK3R1
AKT1	PIK3R2
AKT2	PIK3R2
EGFR	PIK3R2
PTEN	PIK3R2
RAC3	PIK3R2
CBLB	PIK3R2
CBLC	PIK3R2
CRK	PIK3R2
CBL	PIK3R2
KIT	PIK3R2
CRKL	PIK3R2
PIK3R1	PIK3R2
ABL1	SHC1
AKT1	SHC1
RAF1	SHC1
STAT1	SHC1
AKT2	SHC1
DLG4	SHC1
MAP2K1	SHC1
CAV1	SHC1
CDC37	SHC1
IL6ST	SHC1
PTEN	SHC1
STAT3	SHC1
MAPK1	SHC1
GRB7	SHC1
RASA1	SHC1
SPRY2	SHC1
KIT	SHC1
ABL1	CCNA2
ATF2	CCNA2
CCNE1	CCNA2
MDM2	CCNA2
RB1	CCNA2
ABL1	CDK2
FOXO1	CDK2
ANAPC10	CDK2
ANAPC1	CDK2
ANAPC2	CDK2
ANAPC4	CDK2
ANAPC5	CDK2
CDC23	CDK2
CDC27	CDK2
BRCA1	CDK2
SMAD3	CDK2
SMAD4	CDK2
RBX1	CDK2
CCNA2	CDK2
CDK2	CDK2
ANAPC10	CCNB1
ANAPC1	CCNB1
ANAPC2	CCNB1
ANAPC4	CCNB1
ANAPC5	CCNB1
CDC23	CCNB1
CDC27	CCNB1
TFAP2A	CCNB1
RUNX2	CCNB1
SP1	CCNB1
CDK2	CCNB1
CCNB1	CCNB1
FZR1	CDK1
MAP2K1	CDK1
CCNH	CDK1
MDM2	CDK1
MNAT1	CDK1
RUNX2	CDK1
CCNA2	CDK1
CDK1	CDK1
CCNB1	PTCH1
CDK1	PTCH1
PTCH1	PTCH1
ANAPC10	CCNB2
ANAPC1	CCNB2
ANAPC2	CCNB2
ANAPC4	CCNB2
ANAPC5	CCNB2
CDC23	CCNB2
CDC27	CCNB2
FZR1	CCNB2
CDK2	CCNB2
AXIN1	TGFBR2
CTNNB1	TGFBR2
ATF2	TGFBR2
CAV1	TGFBR2
NR2C2	TGFBR2
SMAD4	TGFBR2
TGFBR3	TGFBR2
PPP2CA	TGFBR2
MAP3K7	TGFBR2
CBL	TGFBR2
PIK3R1	TGFBR2
PIK3R2	TGFBR2
SHC1	TGFBR2
CDK1	TGFBR2
GSK3B	CDK4
RUNX2	CDK4
SMAD3	CDK4
SMAD4	CDK4
MAPK1	CDK4
CCNB1	CDK4
CCNB2	CDK4
AR	CDK6
MNAT1	CDK6
RB1	CDK6
CCNB1	CDK6
CCNB2	CDK6
CDK4	CDK6
CDK6	CDK6
CCNE1	RBL1
NCOR2	RBL1
CDK6	RBL1
RBL1	RBL1
NCOR2	RBL2
SMAD3	RBL2
SMAD4	RBL2
CUL1	RBL2
SKP1	RBL2
CDK6	RBL2
RBL1	RBL2
RBL2	RBL2
AKT1	ITGA6
MST1R	ITGA6
EGFR	ITGA6
CAV1	ITGA6
FLNA	ITGA6
CASP3	ITGA6
CASP7	ITGA6
CRK	ITGA6
CRKL	ITGA6
PIK3R1	ITGA6
SHC1	ITGA6
ITGA6	ITGA6
RELA	NFKBIB
CHUK	NFKBIB
BTRC	NFKBIB
CUL1	NFKBIB
SKP1	NFKBIB
NFKBIA	NFKBIB
NFKBIB	NFKBIB
ANAPC10	CDC16
ANAPC1	CDC16
ANAPC2	CDC16
ANAPC4	CDC16
ANAPC5	CDC16
CDC23	CDC16
CDC27	CDC16
FZR1	CDC16
SMAD3	CDC16
CDK2	CDC16
CCNB1	CDC16
CCNB2	CDC16
CDC27	SKIL
FZR1	SKIL
RBBP7	SKIL
NCOR2	SKIL
CDC16	SKIL
SKIL	SKIL
TP73	SMAD2
CDC27	SMAD2
AXIN1	SMAD2
CTNNB1	SMAD2
RBBP7	SMAD2
ATF2	SMAD2
CAV1	SMAD2
CDK9	SMAD2
CREBBP	SMAD2
ESR1	SMAD2
JUN	SMAD2
KAT2B	SMAD2
NCOA1	SMAD2
NCOR2	SMAD2
PIAS3	SMAD2
RUNX2	SMAD2
CUL1	SMAD2
RBX1	SMAD2
SKP1	SMAD2
CAMK2B	SMAD2
CAMK2D	SMAD2
CAMK2G	SMAD2
MAPK1	SMAD2
MAPK3	SMAD2
RBL2	SMAD2
CDC16	SMAD2
CDK1	CDC25A
CCNB2	CDC25A
CDK4	CDC25A
CDK6	CDC25A
BIRC2	ROCK1
MAPK1	ROCK1
CDC25A	ROCK1
ROCK1	ROCK1
SP1	CDC25C
CCNB2	CDC25C
NFKBIA	CDC34
SOS1	HSP90AA1
AR	HSP90AA1
CHUK	HSP90AA1
MAP3K14	HSP90AA1
RAB5A	HSP90AA1
MDM2	HSP90AA1
NR2C2	HSP90AA1
UBE3A	HSP90AA1
IKBKE	HSP90AA1
TBK1	HSP90AA1
CAMK2B	HSP90AA1
MAPK1	HSP90AA1
MAPK3	HSP90AA1
CRK	HSP90AA1
CBL	HSP90AA1
PIK3R1	HSP90AA1
SHC1	HSP90AA1
CHUK	MAP3K3
TRAF2	MAP3K3
MAP2K1	MAP3K3
CDC37	MAP3K3
RAC3	MAP3K3
TNFRSF1A	MAP3K3
RIPK1	MAP3K3
TRADD	MAP3K3
MAP3K7	MAP3K3
NFKBIA	MAP3K3
HSP90AA1	MAP3K3
MAP3K3	MAP3K3
SOS1	CDC42
ABL1	CDC42
APC	CDC42
PAK6	CDC42
RAC3	CDC42
SH3KBP1	CDC42
MAP3K4	CDC42
PIK3R1	CDC42
PIK3R2	CDC42
TNK2	TNK2
JUP	CDH1
APH1A	CDH1
APH1B	CDH1
PSENEN	CDH1
RAB5A	CDH1
SMAD3	CDH1
SMAD4	CDH1
MAPK1	CDH1
MAPK3	CDH1
PIK3R1	CDH1
ITGA6	CDH1
SKIL	CDH1
CDC42	CDH1
RELA	CDKN1A
AKT2	CDKN1A
TFAP2A	CDKN1A
ATF2	CDKN1A
ESR1	CDKN1A
JUN	CDKN1A
SMAD3	CDKN1A
SMAD4	CDKN1A
SP1	CDKN1A
RELB	CDKN1A
RBX1	CDKN1A
MAPK3	CDKN1A
CCNA2	CDKN1A
CCNB1	CDKN1A
RBL1	CDKN1A
RBL2	CDKN1A
HSP90AA1	CDKN1A
CDKN1A	CDKN1A
CTNNB1	ID2
RB1	ID2
SMAD4	ID2
CDK2	ID2
SMAD4	ID3
CDK2	ID3
CTNNB1	CDX1
BCL9	CDX1
CDX1	CDX1
AES	LEF1
CCND1	LEF1
PIAS4	LEF1
SMAD3	LEF1
SMAD4	LEF1
LRP6	LEF1
SMAD2	LEF1
CDH1	LEF1
CDX1	LEF1
LEF1	LEF1
AR	CEBPA
GSK3B	CEBPA
JUN	CEBPA
MYST2	CEBPA
NCOA2	CEBPA
RB1	CEBPA
SP1	CEBPA
MAPK3	CEBPA
CDK4	CEBPA
SOS1	MYC
ABL1	MYC
RELA	MYC
AES	MYC
AR	MYC
AKT1	MYC
AXIN1	MYC
CTNNB1	MYC
GSK3B	MYC
JUP	MYC
TFAP2A	MYC
RBBP7	MYC
EGFR	MYC
CCND1	MYC
JUN	MYC
PIAS1	MYC
PIAS3	MYC
PIAS4	MYC
POU2F2	MYC
SMAD3	MYC
SMAD4	MYC
SP1	MYC
STAT3	MYC
UBE3A	MYC
DVL3	MYC
PPP2CA	MYC
CFLAR	MYC
MAPK1	MYC
MAPK3	MYC
PIK3R1	MYC
CCNB1	MYC
CDK4	MYC
CDK6	MYC
RBL1	MYC
RBL2	MYC
ITGA6	MYC
SMAD2	MYC
CDC25A	MYC
HSP90AA1	MYC
CDKN1A	MYC
ID2	MYC
LEF1	MYC
CEBPA	MYC
MYC	MYC
FOXO1	CEBPB
CREBBP	CEBPB
JUN	CEBPB
RB1	CEBPB
SMAD3	CEBPB
SMAD4	CEBPB
RBL1	CEBPB
SMAD2	CEBPB
MYC	CEBPB
AR	NFKB1
AKT1	NFKB1
AKT2	NFKB1
MAP3K14	NFKB1
TRAF2	NFKB1
TRAF3	NFKB1
BRCA1	NFKB1
CCND1	NFKB1
POU2F2	NFKB1
RAC3	NFKB1
RAN	NFKB1
ARRB2	NFKB1
TNFRSF1A	NFKB1
RELB	NFKB1
BIRC2	NFKB1
RIPK1	NFKB1
TRADD	NFKB1
BIRC3	NFKB1
RBX1	NFKB1
SKP1	NFKB1
CASP10	NFKB1
FADD	NFKB1
CASP8	NFKB1
CFLAR	NFKB1
MAPK1	NFKB1
MAPK3	NFKB1
PIK3R1	NFKB1
NFKBIB	NFKB1
CEBPA	NFKB1
MYC	NFKB1
CHUK	FKBP5
NR2C2	FKBP5
IKBKE	FKBP5
FKBP5	FKBP5
AR	HSP90AB1
CHUK	HSP90AB1
MAP3K14	HSP90AB1
APP	HSP90AB1
ESR1	HSP90AB1
NR2C2	HSP90AB1
STAT3	HSP90AB1
IKBKE	HSP90AB1
TBK1	HSP90AB1
MAP3K3	HSP90AB1
CDKN1A	HSP90AB1
HSP90AB1	HSP90AB1
EGFR	NFKB2
JUN	NFKB2
SP1	NFKB2
UBE2I	NFKB2
CUL1	NFKB2
SKP1	NFKB2
NFKBIB	NFKB2
NFKB1	NFKB2
NFKB2	NFKB2
CHUK	NLRP4
TBK1	NLRP4
AKT1	PEBP1
CHUK	PEBP1
AKT2	PEBP1
MAP3K14	PEBP1
MAP2K1	PEBP1
NR2C2	PEBP1
PPP2CA	PEBP1
PPP2R5B	PEBP1
MAP3K7	PEBP1
MAPK1	PEBP1
PEBP1	PEBP1
SOS1	PTPN11
AKT1	PTPN11
CHUK	PTPN11
RAF1	PTPN11
FOXO1	PTPN11
AKT2	PTPN11
MAP2K1	PTPN11
CCND1	PTPN11
RANBP9	PTPN11
PPP2CA	PTPN11
MAPK1	PTPN11
MAPK3	PTPN11
RASA1	PTPN11
CRK	PTPN11
CBL	PTPN11
PIK3R2	PTPN11
CCNB1	PTPN11
CHUK	HIST3H3
EGFR	HIST3H3
RELA	HDAC2
AES	HDAC2
AKT1	HDAC2
FOXO1	HDAC2
CTNNB1	HDAC2
MTA2	HDAC2
RBBP7	HDAC2
EGFR	HDAC2
CREBBP	HDAC2
JUN	HDAC2
MDM2	HDAC2
NCOR2	HDAC2
RB1	HDAC2
SMAD3	HDAC2
SMAD4	HDAC2
SP1	HDAC2
TGIF1	HDAC2
UBE2I	HDAC2
UBE3A	HDAC2
ARRB2	HDAC2
CAMK2B	HDAC2
RBL1	HDAC2
RBL2	HDAC2
SKIL	HDAC2
SMAD2	HDAC2
CDKN1A	HDAC2
LEF1	HDAC2
MYC	HDAC2
NFKB1	HDAC2
CIR1	HDAC2
STAT1	RBPJ
CREBBP	RBPJ
KAT2B	RBPJ
NCOR2	RBPJ
CIR1	RBPJ
HDAC2	RBPJ
RBPJ	RBPJ
AKT1	SAP30
RBBP7	SAP30
EGFR	SAP30
CREBBP	SAP30
JUN	SAP30
SMAD3	SAP30
SMAD4	SAP30
SP1	SAP30
TGIF1	SAP30
UBE3A	SAP30
ARRB2	SAP30
SKIL	SAP30
SMAD2	SAP30
MYC	SAP30
CIR1	SAP30
SAP30	SAP30
TFAP2A	CITED1
RBBP7	CITED1
CREBBP	CITED1
ESR1	CITED1
SMAD3	CITED1
SMAD4	CITED1
TGIF1	CITED1
SMAD2	CITED1
HDAC2	CITED1
SAP30	CITED1
CITED1	CITED1
AKT1	EP300
STAT1	EP300
TFAP2A	EP300
RBBP7	EP300
ATF2	EP300
CCND1	EP300
GTF2F1	EP300
JUN	EP300
KAT2B	EP300
NCOA2	EP300
PIAS3	EP300
PIAS4	EP300
RB1	EP300
SMAD3	EP300
SMAD4	EP300
SP1	EP300
TGIF1	EP300
TNFRSF1A	EP300
BCL9	EP300
SMAD2	EP300
CDX1	EP300
CEBPB	EP300
HDAC2	EP300
SAP30	EP300
EP300	EP300
TFAP2A	HSPA8
SMAD3	HSPA8
SMAD4	HSPA8
SP1	HSPA8
STUB1	HSPA8
SMAD2	HSPA8
FKBP5	HSPA8
CITED1	HSPA8
HSPA8	HSPA8
AKT1	ITGB4
MST1R	ITGB4
EGFR	ITGB4
CAV1	ITGB4
FLNA	ITGB4
CASP3	ITGB4
CASP7	ITGB4
CAV2	ITGB4
CRK	ITGB4
CRKL	ITGB4
PIK3R1	ITGB4
PIK3R2	ITGB4
CDH1	ITGB4
MYC	ITGB4
CLCA1	ITGB4
ITGB4	ITGB4
ITGB4	CLCA2
Cntn1	Notch2
CAV1	COL17A1
FLNA	COL17A1
CD151	COL17A1
COL17A1	COL17A1
CASP3	DSP
EGFR	PLEC
CASP8	PLEC
CD151	PLEC
ITGA6	PLEC
RELA	COMMD1
CUL1	COMMD1
RBX1	COMMD1
SKP1	COMMD1
NFKBIA	COMMD1
JUN	COPS5
NCOA1	COPS5
SMAD4	COPS5
RBX1	COPS5
EP300	COPS5
COMMD1	COPS5
COPS5	COPS5
CREBBP	SNIP1
SMAD3	SNIP1
SMAD4	SNIP1
SMAD2	SNIP1
CITED1	SNIP1
EP300	SNIP1
SOS1	DOK1
RAF1	DOK1
NCK1	DOK1
RASA1	DOK1
PIK3R1	DOK1
PIK3R2	DOK1
SHC1	DOK1
DOK1	DOK1
CBLB	CSF2RB
CBLC	CSF2RB
CBL	CSF2RB
KIT	CSF2RB
PIK3R2	CSF2RB
CSF2RB	CSF2RB
SOS1	CSK
PSEN1	CSK
EGFR	CSK
RASA1	CSK
ITGA6	CSK
ITGB4	CSK
DOK1	CSK
FOXO1	CSNK1D
APC	CSNK1D
AXIN1	CSNK1D
CTNNB1	CSNK1D
GSK3B	CSNK1D
NCOR2	CSNK1D
ARRB2	CSNK1D
FZD4	CSNK1D
LRP6	CSNK1D
PPP2CA	CSNK1D
PPP2R5B	CSNK1D
BTRC	CSNK1D
HSP90AA1	CSNK1D
Dvl1	Csnk1e
FOXO1	CSNK1E
APC	CSNK1E
CTNNB1	CSNK1E
GSK3B	CSNK1E
ARRB2	CSNK1E
DVL2	CSNK1E
FZD4	CSNK1E
LRP6	CSNK1E
PPP2CA	CSNK1E
PPP2R5B	CSNK1E
BTRC	CSNK1E
HSP90AA1	CSNK1E
CSNK1D	CSNK1E
CSNK1E	CSNK1E
RELA	CSNK2A1
APC	CSNK2A1
AXIN1	CSNK2A1
CTNNB1	CSNK2A1
GSK3B	CSNK2A1
PTEN	CSNK2A1
ARRB2	CSNK2A1
LRP6	CSNK2A1
PPP2CA	CSNK2A1
PPP2R5B	CSNK2A1
MAPK3	CSNK2A1
NFKB1	CSNK2A1
EP300	CSNK2A1
CSNK1D	CSNK2A1
CSNK1E	CSNK2A1
CSNK2A1	CSNK2A1
RELA	CSNK2A2
APC	CSNK2A2
AXIN1	CSNK2A2
CTNNB1	CSNK2A2
GSK3B	CSNK2A2
PTEN	CSNK2A2
ARRB2	CSNK2A2
PPP2CA	CSNK2A2
PPP2R5B	CSNK2A2
NFKB1	CSNK2A2
CSNK1D	CSNK2A2
CSNK1E	CSNK2A2
CSNK2A2	CSNK2A2
RELA	CSNK2B
APC	CSNK2B
AXIN1	CSNK2B
CTNNB1	CSNK2B
GSK3B	CSNK2B
ARRB2	CSNK2B
DVL2	CSNK2B
DVL3	CSNK2B
PPP2CA	CSNK2B
PPP2R5B	CSNK2B
TGFBR2	CSNK2B
CSNK1D	CSNK2B
CSNK1E	CSNK2B
CSNK2B	CSNK2B
RBBP7	CTCF
SMAD4	CTCF
Ctnnb1	Ctnnbip1
AES	NLK
CREBBP	NLK
NCOA1	NLK
MAP3K7	NLK
AXIN1	PIN1
GSK3B	PIN1
MDM2	PIN1
PPP2CA	PIN1
MYC	PIN1
CSNK2A2	PIN1
CSNK2B	PIN1
PIN1	PIN1
CTNNB1	RUVBL1
RUVBL1	RUVBL1
CTNNB1	SALL1
CTNNB1	SOX1
AXIN1	CTNND1
EGFR	CTNND1
RAC3	CTNND1
PIK3R1	CTNND1
CDC42	CTNND1
CTNND1	CTNND1
SOS1	PTPN6
AKT1	PTPN6
STAT1	PTPN6
AKT2	PTPN6
IL6ST	PTPN6
RASA1	PTPN6
SPRY2	PTPN6
PIK3R1	PTPN6
PTPN11	PTPN6
CSK	PTPN6
CHUK	FBXW11
MAP3K14	FBXW11
APC	FBXW11
AXIN1	FBXW11
CTNNB1	FBXW11
GSK3B	FBXW11
APH1A	FBXW11
APH1B	FBXW11
NCSTN	FBXW11
PSEN1	FBXW11
PSENEN	FBXW11
CCNE1	FBXW11
PPP2CA	FBXW11
PPP2R5B	FBXW11
TNFRSF1A	FBXW11
BTRC	FBXW11
CSNK1D	FBXW11
CSNK1E	FBXW11
FOXO1	SKP2
RB1	SKP2
RUNX2	SKP2
RBL2	SKP2
SKP2	SKP2
GSK3B	FBXW7
RUNX2	FBXW7
BTRC	FBXW7
RBX1	FBXW7
NFKB2	NFKBIE
FBXW11	NFKBIE
AES	TCF3
CTNNB1	TCF3
SMAD3	TCF3
SMAD4	TCF3
LRP6	TCF3
CUL1	TCF3
RBX1	TCF3
SKP1	TCF3
MAPK1	TCF3
MAPK3	TCF3
ID2	TCF3
NLK	TCF3
SKP2	TCF3
TCF3	TCF3
TNFRSF1A	CYLD
TRADD	CYLD
CYLD	TRAIP
AKT1	TRAF6
MAP3K14	TRAF6
TRAF2	TRAF6
TRAF3	TRAF6
PSEN2	TRAF6
NR2C2	TRAF6
IKBKE	TRAF6
TBK1	TRAF6
TNFRSF1A	TRAF6
RIPK1	TRAF6
TRADD	TRAF6
NFKBIA	TRAF6
FADD	TRAF6
MAPK1	TRAF6
CBLB	TRAF6
DVL3	DAAM1
DAAM1	DAAM1
SOS1	RHOA
AKT1	RHOA
CTNNB1	RHOA
DLG4	RHOA
EGFR	RHOA
CCNE1	RHOA
RAC3	RHOA
ASAP1	RHOA
CASP3	RHOA
MAPK1	RHOA
MAPK3	RHOA
RASA1	RHOA
CRK	RHOA
PIK3R1	RHOA
PIK3R2	RHOA
SHC1	RHOA
CDH1	RHOA
CDKN1A	RHOA
PTPN11	RHOA
CTNND1	RHOA
RHOA	RHOA
AXIN1	DAB2
SMAD3	DAB2
DVL3	DAB2
TGFBR2	DAB2
SMAD2	DAB2
TNFRSF1A	DAP
AKT1	DAXX
AKT2	DAXX
TRAF2	DAXX
BAG4	DAXX
TNFRSF1A	DAXX
RIPK1	DAXX
TRADD	DAXX
TNFRSF1B	DAXX
BIRC3	DAXX
CASP10	DAXX
FADD	DAXX
CASP8	DAXX
CASP2	DAXX
CRADD	DAXX
CFLAR	DAXX
CASP7	DAXX
DAXX	DAXX
BIRC2	DDX3X
ROCK1	DDX3X
NFKB2	DDX3X
PTCH1	DHH
DHH	DHH
DHH	HHIP
HHIP	HHIP
DHH	PTCH2
PTCH2	PTCH2
CTNNB1	DKK1
LRP6	DKK1
MYC	DKK1
HDAC2	DKK1
DKK1	DKK1
CTNNB1	LRP5
APH1A	LRP5
APH1B	LRP5
NCSTN	LRP5
PSENEN	LRP5
ARRB2	LRP5
FZD4	LRP5
CSNK1D	LRP5
CSNK1E	LRP5
CTNND1	LRP5
LRP5	LRP5
APH1A	DLL1
APH1B	DLL1
NCSTN	DLL1
PSEN1	DLL1
PSENEN	DLL1
DLL1	DLL1
STAT1	NOTCH3
APH1A	NOTCH3
APH1B	NOTCH3
NCSTN	NOTCH3
PSENEN	NOTCH3
EGFR	NOTCH3
CREBBP	NOTCH3
KAT2B	NOTCH3
NCOR2	NOTCH3
DVL2	NOTCH3
DVL3	NOTCH3
DLL1	NOTCH3
DNM1	SH3GL3
SH3GL3	SH3GL3
ABL1	LYN
STAT1	LYN
EGFR	LYN
JUN	LYN
RASA1	LYN
CBLB	LYN
CBL	LYN
KIT	LYN
NFKB1	LYN
PTPN11	LYN
DOK1	LYN
CSK	LYN
SP1	FES
KIT	FES
PIK3R1	FES
DOK1	FES
FES	FES
ABL1	FGR
EGFR	FGR
DNM1	FGR
CBL	FGR
DOK1	FGR
CSK	FGR
SOS1	HCK
EGFR	HCK
IL6ST	HCK
DNM1	HCK
RASA1	HCK
KIT	HCK
PTPN11	HCK
DOK1	HCK
CSK	HCK
HCK	HCK
SOS1	INPP5D
RAF1	INPP5D
PTEN	INPP5D
RASA1	INPP5D
PIK3R1	INPP5D
PIK3R2	INPP5D
SHC1	INPP5D
PTPN11	INPP5D
DOK1	INPP5D
LYN	INPP5D
INPP5D	INPP5D
ABL1	PLCG1
AKT1	PLCG1
STAT1	PLCG1
AKT2	PLCG1
CDC37	PLCG1
STAT3	PLCG1
DNM1	PLCG1
NCK1	PLCG1
RASA1	PLCG1
SPRY2	PLCG1
CBL	PLCG1
KIT	PLCG1
HSP90AA1	PLCG1
CDC42	PLCG1
PTPN11	PLCG1
PTPN6	PLCG1
FGR	PLCG1
HCK	PLCG1
PLCG1	PLCG1
ABL1	SRC
RELA	SRC
AR	SRC
AKT1	SRC
CHUK	SRC
STAT1	SRC
CTNNB1	SRC
DLG4	SRC
MAP2K1	SRC
CAV1	SRC
NCOA1	SRC
NCOA2	SRC
RAC3	SRC
STAT3	SRC
ARRB2	SRC
PPP2CA	SRC
CAMK2B	SRC
NFKBIA	SRC
MAPK1	SRC
MAPK3	SRC
DNM1	SRC
CAV2	SRC
RASA1	SRC
CBL	SRC
KIT	SRC
ROCK1	SRC
CDH1	SRC
NFKB1	SRC
ITGB4	SRC
DOK1	SRC
CSF2RB	SRC
CTNND1	SRC
TRAF6	SRC
FES	SRC
ABL1	YES1
EGFR	YES1
CBL	YES1
KIT	YES1
CDC42	YES1
ITGB4	YES1
DOK1	YES1
CSK	YES1
CTNND1	YES1
PLCG1	YES1
YES1	YES1
RELB	DPF2
ARRB2	DTX1
DLL1	DTX1
NOTCH3	DTX1
DTX1	DTX1
APC	DVL1
CTNNB1	DVL1
FZD4	DVL1
LRP6	DVL1
CSNK1E	DVL1
CSNK2A2	DVL1
DVL1	DVL1
Dvl1	Smad2
Dvl1	Vangl2
SOS1	PRKCA
RELA	PRKCA
CHUK	PRKCA
RAF1	PRKCA
STAT1	PRKCA
TRAF2	PRKCA
ARAF	PRKCA
EGFR	PRKCA
ATF2	PRKCA
STAT3	PRKCA
DVL2	PRKCA
MAP3K4	PRKCA
PPP2CA	PRKCA
RIPK1	PRKCA
CAMK2B	PRKCA
NFKBIA	PRKCA
MAPK1	PRKCA
MAPK3	PRKCA
RASA1	PRKCA
CRK	PRKCA
ITGA6	PRKCA
MAP3K3	PRKCA
NFKB1	PRKCA
PEBP1	PRKCA
PTPN11	PRKCA
ITGB4	PRKCA
CSK	PRKCA
PIN1	PRKCA
PTPN6	PRKCA
RHOA	PRKCA
LYN	PRKCA
PLCG1	PRKCA
SRC	PRKCA
PRKCA	PRKCA
SOS1	PRKCB
RELA	PRKCB
CHUK	PRKCB
RAF1	PRKCB
STAT1	PRKCB
TRAF2	PRKCB
TFAP2A	PRKCB
ARAF	PRKCB
EGFR	PRKCB
JUN	PRKCB
STAT3	PRKCB
DVL2	PRKCB
MAP3K4	PRKCB
PPP2CA	PRKCB
RIPK1	PRKCB
CAMK2B	PRKCB
NFKBIA	PRKCB
MAPK1	PRKCB
MAPK3	PRKCB
RASA1	PRKCB
CRK	PRKCB
KIT	PRKCB
PIK3R1	PRKCB
SHC1	PRKCB
MAP3K3	PRKCB
PEBP1	PRKCB
PTPN11	PRKCB
ITGB4	PRKCB
CSK	PRKCB
PIN1	PRKCB
PTPN6	PRKCB
DAB2	PRKCB
LYN	PRKCB
INPP5D	PRKCB
PLCG1	PRKCB
SRC	PRKCB
SOS1	PRKCG
RAF1	PRKCG
STAT1	PRKCG
TRAF2	PRKCG
ARAF	PRKCG
EGFR	PRKCG
STAT3	PRKCG
DVL2	PRKCG
PPP2CA	PRKCG
RIPK1	PRKCG
RASA1	PRKCG
CRK	PRKCG
SHC1	PRKCG
PEBP1	PRKCG
PTPN11	PRKCG
ITGB4	PRKCG
DOK1	PRKCG
PTPN6	PRKCG
DAB2	PRKCG
LYN	PRKCG
PLCG1	PRKCG
SRC	PRKCG
GSK3B	GLI1
TFAP2A	GLI1
RBBP7	GLI1
ARRB2	GLI1
BTRC	GLI1
PTCH1	GLI1
HDAC2	GLI1
SAP30	GLI1
CSNK1D	GLI1
CSNK1E	GLI1
FBXW11	GLI1
HHIP	GLI1
PTCH2	GLI1
DYRK1A	GLI1
GLI1	GLI1
TP73	E2F4
CAV1	E2F4
JUN	E2F4
NCOR2	E2F4
RB1	E2F4
SP1	E2F4
CDK1	E2F4
CDC25A	E2F4
MYC	E2F4
HDAC2	E2F4
E2F4	E2F4
CAV1	TFDP1
CCNE1	TFDP1
CASP7	TFDP1
CCNA2	TFDP1
CDK1	TFDP1
CDK6	TFDP1
MYC	TFDP1
CEBPB	TFDP1
TFDP1	TFDP1
BRCA1	TFDP2
CCND1	TFDP2
SMAD3	TFDP2
SMAD4	TFDP2
SP1	TFDP2
CDK2	TFDP2
CDK1	TFDP2
CDK4	TFDP2
RBL2	TFDP2
SMAD2	TFDP2
CDC25A	TFDP2
CDKN1A	TFDP2
MYC	TFDP2
TFDP2	TFDP2
ABI1	EGF
AKT1	EGF
STAT1	EGF
CTNNB1	EGF
RAB5A	EGF
RBBP7	EGF
ARF4	EGF
CAV1	EGF
CDC37	EGF
JUN	EGF
SMAD3	EGF
SP1	EGF
STAT3	EGF
UBE3A	EGF
SH3KBP1	EGF
PPP2CA	EGF
DNM1	EGF
RASA1	EGF
CBLB	EGF
SPRY2	EGF
ITGA6	EGF
CDC42	EGF
CDH1	EGF
MYC	EGF
PTPN11	EGF
HDAC2	EGF
SAP30	EGF
ITGB4	EGF
CSK	EGF
CTNND1	EGF
PTPN6	EGF
NOTCH3	EGF
LYN	EGF
FGR	EGF
HCK	EGF
YES1	EGF
PRKCA	EGF
PRKCB	EGF
ABI1	EPS8
SOS1	EPS8
RAB5A	EPS8
EGFR	EPS8
CDC42	EPS8
EGF	EPS8
EPS8	EPS8
TP73	HTT
AKT1	HTT
AKT2	HTT
DLG4	HTT
TFAP2A	HTT
ARF4	HTT
EGFR	HTT
CREBBP	HTT
NCOA1	HTT
NCOR2	HTT
RAC3	HTT
CAPN3	HTT
CASP3	HTT
RASA1	HTT
EP300	HTT
SH3GL3	HTT
MAPK3	INPPL1
SHC1	INPPL1
CSF2RB	INPPL1
INPP5D	INPPL1
TFAP2A	KRT17
EGFR	KRT17
JUN	KRT17
SP1	KRT17
EGFR	KRT18
SP1	KRT18
CDH1	KRT18
EGFR	KRT7
EGFR	KRT8
EGFR	NCK2
PAK6	NCK2
RAC3	NCK2
SRC	NCK2
NCK2	NCK2
SOS1	PIK3C2B
AKT1	PIK3C2B
STAT1	PIK3C2B
AKT2	PIK3C2B
EGFR	PIK3C2B
PTEN	PIK3C2B
STAT3	PIK3C2B
[truncated: 102,154 more rows]

## Sheet: HumanNet
geneA	geneB
GATC	QRSL1
PSPN	GFRA4
METTL3	METTL14
TEN1	CTC1
CCM2	KRIT1
CTDNEP1	CNEP1R1
AP5M1	AP5B1
OIP5	MIS18A
IL11	IL11RA
TTC30B	B9D2
NPTXR	NPTX2
GINS2	GINS4
GINS3	GINS1
PEX19	PEX3
NCAPH2	NCAPG2
KCNIP2	KCNIP1
VPS36	VPS25
LAMTOR2	LAMTOR3
SNF8	VPS36
CDC26	CDC16
FOXP4	FOXP2
KIF3A	KIFAP3
NSMCE1	SMC6
NSMCE1	NSMCE4A
SMC5	SMC6
NSMCE1	SMC5
NSMCE3	SMC6
POLR3C	POLR3GL
NAA50	NAA10
NSMCE1	NSMCE3
SNF8	VPS25
NSMCE1	NSMCE2
ICOSLG	ICOS
GALR1	GAL
BCKDHA	BCKDHB
NFYB	NFYC
COG5	COG7
CRYBA1	CRYBB1
CDAN1	ASF1A
POLR3F	POLR3GL
NSMCE2	SMC6
SGF29	ZZZ3
TEN1	STN1
KAT7	JADE1
JADE2	ING4
USF1	USF2
MSL1	MSL2
BCL9	PYGO2
UBA7	ISG15
TINF2	ACD
HAUS2	HAUS3
FOSL2	JUNB
HAUS4	HAUS2
CDAN1	ASF1B
GTF2H3	GTF2H5
SPC24	SPC25
GABPA	GABPB1
NCAPD3	NCAPH2
FAM160A2	HOOK3
VPS33B	VIPAS39
GEMIN7	GEMIN6
COG6	COG3
PPP4R2	PPP4R3A
CENPP	CENPO
ING4	MEAF6
GINS2	GINS3
MSL1	KAT8
GMPPB	GMPPA
YIPF3	YIPF4
SGF29	TADA2A
TDO2	ASMTL
LLGL2	PARD6B
OPRL1	PNOC
VPS26B	VPS29
SGF29	KAT14
KAT7	MEAF6
ASCC2	TRIP4
SNAPC1	SNAPC3
HAUS2	HAUS7
E2F6	L3MBTL2
DCP1B	EDC3
NBAS	RINT1
SNX6	SNX1
COMMD1	COMMD4
PHKA1	PHKG2
GINS3	GINS4
HAUS6	HAUS2
C8A	C8G
LIN9	MYBL1
VPS28	VPS37B
NFYA	NFYC
TRAK1	TRAK2
POLE3	CHRAC1
POT1	ACD
ATF7IP	SETDB1
L3MBTL2	PCGF6
PHC1	SCMH1
DCTN6	DCTN4
TIPIN	TIMELESS
NME5	DYDC2
AP1G1	AP1S2
NELFA	NELFE
VPS26B	VPS35
HAUS6	HAUS4
KAT7	JADE2
RALBP1	REPS1
PPP4R2	PPP4C
NCAPH	NCAPG
ARID2	BRD7
C1ORF116	HOMER1
HAUS6	HAUS7
AEBP2	EZH2
BIRC5	CDCA8
PPP4R2	PPP4R3B
PRKACB	PRKAR2B
COG5	COG4
NELFCD	NELFE
LIN9	LIN37
GTF2H3	GTF2H4
TSG101	MVB12A
LEO1	PAF1
BMX	STAT3
AEBP2	EED
POLR3F	POLR3D
HAUS1	HAUS4
EMC9	EMC2
PFDN4	VBP1
POT1	TINF2
NUP107	NUP37
GTF2H4	GTF2H5
NCAPD3	NCAPG2
AEBP2	SUZ12
NAA15	NAA50
PPIE	XAB2
DCTN2	DCTN4
PMF1	DSN1
TSG101	VPS37B
ANAPC4	CDC16
ZWINT	DSN1
45175	45176
SMC5	NSMCE2
ITGB3BP	CENPO
LLGL2	PARD6A
DRG2	RWDD1
HSPB8	HSPB7
MNAT1	CCNH
CENPP	CENPU
DIS3L	EXOSC1
AKTIP	HOOK3
PLXNC1	SEMA7A
PFDN1	PFDN4
SPC25	NUF2
BUB1	BUB3
NDC80	SPC24
COPS6	COPS7B
EXOSC7	EXOSC5
TUBGCP2	TUBGCP6
EXOSC7	EXOSC1
CPSF3	SYMPK
KAT7	JADE3
ANAPC10	CDC16
EXOSC8	EXOSC1
NAA15	NAA10
PMF1	MIS12
SMARCD1	SS18
SLU7	PPIL3
ERCC3	GTF2H5
TRAPPC3	TRAPPC2L
PAF1	CDC73
PPP1R10	TOX4
POLE	POLE2
ZWINT	NSL1
LEO1	CDC73
NSMCE4A	SMC6
COG5	COG3
ELL3	EAF1
EXOSC8	EXOSC5
DCTN1	DCTN4
PFDN2	PFDN4
NELFCD	NELFA
CDC16	CDC27
BTG1	CNOT8
NOL4L	CTBP1
ORC3	ORC2
MUS81	SLX4
PRKACB	AKAP1
MPHOSPH6	EXOSC3
POLR3F	POLR3C
CDK7	CCNH
MORF4L1	MRFAP1
EXOSC8	DIS3L
PCCA	PCCB
PHC1	PCGF2
ING4	JADE3
E2F6	TFDP1
45175	45171
EXOSC7	EXOSC9
TSN	TSNAX
SMARCB1	SS18
NDC80	SPC25
MIS12	DSN1
HAUS4	HAUS3
ARPC5	ARPC1B
EXOSC7	EXOSC3
VPS29	VPS26A
GTF2E1	GTF2E2
MPHOSPH6	EXOSC2
GTF2H1	GTF2H5
USP46	WDR20
ALPP	ALPPL2
SGF29	KAT2A
PHKA2	PHKG2
NXT2	NXF3
GTF2H1	GTF2H3
PRKCZ	PARD6B
MPHOSPH6	EXOSC8
NCAPH	NCAPD2
DDX39A	SARNP
LIN9	MYBL2
MPHOSPH6	EXOSC7
CRY1	PER1
NDC80	NUF2
CHMP4B	CHMP5
PSMC3IP	MND1
HYPK	NAA15
CCDC22	COMMD10
CXXC1	SETD1A
CPSF3L	INTS9
ARPC1B	ARPC2
GTF2H3	GTF2H2C
ACTR1A	DCTN4
DYNC1I2	DYNC1LI1
MSL2	KAT8
HAUS1	HAUS6
POLR3H	POLR3E
EXOSC7	EXOSC2
DRG1	ZC3H15
MAT2B	MAT2A
KIFAP3	KIF3B
MAU2	NIPBL
HAUS1	HAUS2
CHMP4B	CHMP3
MORF4L1	MRGBP
LSM6	LSM5
ARPC1B	ACTR2
TUBG1	TUBGCP6
MRGBP	MORF4L2
ARID2	PBRM1
BCOR	KDM2B
RABGGTA	RABGGTB
CPSF3	CPSF2
LEO1	CTR9
VPS28	UBAP1
EIF4E	EIF4EBP1
PFDN1	PFDN5
MITF	TFEB
DCTN4	ACTR10
VPS18	VPS33A
EMC8	EMC2
NUP88	NUP214
EIF4E	EIF4G1
EIF4E	EIF4G3
EXOSC7	EXOSC4
PAF1	CTR9
EXOSC1	EXOSC5
CDK4	CDKN2C
NFKBIA	REL
45174	45176
JADE2	MEAF6
DPF2	SS18
ANAPC10	CDC23
DIS3L	EXOSC7
EXOSC8	EXOSC2
ITGB3BP	CENPP
STN1	CTC1
GCLC	GCLM
JADE2	ING5
EXOC3	EXOC2
PTTG1	ESPL1
RBPJ	MAML1
MEAF6	ING5
POLR3A	POLR3E
NTS	NTSR1
MEAF6	BRPF1
NELFB	NELFE
SKA1	SKA3
BCOR	PCGF1
RAD18	UBE2A
MGA	L3MBTL2
COG5	COG1
AP5S1	AP5B1
AP5S1	AP5M1
GTF2H4	GTF2H2C
ARL2	PDE6D
CXXC1	ASH2L
TBC1D7	TSC1
UBA2	SAE1
EXOSC1	EXOSC9
ASF1A	HIRA
HAUS7	HAUS3
AKTIP	FAM160A2
WDR4	METTL1
EXOSC9	EXOSC5
VPS45	RBSN
DIS3L	EXOSC3
ZW10	KNTC1
CDC23	CDC16
POLR1D	POLR1C
DCP1A	EDC3
E2F6	TFDP2
HAUS5	HAUS2
SGF29	TADA2B
POLG2	POLG
ACTR1B	ACTR10
ANAPC1	CDC16
45178	45175
TUBGCP3	TUBGCP2
POLR3E	POLR3D
HAUS4	HAUS7
45180	45176
NAA16	NAA10
PACSIN2	PACSIN1
RFX5	RFXAP
CENPN	CENPH
IDH3A	IDH3G
LEO1	WDR61
PSMC2	PSMD5
CRY1	FBXL3
DPF2	SMARCD1
NAA35	NAA38
E2F6	PCGF6
COPS8	COPS7A
PHC1	CBX8
STAG2	RAD21
SMARCD1	SMARCD2
ANAPC2	CDC16
XAB2	ISY1
SNAPC1	SNAPC2
RUVBL2	DPCD
CDC73	CTR9
SYNCRIP	PRMT8
MPHOSPH6	EXOSC1
NSMCE4A	NSMCE3
DNAJC2	HSPA14
POLR1A	POLR1B
ARID1B	SMARCD1
CD3EAP	POLR1E
POLR3B	POLR3D
ACTR1B	DCTN4
COPS8	COPS7B
COG4	COG6
NSL1	DSN1
CHTF8	DSCC1
COPS7A	COPS2
DPF2	ARID1A
KANSL1	PHF20
HOMER3	HOMER1
TRMT61A	TRMT6
NFRKB	ACTR8
GSPT2	GSPT1
CENPK	CENPH
POLD1	POLD2
45171	45180
EMC3	EMC7
KAT7	ING5
ATG14	NRBF2
SOD1	CCS
KCNJ3	KCNJ5
EIF3K	EIF3L
ACTR1A	DCTN1
HEXIM1	HEXIM2
KDM2B	PCGF1
EXOSC7	EXOSC10
COPS3	COPS2
PHF12	GATAD1
LIN7C	CASK
TXLNB	TXLNA
MPHOSPH6	EXOSC5
ING4	JADE1
HAUS1	HAUS3
45177	45176
PAF1	WDR61
COG4	COG3
FNTA	FNTB
CDK4	CDKN2B
NSL1	MIS12
INO80E	ACTR5
MSL3	MSL2
SMARCD3	SMARCE1
PQBP1	WBP11
SPC25	DSN1
CENPI	CENPH
GINS4	GINS1
MORF4L1	MORF4L2
ANAPC16	ANAPC4
ARPC1B	ACTR3
CPSF4	FIP1L1
ASF1A	UBN1
SUCLG1	SUCLA2
PFDN1	PFDN2
SNAPC5	SNAPC1
MTMR9	MTMR7
PARVA	RSU1
DCTN2	DCTN1
SMARCC2	SMARCD3
COG5	COG6
PRKACB	PRKAR2A
SPC24	NUF2
GTF2A1	TBPL1
CNOT2	CNOT3
GTF2H1	GTF2H2C
PFDN6	VBP1
PRKAA1	PRKAB1
PRKAR2B	AKAP1
ANAPC2	ANAPC4
MPHOSPH6	EXOSC9
PSMC4	PSMD10
POLR3H	POLR3B
DPF2	SMARCB1
CDK9	CCNT2
RARA	RXRG
SMARCD1	DPF3
ERCC3	GTF2H3
SMARCD2	SMARCE1
STRADB	STK11
DPF2	SMARCE1
STAP1	SH3KBP1
KAT7	BRPF3
TINF2	TERF1
COMMD6	CCDC22
TFDP1	L3MBTL2
EXOSC8	EXOSC10
SMARCC2	SMARCD2
INO80	ACTR5
EXOC8	EXOC7
COPS7A	COPS3
BRD8	MORF4L1
LDHA	LDHB
S100A16	S100A14
DPF2	SMARCC2
MFAP1	PRPF38A
EXOC5	EXOC8
HAUS1	HAUS7
COMMD1	COMMD6
45177	45171
POLA1	PRIM1
INO80E	NFRKB
SGF29	TADA1
NFRKB	INO80
DCTN6	DCTN1
LRWD1	ORC2
CAPN7	IST1
TSEN15	TSEN2
INTS9	INTS4
INO80E	INO80
SS18	ARID1A
PFDN4	PFDN5
PSMD14	PSMD7
DPF2	BCL7C
EXOSC3	EXOSC1
PPP3CA	PPP3R1
SSBP3	LDB1
RRAGA	RRAGC
WDR82	TOX4
RINT1	ZW10
EIF4E	EIF4EBP2
MAPK14	MAPKAPK3
NFRKB	ACTR5
BRD7	PBRM1
MEAF6	KAT6A
CKS1B	CCNA2
TLE3	TLE4
MCTS1	DENR
SGF29	SUPT20H
EIF2B1	EIF2B5
ARID1A	BCL7C
DAXX	ATRX
FBRS	PCGF5
ZWINT	KNL1
CLEC4M	CD209
PFDN1	VBP1
CENPP	CENPQ
DPF2	SMARCD2
HUS1	RAD1
NUP133	NUP107
RALGAPB	RALGAPA2
DFFA	DFFB
GTF2H1	GTF2H4
EXOC8	EXOC6
GATAD2A	MBD2
CDK7	MNAT1
45171	45176
EIF3M	EIF3H
NSMCE2	NSMCE3
SMC5	NSMCE3
TADA3	MBIP
PFDN6	PFDN4
POLR1A	POLR1C
EXOSC3	EXOSC5
CCSER2	NDEL1
EXOSC2	EXOSC3
45178	45176
EXOSC3	EXOSC9
PARVB	ILK
SMARCA4	SS18
ARPC5	ARPC1A
TUBGCP2	MZT2B
MORF4L1	PHF12
SETD1B	CXXC1
SGF29	MBIP
BABAM1	BRE
EXOC3	EXOC4
EIF2B1	EIF2B2
PRKAR2A	AKAP1
TLK2	ASF1A
POLR3D	POLR1C
ACTR1B	DCTN2
PHC1	PHC3
ABI1	WASF2
VPS28	TSG101
IFNAR1	IFNB1
GATAD1	KDM5A
MED18	MED20
PPP1R10	WDR82
RMI2	RMI1
TLK2	ASF1B
NDEL1	DIXDC1
POLR3A	POLR3D
IMPDH1	IMPDH2
SUPT4H1	SUPT5H
EXOC1	EXOC2
CDK6	CDKN2C
DOCK8	LRCH3
SMARCE1	SS18
SMARCA2	DPF3
SMARCC2	SS18
DIS3L	EXOSC9
PRKAR2A	PRKAR2B
RABGEF1	RABEP1
TSEN54	TSEN2
SPC24	MIS12
PFDN6	PFDN1
COPS8	COPS3
SF3B1	SF3B5
USP22	ATXN7L3
TFE3	TFEB
BRD7	SMARCD1
TSPAN3	CLDN11
PFDN2	VBP1
ERCC3	GTF2H4
FUBP3	QKI
EZH2	EED
SMARCC1	DPF3
SMARCD1	BCL7C
DIS3L	EXOSC5
EIF3M	EIF3F
XIAP	CASP9
ACTR1A	DCTN2
EXOSC3	EXOSC4
BCL7A	SMARCA2
ABI1	NCKAP1
SMARCB1	DPF3
MEAF6	JADE3
NXT1	NXF3
MED18	MED27
NELFB	NELFA
ASCC3	ASCC2
GATAD2B	MBD2
FTH1	FTL
RACGAP1	KIF23
ADRM1	UCHL5
TAF6L	TADA1
THOC5	THOC1
ETFA	ETFB
HOOK1	AKTIP
RAB11FIP2	RAB11A
TUBGCP5	TUBGCP6
COG4	COG1
PSMA8	PSMB7
STK38L	MOB2
ZWILCH	KNTC1
WIZ	EHMT1
ZWINT	MIS12
TCEB1	TCEB2
EXOSC2	EXOSC9
MPHOSPH6	EXOSC4
NR1H3	RXRG
ARPC4	ARPC1B
DPP3	KEAP1
ANAPC4	CDC23
COPS6	COPS7A
DNTTIP1	ELMSAN1
KIF3A	KIF3B
EXOSC2	EXOSC5
YAF2	PCGF1
TADA3	SGF29
EXOSC1	EXOSC4
MPHOSPH6	EXOSC10
WDR48	USP46
GEMIN8	GEMIN7
GATAD2A	MTA3
PFDN6	PFDN5
WDR61	CTR9
45171	45174
MED18	MED13
YAF2	PCGF2
ARID1B	DPF2
THOC2	THOC1
CPSF3L	INTS4
45177	45180
AP1S2	AP1M1
POLR1D	POLR1B
45178	45171
MED19	MED20
POLR2D	POLR2G
UPF2	UPF3B
MBD3	GATAD2A
SMARCE1	BCL7C
HOOK2	AKTIP
SSBP2	SSBP3
SNAPC1	SNAPC4
MED18	CCNC
PRPF4	PRPF3
POLR2G	POLR2L
HOOK1	HOOK3
EIF3L	EIF3H
HSPBP1	HSPA2
MORF4L1	GATAD1
EIF3M	EIF3L
WDR48	WDR20
AEBP2	JARID2
PDCD10	STK24
KAT7	BRD1
BRD7	SMARCC2
POLR3A	POLR3H
EIF3F	EIF3H
EIF2B2	EIF2B5
TAF6L	SUPT3H
45178	45180
ACTR1B	DCTN1
COMMD1	COMMD10
DIS3L	EXOSC2
COG2	COG3
MED4	MED18
STK25	PDCD10
CDC23	CDC27
BRPF3	MEAF6
MAFF	BACH1
KLRK1	ULBP3
EXOSC2	EXOSC4
ARPC5	ARPC3
PARD6A	PRKCI
DKC1	NAF1
COPS4	COPS2
VPS28	MVB12A
AP4S1	AP4E1
BFSP1	BFSP2
MED18	MED22
ERCC1	ERCC4
RFC4	RFC5
EIF3M	EIF3E
MED19	MED27
ASF1B	HIRA
MED19	MED18
VPS26B	TBC1D5
EXOSC3	EXOSC10
EXOSC9	EXOSC4
PFDN5	VBP1
MAX	MXI1
SSBP4	SSBP3
ITGB3BP	CENPU
UBAP1	TSG101
HCFC2	KMT2A
TERF2IP	TERF2
TADA3	KAT2B
TAF9	TAF10
PIH1D1	RPAP3
MED8	MED18
COPS6	COPS2
EXOSC6	EXOSC9
ANAPC13	CDC16
COPS6	COPS3
ASF1A	NASP
COPA	ARCN1
CNOT1	CNOT7
ARPC2	ARPC1A
AP3S1	AP3D1
EXOSC1	EXOSC10
SMARCC1	BCL7C
G3BP1	USP10
CASP2	CRADD
RBBP5	ASH2L
SMARCA2	SMARCD3
MED22	MED10
GAL	GALR2
SSBP4	SSBP2
STAG2	SMC3
MED6	MED18
CPSF2	SYMPK
SMARCB1	BCL7C
STAG2	SMC1A
MGA	PCGF6
SGF29	YEATS2
EXOSC4	EXOSC5
EXOSC6	EXOSC2
GATAD2B	MTA3
MTA3	MBD2
EXOSC6	EXOSC5
PDS5B	SMC3
DIS3L	EXOSC4
MBD3	GATAD2B
MED21	MED7
JUNB	BATF3
VPS29	VPS35
RRM1	RRM2
AP2M1	AP2S1
PFDN2	PFDN5
MED19	MED13
THOC3	THOC5
EIF3C	EIF3H
POLR2G	RECQL5
STAG1	SMC3
INTS1	INTS12
LRP5	SOST
GEMIN8	GEMIN6
EIF3K	EIF3H
ARPC5	ACTR2
STRAP	GEMIN7
MED18	MED17
ILK	PARVA
TADA3	TADA2A
ANAPC5	ANAPC1
MED18	MED21
COPS4	COPS3
ARPC5	ACTR3
STAG1	SMC1A
POLR3G	POLR3D
MED22	MED7
BCL7A	SMARCA4
ARID1B	SMARCB1
MYBL2	LIN37
YAF2	BCOR
MED18	MED14
SMARCA4	DPF3
SRP68	SRP72
BUB1B	BUB3
RGS9BP	RGS9
EIF3L	EIF3F
CHAF1A	CHAF1B
ARPC3	ARPC5L
MSL3	MSL1
ILK	RSU1
MEAF6	JADE1
EIF3G	EIF3I
KAT6B	MEAF6
EXOSC10	EXOSC5
POT1	TERF1
ERCC3	GTF2H1
CDK19	CCNC
EIF3L	EIF3D
MED1	MED20
DYNC1I2	DYNC1LI2
COPA	COPB2
CXXC1	RBBP5
PRKAA2	PRKAB1
CPSF4	CPSF2
VPS35	VPS26A
WDR5	KANSL1
MLLT6	DOT1L
ARID1B	SMARCE1
ARPC4	ARPC5L
PSMB2	PSMB4
EXOSC6	EXOSC4
CDK8	CCNC
BCAS2	PLRG1
TAF1D	TAF1B
MED22	MED17
MED19	MED4
STAG2	PDS5A
MED18	MED24
SKIV2L	TTC37
MED19	MED7
MED18	MED29
MPHOSPH6	EXOSC6
EIF3E	EIF3H
USP25	SYK
MED1	MED18
SF3A1	SF3A3
EIF3D	EIF3F
FBXL5	SKP1
COPS8	COPS6
EIF3L	EIF3B
COMMD1	COMMD3
TADA1	SUPT7L
ARID1B	SMARCC2
EXOSC8	EXOSC7
OIP5	MIS18BP1
EIF3L	EIF3C
MED1	MED27
POLR1E	POLR1C
HAUS2	HAUS8
SMARCD1	ARID1A
PSMB4	PSMB7
TMED2	TMED4
ASF1A	ASF1B
SMARCA2	SS18
PSMD7	PSMD6
EXOC5	EXOC6
MED1	CCNC
EIF3E	EIF3CL
MED19	MED21
CCNB2	CDK1
MED6	MED19
MED8	MED19
DPF2	SMARCC1
CTBP1	LCORL
SPTSSB	SPTLC3
POLR2G	RPAP2
YAF2	PCGF6
RRM2B	RRM1
SGF29	SUPT7L
45175	45174
IK	SMU1
CNOT7	CNOT9
GYG1	GYS1
CTTNBP2NL	STRN
PRKACA	PRKAR2A
ARPC3	ACTR3
EIF3M	EIF3C
CDC73	WDR61
NAA30	NAA35
CDK8	MED13L
ARPC3	ARPC1B
MCM3	MCMBP
SMARCA4	BCL7C
PSMD12	PSMD6
GATAD2B	MTA2
SNRPE	SNRPF
MED16	MED18
EXOSC10	EXOSC4
MED1	MED13
MED19	MED17
ARPC4	ACTR2
EIF3B	EIF3I
EIF3M	EIF3K
BBS5	BBS1
PDS5A	SMC1A
MED12	MED13
ARPC2	ARPC5L
CKS2	CDK1
PDS5B	SMC1A
SGF29	TAF5L
MED18	MED12
MED19	MED14
PHC1	CBX2
EIF3E	EIF3L
SMARCC1	SS18
HAUS5	HAUS4
TUBGCP2	TUBGCP5
MMP9	TIMP1
PDS5A	SMC3
COPA	COPG1
MBD2	MTA2
PSMD14	PSMD12
EIF3L	EIF3A
COPS6	COPS5
ACTR3	ACTR2
DCTN2	DCTN3
EIF3E	EIF3F
RASSF1	STK4
KIF5B	KLC1
MED19	MED24
RFC2	RFC5
DPF2	SMARCA2
ARID2	BCL7C
COG6	COG7
EXOSC8	EXOSC3
TADA3	TADA1
STAG1	RAD21
EMSY	GATAD1
MED1	MED7
MBD3	MTA1
RPS14	TAF9
SMARCC1	ARID1A
DDX6	DCP1A
EIF3A	EIF3G
COG3	COG1
CLP1	PCF11
EIF3E	EIF3D
EIF3A	EIF3F
POLR2C	POLR2G
TEX10	WDR18
TADA1	TAF5L
ERCC3	GTF2H2C
CPSF4	WDR33
POLR1A	POLR2E
TUBGCP3	TUBGCP5
HDAC1	FAM60A
MED4	MED1
COMMD1	CCDC22
RASSF1	STK3
MED19	MED29
COPS7A	COPS4
SNX5	SNX1
RBBP7	HAT1
TMED10	TMED9
YAF2	RING1
MED19	MED1
AP3M1	AP3B1
PSMB2	PSMB5
PSMD7	PSMD12
SMARCC2	SMARCD1
SMARCD1	SMARCE1
PFDN2	URI1
ALDOA	ALDOC
ACTR2	ARPC2
EIF3K	EIF3E
ARID2	SMARCD1
PSMC1	PSMD5
BRD7	SMARCE1
PSMB1	PSMB4
EIF3E	EIF3B
EIF3A	EIF3D
CBX1	POGZ
EYA1	SIX1
PSMA1	PSMB4
ANAPC5	CDC16
COPS5	COPS7A
EIF3E	EIF3C
POLR2G	POLR2J
EID3	NSMCE3
ARPC3	ARPC2
DYNC1H1	DYNC1LI1
TMED2	TMED9
COPS5	COPS2
MED6	MED1
GOLGA2	GORASP1
EIF3B	EIF3G
SUZ12	PHF19
ATXN7L3	ATXN7
EIF3B	EIF3C
MED1	MED21
HPS5	HPS6
NUP98	NUP37
COPS5	COPS3
UBE2I	SUMO1
EPO	EPOR
MED8	MED1
NSMCE1	EID3
SH3KBP1	CAPZA2
CPSF1	CPSF3
POLR3C	POLR3D
EIF3A	EIF3B
EIF2B4	EIF2B2
TAF6L	KAT2B
CENPI	CENPM
FAM96A	CIAO1
SUZ12	EED
VPS37C	TSG101
KAT7	ING4
EIF3A	EIF3C
PRKACA	PRKAR2B
ANAPC7	CDC23
PPP2CB	PPP2R5D
HAUS6	HAUS3
WDR92	RPAP3
EIF3C	EIF3F
GPKOW	DHX16
PELP1	WDR18
PSMB5	PSMB7
EXOC7	EXOC6
MED1	MED17
SRPRB	SRPRA
SNRPD2	SNRPF
WDR5	KMT2D
MBD3	MTA2
COG6	COG1
MED16	MED19
SUPT16H	SSRP1
MED1	MED14
CHMP4A	SYT17
RARS	AIMP1
EIF3B	EIF3F
CKS1B	CDK1
SMARCC2	ARID1A
RAD18	SLF1
EIF3D	EIF3H
GTF2A1	GTF2A2
STK3	STK4
PPP1R18	PPP1CA
EXOSC6	EXOSC3
EIF3C	EIF3G
PELP1	NOL9
MED30	MED27
MTA3	MTA2
SMARCA2	SMARCD1
DCTN2	ACTR10
BARD1	BRCA1
ANAPC16	CDC27
NCBP2	PHAX
MED8	MED20
ARID1B	ARID1A
EIF3K	EIF3F
PSMB4	PSMB6
SMARCC1	SMARCD1
PHF12	MORF4L2
SEC23B	SEC24C
PSMC1	PSMD12
MED6	CDK8
RING1	PCGF6
TAF6L	ATXN7
TAF6L	SUPT7L
GTF3C5	GTF3C3
MED11	MED10
LSM5	LSM7
PSMB1	PSMB5
PSMD14	PSMD6
MRFAP1	MORF4L2
POP4	RPP25
MED21	MED12
EZH2	SUZ12
SMARCB1	SMARCD1
MED1	MED24
SMC1A	SMC3
ARPC5	ARPC4
EIF3E	EIF3A
SMARCC2	SMARCE1
ANKRD49	FKBPL
DLG1	LIN7C
PCGF2	CBX2
MED14	MED12
RFC2	RFC4
POLR1D	POLR3D
NPTXR	NPTX1
GALNS	NEU1
MAGOH	PYM1
CNOT1	CNOT3
MED1	MED29
EIF3K	EIF3A
CCDC6	PPP4R1
PRPF19	PLRG1
GMNN	CDT1
ARID1B	SMARCD2
PSMA7	PSMB4
SMARCC1	SMARCE1
MTA1	MTA2
MED8	MED27
VPS37B	MVB12A
EIF3A	EIF3I
PSMB4	PSMB5
TRAPPC8	TRAPPC2
PPP2CB	PPP2R5E
THOC2	THOC3
TMED10	TMED4
MED6	MED27
POGZ	CHAMP1
DPF2	SMARCA4
PRKCI	PARD6B
CCT7	CCT6A
DYNC1H1	DYNC1I2
POLR3A	POLR2H
PSMA4	PSMB4
AP1B1	AP1S2
RBBP7	MTA1
HAUS4	HAUS8
TEFM	KBTBD7
TMED2	TMED10
PSMA5	PSMB4
SMARCC1	SMARCC2
PPP2CB	PPP2R1B
EID3	SMC6
CCT8	CCT6A
MED17	MED27
CCT4	CCT6A
SMARCA2	SMARCE1
PSMA6	PSMB4
ARPC5	ARPC2
MCM3	MCM5
ARPC4	ARPC3
MSL3	KAT8
CCT7	CCT8
MED14	MED27
MED18	MED23
SMARCA2	SMARCC2
CDK8	MED27
CAPZA2	CAPZB
PSMD14	PSMD13
SMARCB1	SMARCD3
MED6	CDK19
CCT8	CCT5
CCT7	CCT4
PSMA1	PSMB5
PSMC1	PSMC4
SMARCB1	SMARCC2
MED1	MED12
PRKAA1	PRKAB2
TFDP1	PCGF6
FARSB	FARSA
CCNA2	PKMYT1
PPP1CC	PPP1R2
PSMD14	PSMD3
CDK9	CCNT1
ASF1A	HAT1
SMARCD3	ARID1A
MED27	MED12
PIGP	PIGA
PARD3	PARD6B
POLR1A	POLR1D
CCT7	CCT5
STAM	HGS
EXOC8	EXOC2
WDR5	CXXC1
KIF5A	KLC1
MED1	MED22
TSEN54	TSEN34
CPSF4	CPSF1
POLR2B	POLR2L
SMARCB1	SMARCE1
SMARCA4	SMARCD1
VPS39	VPS11
DDX6	EDC3
IFIT1	IFIT3
PHC1	RING1
PSMD14	PSMD11
EEF1A1	VARS
LSM5	LSM2
HDAC1	ELMSAN1
CAMK2A	CAMK2D
WDR5	MBIP
TADA3	TAF6L
PPP2R1A	PPP2R5D
STX7	SNAP29
PHC1	PHC2
COPS7B	COPS2
CDK8	MED18
HAUS1	HAUS5
PPP2R1A	PPP2R5C
TAF6L	TAF9B
PSMC5	PSMD6
LLGL1	PRKCI
MBIP	YEATS2
DPCD	RUVBL1
CDK19	MED12
SEC23A	SEC24C
RPAP3	URI1
IRF9	STAT2
BCOR	RING1
CDC26	FZR1
UBA2	UBE2I
TADA3	SUPT3H
SAE1	UBE2I
RUVBL2	DMAP1
MED6	MED8
MCM6	MCMBP
MTA3	CDK2AP1
MED29	MED20
PRKACB	PRKAR1A
PFDN2	PDRG1
EXOC5	EXOC3
POLR2C	POLR2L
CENPI	CENPK
SMARCC1	SMARCD3
ARID1B	SMARCC1
MED16	MED1
PPP1CC	PPP1R8
PDCD10	STK26
ARPC4	ARPC2
ARPC4	ACTR3
PSMD14	PSMC5
SIN3B	GATAD1
UBLCP1	PSMD2
MED19	MED13L
SNRNP70	GEMIN2
PSMC1	PSMC2
DMAP1	RUVBL1
GRK2	GRK3
SMARCA2	SMARCC1
MBD3	MTA3
PRPF31	PRPF4
PSMA2	PSMB4
AP2S1	AP2A1
DYNC1H1	DYNC1LI2
PSMC1	PSMC5
MED8	MED11
SGF29	SUPT3H
VPS11	VPS16
ARID1B	SMARCA2
TADA3	SUPT7L
POLA2	PRIM1
SMARCB1	SMARCD2
CDK2AP1	MBD2
BRD7	BCL7C
CDK8	MED12
AFF4	MLLT1
MED8	MED17
CDK8	MED21
BCAS2	PRPF19
POLR3H	POLR3D
KIF5C	KLC1
SF3B2	SF3B1
PSMA3	PSMB4
MED6	MED17
SMARCA2	SMARCD2
PSMC1	PSMC3
SMARCD2	ARID1A
MBD3	CDK2AP1
PLK1	ERCC6L
MED6	MED14
PSMD14	PSMD8
STRN	SLMAP
MED8	MED12
SMARCE1	ARID1A
CDK8	MED30
FRY	CDKL2
GUCA1A	GUCY2D
POLR2B	POLR2G
MED17	MED12
POLR2B	POLR2D
MED29	MED27
DDRGK1	CDK5RAP3
VAPB	VAPA
WDR48	USP1
MED14	MED17
COG4	COG7
KDM1A	RCOR3
NFRKB	UCHL5
SUZ12	C10ORF12
YAF2	FBRS
MED6	MED10
RPL36	RPL7A
CENPO	CENPU
ABI1	WASF1
PPP2CA	PPP2R5D
ECI2	ECH1
DDX6	DCP1B
SMG8	SMG9
PSMD13	PSMD6
MED10	MED20
RING1	L3MBTL2
COPS8	COPS2
CDK8	MED17
PSMB5	PSMB6
EIF4E	EIF4ENIF1
MCM2	MCM3
AP1S2	AP1G2
SMARCA2	ARID1A
TAF6L	TAF5L
POLR2C	POLR2D
AVP	AVPR1A
RASSF8	PARD3
SUPT3H	TADA2B
MAPRE1	DST
SF3B1	SF3B6
INTS3	NABP2
CDK8	MED10
VPS26A	TBC1D5
RPL7A	RPL15
PLRG1	CDC5L
POLR2E	POLR2H
CINP	ATRIP
AMOT	AMOTL1
SMARCB1	ARID1A
INVS	B9D2
ACTR3	ARPC2
PSMD8	PSMD6
PSMD14	PSMD10
ACTR1A	ACTR10
KIF5B	KLC2
CDK8	MED22
LSM3	LSM2
ANAPC7	ANAPC1
NFKBIA	RELA
CTBP1	CTBP2
ADRM1	PSMC1
PSMC1	PSMD7
RFC3	RFC4
PPP2R1B	PPP2R5D
C8A	C8B
PRPF3	SART3
CIART	CLOCK
EIF2B3	EIF2B2
RAD50	MRE11
MOB4	STRN
ATG14	BECN1
COPE	COPA
FAM96B	CIAO1
MOB4	STRN3
PRKAB1	PRKAG1
STK25	STK24
TAF1D	TAF1A
MED4	MED29
MED19	MED12
EIF3B	EIF3D
MORF4L1	KDM5A
KAT6A	ING5
MED6	MED29
POLR2E	POLR2L
CDK8	MED13
SMARCA4	SMARCD3
ARID1B	SMARCA4
CDK8	MED14
YIF1A	YIPF5
CDK8	MED1
PRKAG2	PRKAB2
CBX8	PCGF2
CDKN3	MS4A3
PSMD14	PSMC4
SF3B1	PHF5A
THOC2	THOC7
NFKBIB	REL
TUBGCP5	TUBGCP4
NUDT21	CPSF6
PHC1	BMI1
SMARCA4	SMARCD2
NCAPG	NCAPD2
LSM5	LSM3
PSMC4	PSMD6
SMC4	SMC2
RING1	PCGF1
PRPS1	PRPSAP1
MED8	MED29
ARID2	SMARCE1
PSMD3	PSMD7
MED30	MED21
EIF3G	EIF3H
TSEN15	TSEN54
SEC13	NUP37
PSMD14	PSMC6
CDK8	MED8
MED29	MED14
SMC4	NCAPG
MTF2	SUZ12
GPS1	COPS7A
SSBP2	LDB1
CDK8	MED20
TYR	TYRP1
KLRC2	KLRD1
STAMBP	CHMP1B
PSMD11	PSMD6
PSMA7	PSMB5
PSMA4	PSMB5
TAC3	TACR3
PSMD14	PSMC3
MED10	MED27
EXOC1	EXOC4
WDR5	YEATS2
POLR2B	POLR2C
SENP3	WDR18
POLR2E	POLR3D
PSMD14	PSMC2
PSMD1	PSMD6
PSMA6	PSMB5
PPP2R1A	PPP2R5E
MFN1	MFN2
PSMB1	PSMB7
SMARCA4	ARID1A
PSMD14	PSMC1
EIF3A	EIF3H
SCMH1	PCGF2
EIF3K	EIF3D
ASF1A	TLK1
PSMD14	PSMD1
TADA3	TAF9B
DCLRE1B	TERF2
PSMC6	PSMD6
RFC1	RFC4
DDA1	DCAF1
LSM6	LSM2
EDC4	EDC3
POMP	PSMB7
NPY2R	PYY
PSMD7	PSMD13
ARCN1	COPB2
PSMA5	PSMB5
PDE6D	RPGR
PCGF2	PHC3
LSM5	LSM4
PSMC3	PSMD6
CHD3	MTA3
CSNK2A2	PCGF5
SMARCB1	SMARCC1
MED29	MED24
PSMD3	PSMD6
MED29	MED17
NFKBIA	RELB
HMMR	BACH1
TADA3	YEATS2
DNTTIP1	HDAC1
MED9	MED21
PRKAG2	PRKAB1
EZH1	SUZ12
NCBP2	NCBP1
U2AF2	U2AF1
SMARCA2	SMARCB1
PSMB1	PSMB2
IL5	IL5RA
CHRNA4	CHRNB2
TSPAN12	FZD4
POLR2D	POLR2E
SF3A3	SF3A2
EIF3K	EIF3B
PDIA3	CALR
MED19	MED22
PSMB2	PSMB7
EHMT2	WIZ
MED10	MED21
ZWINT	SPC25
MAP3K4	GADD45B
CDC42EP1	CDC42
TEAD4	VGLL4
ADAMTS5	TIMP3
OPRM1	PENK
POLR1A	RPAP3
PSMA1	PSMB7
CDK8	MED28
MED11	MED22
PSMC1	PSMD8
PSMC1	PSMD13
STRAP	GEMIN6
OBP2A	OR1G1
GFRA3	ARTN
SYT14	SYT16
FLRT2	FLRT1
CX3CR1	CX3CL1
GPHB5	GPHA2
KLRF2	CLEC2A
TADA3	TAF5L
MED18	MED28
ARID4B	SAP130
POLR2C	POLR2H
WDR5	KDM6A
LARS	RARS
MED18	MED9
MED22	MED27
MED18	MED26
CEP290	IQCB1
MED13L	MED1
MRPL28	MRPL39
YAF2	PCGF3
MED4	MED12
RPP40	RPP21
POMP	PSMB1
STK4	RASSF2
MSH6	MSH2
YAP1	TEAD4
STK3	RASSF2
DROSHA	DGCR8
POLR2B	POLR2E
PSMC1	PSMD1
PSMC1	PSMC6
PPP4C	PPP4R3A
CGA	FSHB
PSMC1	PSMD11
COA3	SURF1
MED4	MED10
EXOC6	EXOC2
YAF2	PCGF5
THOC7	THOC5
PSMD7	PSMD11
MED14	MED21
RRAGA	RRAGD
PSMD4	PSMD6
PMPCA	PMPCB
MCM6	MCM7
MED21	MED26
TAF5L	ATXN7L3
RCC1	RAN
EIF3K	EIF3C
ZWINT	PMF1
BCAS2	CTNNBL1
SF3A1	SF3A2
TSEN15	TSEN34
MED28	MED21
MED18	MED30
MED6	MED21
HAUS7	HAUS8
PSMD14	PSMD4
TAF6L	TAF9
POLR3K	POLR3D
SUCLG2	SUCLG1
MLLT10	DOT1L
KARS	AIMP1
PSMC2	PSMD6
SIN3A	SAP130
PPP1CC	PPP1R7
ANAPC10	ANAPC2
MED19	MED11
COPA	COPB1
EIF3CL	EIF3A
CNOT7	CNOT3
TLE2	TLE4
CHD4	MTA1
MED4	MED21
MED19	MED26
MED18	MED10
CENPH	CENPL
POLR2H	POLR2I
NOL9	LAS1L
SMYD1	ADSS
EXOSC6	EXOSC1
CHRNA4	VSNL1
MED22	MED12
RFC1	RFC5
COPS7B	COPS3
UBR4	KCMF1
CCK	CCKBR
UCHL5	ACTR5
CDK2	CCNE2
PSMC1	PSMD3
WDR5	KMT2B
SNRPA1	SNRPB2
MED7	MED13
PPP6R3	PPP6C
TRAPPC8	TRAPPC12
PPP2CA	PPP2R5A
EIF3C	EIF3D
TP53RK	TPRKB
NSL1	KNL1
HTR1A	HTR1B
CAPN1	CAST
SMARCD1	ACTL6A
PSME1	PSME2
CDK8	MED9
LSM6	LSM8
DPF2	BCL7A
MED16	MED24
MED19	MED10
FOS	JUNB
PLXNA1	SEMA6D
PSMA2	PSMB5
PPP1CA	PPP1R8
USP18	ISG15
PSMC5	PSMD10
SMARCD1	SMARCD3
HLA-DOA	HLA-DOB
GIGYF2	EIF4E2
NUP133	NUP37
MED10	MED12
MED19	CCNC
RPL35	RPL23A
PSMC1	PSMD4
MED31	MED18
LRP6	SOST
DCP2	EDC4
SF3B3	SF3B1
COPG1	COPB2
PDHA1	PDHB
PSMB5	PSMC3
RAB11FIP1	RAB11A
MCM3	MCM6
COG8	COG1
PSMB5	PSMC4
SKIV2L2	EXOSC10
WDR5	SETD1A
MED20	MED12
OSGEP	LAGE3
HOXB8	PBX3
AP3S1	AP3M1
PRMT3	RPS2
LLGL2	PRKCI
KARS	AIMP2
COG3	COG7
SUZ12	PHF1
SNW1	PPIL1
USP22	ENY2
MED19	MED30
MED9	MED7
NACA	BTF3
MED31	MED7
PEX1	PEX6
ZXDA	ZXDC
PID1	CUBN
EMC3	EMC2
MCM2	MCM6
TAC1	TACR2
CUL5	RNF7
TADA1	TAF9
TUBGCP3	TUBGCP6
GMNN	CCNA2
PCID2	SHFM1
POLR2L	POLR1B
MED1	MED30
PSMC4	PSMC5
MED10	MED14
PSMC1	PSMD6
AP4B1	AP4E1
CDK8	MED4
GDI1	RAB9A
AP2M1	AP1B1
LRP4	SOST
PIK3R6	PDE3B
CCNC	MED12
HAUS5	HAUS7
ARID2	SMARCC2
MED10	MED17
PIH1D1	UXT
EIF2B1	EIF2B3
PBRM1	SMARCD1
PRPF6	PRPF3
SPTSSA	SPTLC3
RTF1	PAF1
NFYA	NFYB
MED16	MED29
HMG20A	HDAC1
OSGEP	GON7
MED19	MED9
ANAPC4	ANAPC1
COMMD6	COMMD3
MED6	CCNC
MED1	MED26
ARL3	RP2
TSEN34	TSEN2
PSMC5	PSMD12
EDIL3	CDKL1
DLD	OGDH
MRPL28	MRPL24
TLE2	TLE3
NUP62	NUP214
PPP1CB	PPP1R7
MED1	MED9
TAC1	TACR1
KATNB1	KATNA1
PSMC3	PSMD9
WDCP	RUVBL1
RBBP4	CDK2AP1
SASS6	STIL
PHF12	KDM5A
MAGOH	RBM8A
PSMB5	PSMC2
WDR5	KAT14
MED19	CDK19
LSM6	LSM4
NPY	NPY1R
RING1	PCGF2
AP2M1	AP2A2
MED31	MED1
COMMD1	COMMD8
RSPO1	ZNRF3
INHA	TGFBR3
KCNIP2	KCND2
SERGEF	DPH3
TTC8	BBS5
PSMD2	PSMD6
CD3EAP	POLR1C
CBX1	ADNP
PHC2	RING1
PSMD14	PSMB5
MBIP	TADA2A
PSMB5	PSMC5
NPY1R	PYY
VIP	VIPR1
SMARCC1	ACTL6A
BRPF3	ING5
AP2M1	AP2A1
MAPK14	MAPKAPK2
IL12B	IL12RB2
IL12B	IL12RB1
IL12A	IL12B
RTN4R	LINGO1
SLC39A1	SLC39A2
RAPGEF3	PIK3R6
MED19	MED28
CDK19	MED1
IGBP1	PPP2CA
FOSL2	JUND
EVL	ENAH
TRIM33	TRIM24
SEC31A	SEC13
PSMD12	PSMD13
CENPQ	CENPN
LIF	LIFR
PBX1	PKNOX1
CSNK1E	SNX24
PSMA1	PSMB2
HLA-DQA1	HLA-DQB1
DEFA3	DEFA1B
MEIS2	PBX1
MAPK14	ZFP36L1
CHMP4B	CHMP2B
MED1	MED10
SNRPD2	SNRPE
RPL36	RPL15
PSMD14	PSMA1
BRPF1	KAT6A
CENPQ	CENPU
MGA	MAX
MED8	MED10
MED8	MED7
NEGR1	NTM
COPB1	COPG1
PRKACA	PRKACB
COG3	COG8
PEX6	PEX26
PEX1	PEX26
EEF1D	VARS
HLA-DMA	HLA-DOA
CKB	ASB9
MED19	MED31
PSMA1	PSMB1
LIN37	LIN52
EDN1	EDNRB
ANAPC1	CDC27
SMARCA2	ACTL6A
PBRM1	SMARCC2
APBA2	NECAB3
KCNIP1	KCND2
KAT6B	ING5
PSMD11	PSMD12
MED14	MED7
CENPH	CENPM
TP53RK	GON7
MED14	MED24
MTX2	MTX1
EZH2	PHF1
CSF2	CSF2RA
FSHB	FSHR
NRBF2	BECN1
POLR1A	POLR2H
THOC2	THOC5
DCTN3	DCTN1
MED11	MED12
MED11	MED1
MED22	MED30
EIF3D	EIF3I
KCNJ11	ABCC8
EIF2S1	EIF2S2
EMC9	EMC3
POLR2C	POLR2E
CCR3	CCL11
CHMP4A	CHMP5
AFF4	ELL3
SART1	PRPF3
BRMS1L	SAP30
RPP40	RPP25
IL13	IL13RA1
EXOSC8	EXOSC9
ING2	FAM60A
MED26	MED7
MORF4L1	SIN3B
ZWINT	SPC24
WDR5	KMT2A
MED1	MED28
CBX7	BMI1
PPP1CA	TOX4
SGF29	KAT2B
KNG1	BDKRB1
MPHOSPH10	IMP4
TNNC1	TNNT2
GATAD2B	RBBP7
KLRK1	MICB
PPP2R1B	PPP2R5C
PHC2	PCGF2
PRPS2	PRPSAP1
MED28	CCNC
POLR2B	POLR2H
MED10	MED7
PRPF6	SART1
CD2BP2	PRPF6
MED9	MED12
IL6	IL6R
POLR2D	RECQL5
TUBGCP5	TUBG1
CNOT7	CNOT11
FANCB	FAAP100
DDX20	GEMIN6
IL12RB1	IL12RB2
IL12A	IL12RB2
IL12A	IL12RB1
USP20	CBX7
COPG1	ARCN1
KIF3A	KIF3C
WAPL	RAD21
NUP62	NUP88
MORF4L1	PALB2
HCFC1	CXXC1
KANK1	KIF21A
PFDN2	RPAP3
DDX20	GEMIN2
PHC1	RNF2
KANSL1	KAT8
IFNAR1	IFNW1
CPSF1	SYMPK
CIITA	ZXDA
HCFC2	ASH2L
MLXIP	MLX
PMM1	RAB6A
UPRT	PYROXD1
SEC13	SEC16B
PLP1	PTPRN
PRKAB2	PRKAG1
SUZ12	JARID2
COPS5	COPS7B
ELP3	ELP2
CDC42EP2	ARHGAP26
PSMA7	PSMB2
ENO2	ENO3
CDC26	ANAPC13
NSL1	SPC25
KIFAP3	NCF2
ZNF567	ZAK
RPS26	TSR2
SPC24	KNL1
FOXP1	FOXP2
ASCC1	ASCC2
KIF2A	LARP1B
SCAMP2	SCAMP1
ZHX3	NLK
COX17	KATNAL1
RNF25	UBE2D2
AZIN2	OAZ3
STK38L	MOB1B
VAC14	FIG4
QARS	RARS
PSMB5	PSMC1
PPP2CA	PPP2R5E
CHD4	GATAD2B
FZR1	CDC16
SETD1B	ASH2L
SRSF6	TRA2B
DDIT4L	SNRPG
CALCRL	RAMP1
BTN1A1	XDH
BRPF1	ING5
PIGP	PIGQ
AIMP2	AIMP1
LSM6	LSM7
LTA	LTB
KLRC2	TYROBP
SIRPB1	TYROBP
MED10	CCNC
INO80E	UCHL5
PSMA7	PSMB1
RAD51C	XRCC3
ARRB1	ARRB2
SAV1	STK4
PHF1	EED
WNT1	FZD8
TRPC6	TRPM2
SIN3A	ARID4A
KCNJ6	KCNJ9
YAF2	KDM2B
HLA-DMA	HLA-DOB
TAF1D	TAF1C
TRAPPC5	TRAPPC2
TAF5L	TAF9B
VPS37A	VPS28
GPAA1	PIGS
PPP1CA	PPP1R10
RHOA	FAM65B
ING5	JADE3
MED8	CCNC
MED9	MED22
CHD4	GATAD2A
AP2S1	AP2B1
ITGB7	MADCAM1
PSMC5	PSMD7
PIGA	PIGH
RNF25	UBE2E2
MAPK8IP2	MAPK8IP1
RCAN1	PPP3CA
PBRM1	SMARCE1
MED28	MED7
CDK8	MED19
PSMD14	PSMB4
MPHOSPH10	IMP3
PIGK	GPAA1
GRASP	GRM1
MED30	MED12
PNMA6A	PNMA1
PSMD1	PSMD12
POP4	POP5
BRD1	ING5
NOXA1	NOXO1
NOP56	FBL
DDIT3	LDOC1L
IARS	AIMP1
CDK8	MED11
EEF1G	VARS
TADA3	KAT2A
LAMP3	RAB9A
EIF3E	EIF3I
C5	C8B
BRD8	MRGBP
LRG1	ACVRL1
ASCC3	ASCC1
PAFAH1B1	PAFAH1B3
AP2M1	AP2B1
PSMA3	PSMB2
SNAPC2	SNAPC3
PIGH	PIGQ
PIGC	PIGQ
USP22	ATXN7
MEMO1	TACC1
PSMA6	PSMB1
ATP5B	ATP5C1
GABPB1	ADGRB2
FLNA	FLNB
PSMA4	PSMB1
PELP1	TEX10
ARHGEF7	ARHGEF6
DARS	AIMP1
POLR3H	POLR1D
BBS5	BBS7
GRIK2	GRIK5
CALCRL	CALCA
TNNC1	TNNI3
RUVBL1	ACTR8
TOB1	CPEB3
PSMA2	PSMB1
NTF3	NTRK3
MED8	MED22
POP7	RPP25
DCTN2	GADD45A
RAD50	NBN
VPS11	VPS18
IL4	IL13RA1
AP3S1	AP3B1
ANAPC13	ANAPC2
NDP	FZD4
AGT	AGTR2
WDR45	ATG2B
MED29	MED21
AP4B1	AP4M1
POLR2D	RPAP2
HDAC1	ZNF217
NOP56	NOP58
MBD3	RBBP7
NOTCH4	MAML3
XRCC6	WRN
TNNI3	TNNT2
SART1	PRPF4
PSMB4	PSMC5
GEMIN8	GEMIN2
COPS6	COPS4
PIGU	GPAA1
VEGFD	ITGA9
CDCA5	RAD21
LRG1	ENG
IL1B	IL1R2
PSMB2	PSMB6
ILK	LIMS1
HAUS1	HAUS8
TRRAP	SUPT7L
IL3	IL3RA
CGA	FSHR
KCNJ3	KCNJ9
TIMM8A	TIMM13
DDX20	GEMIN4
SLMAP	STRIP1
TAP1	TAP2
PSMC4	PSMD12
BCCIP	RPL23
NAT9	EEF1E1
TUBG1	MZT2B
RRM2B	RRM2
ZWILCH	ZW10
SUPT20H	ATG9A
ITGAE	ITGB7
PHC2	CBX8
DNMT3L	RSL24D1
BATF	JUNB
LLGL1	PARD6B
IFT27	HSPB11
NFYB	POLE4
HAAO	GAD1
ANXA10	EDC3
CACFD1	TMEM159
PSMC3	PSMC5
APPL2	RAB22A
KCNIP3	CD177
EPRS	KARS
RABAC1	NDRG2
E2F6	MGA
DPM3	DPM2
CDK19	MED18
TADA1	TRRAP
AHSP	ZC3H12A
C16ORF74	UNC119
APEH	IST1
CAPN1	CAPNS1
PRDX1	PRDX2
ATP2B2	CALCA
PSMA2	PSMB2
MED6	MED12
ZNF317	RBMY1A1
UBE2W	PSTPIP1
PIGA	PIGQ
IL1RAP	IL1R2
DCTN3	DCTN4
RAB27B	SYTL1
POP5	RPP25
EIF4H	C11ORF68
NUP62CL	OGT
TRIP6	PDLIM4
LYAR	PRKRA
CNKSR1	CYTH3
POP4	RPP14
CDK8	MED7
SKP1	KDM2B
[truncated: 156,500 more rows]

## Sheet: StringNet
geneA	geneB
ARF5	COPG1
ARF5	KIF19
ARF5	ANK1
ARF5	KIF18A
ARF5	TMED10
ARF5	KIF1A
ARF5	ARFGAP2
ARF5	DYNC1I2
ARF5	TMED7
ARF5	KIF2C
ARF5	COPA
ARF5	DYNC2LI1
ARF5	KIFAP3
ARF5	COPB1
ARF5	ARCN1
ARF5	COPE
ARF5	KIF1B
ARF5	ARFGAP1
ARF5	KIF4A
ARF5	CENPE
ARF5	SURF4
ARF5	KIF6
ARF5	KIF4B
ARF5	INS
ARF5	KIF16B
ARF5	CD59
ARF5	DYNC1I1
ARF5	KIF21A
ARF5	DCTN2
ARF5	KLC2
ARF5	KIF3C
ARF5	KLC4
ARF5	KIF2B
ARF5	KIF1C
ARF5	SPTBN1
ARF5	KIF20A
ARF5	KIF12
ARF5	YKT6
ARF5	DCTN5
ARF5	TMED2
ARF5	SPTB
ARF5	ARF4
ARF5	DYNC1H1
ARF5	KIF21B
ARF5	CD55
ARF5	KIF25
ARF5	KDELR3
ARF5	KIF26A
ARF5	KIF13B
ARF5	DYNC2H1
ARF5	KIF26B
ARF5	KIF3B
ARF5	DYNLL1
ARF5	KIF27
ARF5	RAB1B
ARF5	CYTH3
ARF5	KIF3A
ARF5	DCTN6
ARF5	SPTBN5
ARF5	CYTH1
ARF5	TMED9
ARF5	FOLR1
ARF5	KLC1
ARF5	KDELR1
ARF5	KIF11
ARF5	ETFA
ARF5	GBF1
ARF5	ANK2
ARF5	DCTN4
ARF5	KIF5B
ARF5	DCTN3
ARF5	KDELR2
ARF5	ARFGAP3
ARF5	SPTBN4
ARF5	KIFC2
ARF5	ANK3
ARF5	DYNC1LI2
ARF5	DCTN1
ARF5	KIF5A
ARF5	KIF23
ARF5	KIF2A
ARF5	BET1
ARF5	KIF20B
ARF5	RAB1A
ARF5	KIF15
ARF5	ARF3
ARF5	KIF22
ARF5	KLC3
ARF5	CYTH2
ARF5	SPTBN2
ARF5	ARF1
ARF5	AP1B1
ARF5	RACGAP1
ARF5	TMED3
ARF5	COPZ1
ARF5	SPTAN1
ARF5	COPB2
M6PR	AGTR1
M6PR	FNBP1
M6PR	HIP1
M6PR	AP2S1
M6PR	AP1M2
M6PR	RAB9A
M6PR	CD3D
M6PR	WNT5A
M6PR	NAPA
M6PR	VPS52
M6PR	ACTR3
M6PR	SLC2A8
M6PR	AP2A2
M6PR	PACSIN2
M6PR	CLTC
M6PR	FCHO2
M6PR	ARPC4
M6PR	STX16
M6PR	CBL
M6PR	SNX18
M6PR	REPS2
M6PR	VPS54
M6PR	RHOBTB3
M6PR	DNM2
M6PR	SCARB2
M6PR	UBC
M6PR	NAPG
M6PR	VAMP7
M6PR	IGF2R
M6PR	VPS51
M6PR	EPN1
M6PR	SYNJ1
M6PR	REPS1
M6PR	PICALM
M6PR	CHRM2
M6PR	RAB5C
M6PR	SYNJ2
M6PR	CTTN
M6PR	KIAA0319
M6PR	EGF
M6PR	ARPC1A
M6PR	CFTR
M6PR	STX10
M6PR	GAPVD1
M6PR	DVL2
M6PR	CD3G
M6PR	BLOC1S1
M6PR	ARPC3
M6PR	PIK3C2A
M6PR	NECAP1
M6PR	DNM1
M6PR	AGFG1
M6PR	TFRC
M6PR	ADRB2
M6PR	SLC18A3
M6PR	VTI1A
M6PR	CLTA
M6PR	TF
M6PR	FCHO1
M6PR	PLIN3
M6PR	RAB9B
M6PR	VAMP4
M6PR	EPS15
M6PR	GAK
M6PR	EGFR
M6PR	ITSN2
M6PR	FZD4
M6PR	AP1G1
M6PR	STON2
M6PR	CD4
M6PR	OCRL
M6PR	AMPH
M6PR	CLTB
M6PR	NECAP2
M6PR	BIN1
M6PR	WASL
M6PR	RAB5B
M6PR	AP1S2
M6PR	CTSZ
M6PR	GCC2
M6PR	AP2M1
M6PR	AP1B1
M6PR	SGIP1
M6PR	SH3GL1
M6PR	VAMP2
M6PR	LDLRAP1
M6PR	RAB5A
M6PR	TXNDC5
M6PR	DNASE2
M6PR	AP2A1
M6PR	ARRB1
M6PR	SYT2
M6PR	TGOLN2
M6PR	ACTR2
M6PR	GNS
M6PR	RPS27A
M6PR	PACSIN3
M6PR	TACR1
M6PR	NAPB
M6PR	DNAJC6
M6PR	HSPA8
M6PR	ARF1
M6PR	ARRB2
M6PR	UBQLN2
M6PR	AAK1
M6PR	RABEPK
M6PR	AVP
M6PR	SYT8
M6PR	EPN2
M6PR	UBB
M6PR	SH3GL3
M6PR	DAB2
M6PR	ARPC2
M6PR	SYT11
M6PR	NSF
M6PR	SH3GL2
M6PR	VPS53
M6PR	PACSIN1
M6PR	HIP1R
M6PR	VAMP3
M6PR	SYT1
M6PR	AVPR2
M6PR	TRIP10
M6PR	APOB
M6PR	LDLR
M6PR	SNX9
M6PR	SNAP91
M6PR	AP1S3
M6PR	LRP2
M6PR	SYT9
M6PR	VAMP8
M6PR	AP1M1
M6PR	AP1S1
M6PR	ARPC5
M6PR	ITSN1
M6PR	FNBP1L
M6PR	UBA52
ESRRA	NCOA1
ESRRA	ALAS1
ESRRA	PPARGC1A
ESRRA	MEF2C
ESRRA	PPARA
ESRRA	PPARGC1B
ESRRA	NRF1
ESRRA	MED1
ESRRA	MEF2A
ESRRA	ATP5F1B
ESRRA	MEF2D
ESRRA	CYCS
FKBP4	HSP90AA1
FKBP4	KLK3
FKBP4	HSF1
FKBP4	HSP90AB1
FKBP4	PTGES3
CYP26B1	CYP26A1
CYP26B1	UGT1A7
CYP26B1	CYP2A6
CYP26B1	UGT2B10
CYP26B1	UGT1A9
CYP26B1	UGT2B4
CYP26B1	CYP3A5
CYP26B1	UGT1A5
CYP26B1	CYP2C9
CYP26B1	CYP2C18
CYP26B1	AOX1
CYP26B1	CYP3A4
CYP26B1	CYP2B6
CYP26B1	UGT1A3
CYP26B1	UGT2B17
CYP26B1	UGT2A3
CYP26B1	CYP1A1
CYP26B1	UGT1A4
CYP26B1	ALDH1A2
CYP26B1	UGT1A1
CYP26B1	UGT2B7
CYP26B1	CYP26C1
CYP26B1	UGT2B15
CYP26B1	UGT1A8
CYP26B1	UGT1A10
CYP26B1	CYP3A7
CYP26B1	CYP2C8
CYP26B1	UGT1A6
CYP26B1	UGT2B11
CYP26B1	CYP1A2
CYP26B1	ALDH1A1
CYP26B1	CYP4A11
CYP26B1	CYP2S1
CYP26B1	CRABP1
NDUFAF7	MT-ND2
NDUFAF7	NDUFC2
NDUFAF7	ACAD9
NDUFAF7	NUBPL
NDUFAF7	NDUFB3
NDUFAF7	NDUFB10
NDUFAF7	NDUFA6
NDUFAF7	NDUFA10
NDUFAF7	NDUFV1
NDUFAF7	NDUFB2
NDUFAF7	NDUFB9
NDUFAF7	MT-ND1
NDUFAF7	NDUFA8
NDUFAF7	NDUFAB1
NDUFAF7	ECSIT
NDUFAF7	NDUFA2
NDUFAF7	MT-ND4
NDUFAF7	NDUFAF3
NDUFAF7	NDUFAF2
NDUFAF7	NDUFAF1
NDUFAF7	NDUFS2
NDUFAF7	NDUFS6
NDUFAF7	MT-ND5
NDUFAF7	NDUFA1
NDUFAF7	MT-ND6
NDUFAF7	NDUFS1
NDUFAF7	NDUFA5
NDUFAF7	NDUFB11
NDUFAF7	TMEM126B
NDUFAF7	NDUFS3
NDUFAF7	NDUFA11
NDUFAF7	NDUFS5
NDUFAF7	NDUFAF6
NDUFAF7	NDUFB1
NDUFAF7	NDUFA9
NDUFAF7	NDUFS7
NDUFAF7	NDUFAF4
NDUFAF7	NDUFA12
NDUFAF7	NDUFB8
NDUFAF7	NDUFB6
NDUFAF7	MT-ND3
NDUFAF7	NDUFV2
NDUFAF7	NDUFB7
NDUFAF7	NDUFV3
NDUFAF7	NDUFS8
NDUFAF7	NDUFA13
NDUFAF7	NDUFAF5
NDUFAF7	TIMMDC1
NDUFAF7	NDUFB5
NDUFAF7	NDUFB4
NDUFAF7	NDUFS4
NDUFAF7	NDUFA3
FUCA2	FUCA1
HS3ST1	SDC3
HS3ST1	GPC6
HS3ST1	GPC2
HS3ST1	GPC5
HS3ST1	HSPG2
HS3ST1	SDC2
HS3ST1	SDC4
HS3ST1	GPC1
HS3ST1	GPC4
HS3ST1	GPC3
HS3ST1	SDC1
HS3ST1	AGRN
SEMA3F	PLXNA3
SEMA3F	PLXNA1
SEMA3F	NRP1
SEMA3F	PLXNA2
CFTR	OCRL
CFTR	NECAP2
CFTR	PSMD9
CFTR	PSMB9
CFTR	AP2M1
CFTR	WNT5A
CFTR	PSMA4
CFTR	PSMA7
CFTR	PSME1
CFTR	EZR
CFTR	DNAJC6
CFTR	ARRB2
CFTR	PSMA3
CFTR	PSMD11
CFTR	SYT8
CFTR	AVP
CFTR	PACSIN1
CFTR	SH3GL2
CFTR	UBB
CFTR	HIP1R
CFTR	VAMP3
CFTR	PSMC4
CFTR	PSMB6
CFTR	F2
CFTR	OS9
CFTR	ARPC5
CFTR	SYT9
CFTR	PSMC2
CFTR	PSMA1
CFTR	PRKAB2
CFTR	HIP1
CFTR	SLC2A8
CFTR	CLTC
CFTR	DERL1
CFTR	CBL
CFTR	REPS2
CFTR	PSME2
CFTR	PRKACA
CFTR	YWHAZ
CFTR	VCP
CFTR	PRKAG2
CFTR	AP2S1
CFTR	ACTR3
CFTR	UBC
CFTR	PSMC1
CFTR	DNM2
CFTR	CTTN
CFTR	ERLIN2
CFTR	SYNJ1
CFTR	VAMP7
CFTR	PSME3
CFTR	USP10
CFTR	AGT
CFTR	ARPC3
CFTR	PSMC3
CFTR	TFRC
CFTR	PRKAR1A
CFTR	CCL11
CFTR	PSMF1
CFTR	SCARB2
CFTR	STON2
CFTR	GAK
CFTR	CLTB
CFTR	PRKAB1
CFTR	PSMB4
CFTR	PSMD4
CFTR	RHOQ
CFTR	RAB5A
CFTR	AP2A1
CFTR	TACR1
CFTR	PRKAR1B
CFTR	ACTR2
CFTR	RPS27A
CFTR	UBQLN2
CFTR	REPS1
CFTR	SLC18A3
CFTR	ARPC1A
CFTR	EGF
CFTR	DVL2
CFTR	CD3G
CFTR	PIK3C2A
CFTR	AGFG1
CFTR	SEL1L
CFTR	CLTA
CFTR	PSMD3
CFTR	PSMB5
CFTR	FCHO1
CFTR	CD4
CFTR	BIN1
CFTR	WASL
CFTR	RAB5B
CFTR	PSMA8
CFTR	PRKACG
CFTR	AMPH
CFTR	PSMD10
CFTR	PSMB7
CFTR	PSME4
CFTR	PRKAG1
CFTR	PSMC5
CFTR	PSMA5
CFTR	TGOLN2
CFTR	HSPA8
CFTR	SH3GL1
CFTR	ERLEC1
CFTR	ARPC2
CFTR	SYT1
CFTR	PSMD14
CFTR	FNBP1L
CFTR	EDN1
CFTR	ERLIN1
CFTR	LRP2
CFTR	PSMD2
CFTR	ITSN2
CFTR	SYNJ2
CFTR	KIAA0319
CFTR	RNF185
CFTR	GAPVD1
CFTR	CXCL12
CFTR	PSMA6
CFTR	ADRB2
CFTR	NECAP1
CFTR	PSMB1
CFTR	SLC9A3R1
CFTR	TF
CFTR	DERL2
CFTR	PICALM
CFTR	DNM1
CFTR	VAMP4
CFTR	EPS15
CFTR	PSMD8
CFTR	EGFR
CFTR	FZD4
CFTR	DERL3
CFTR	PRKAR2A
CFTR	PRKACB
CFTR	PSMD7
CFTR	PSMD12
CFTR	RAB5C
CFTR	FLNA
CFTR	SNX18
CFTR	PSMB2
CFTR	SNAP91
CFTR	AAK1
CFTR	SNX3
CFTR	PSMC6
CFTR	PSMB11
CFTR	EPN2
CFTR	SYT11
CFTR	SNX9
CFTR	APOB
CFTR	LDLR
CFTR	TRIP10
CFTR	PSMD5
CFTR	ITSN1
CFTR	UBA52
CFTR	PRKAG3
CFTR	PSMD13
CFTR	PACSIN2
CFTR	SEM1
CFTR	FCHO2
CFTR	FNBP1
CFTR	CD3D
CFTR	AP2A2
CFTR	PRKAA2
CFTR	ARPC4
CFTR	CHRM2
CFTR	RNF5
CFTR	SYT2
CFTR	EPN1
CFTR	VAMP2
CFTR	GNGT1
CFTR	IGF2R
CFTR	PSMD6
CFTR	ARRB1
CFTR	PRKAA1
CFTR	PSMB8
CFTR	PACSIN3
CFTR	LDLRAP1
CFTR	SGIP1
CFTR	PSMB10
CFTR	PRKAR2B
CFTR	SH3GL3
CFTR	PSMD1
CFTR	AVPR2
CFTR	DAB2
CFTR	VAMP8
CFTR	GOPC
CFTR	AGTR1
CYP51A1	NFYC
CYP51A1	MSMO1
CYP51A1	FDFT1
CYP51A1	NFYB
CYP51A1	SIGMAR1
CYP51A1	LSS
CYP51A1	DHCR24
CYP51A1	TM7SF2
CYP51A1	PRPF19
CYP51A1	SREBF2
CYP51A1	LBR
CYP51A1	SC5D
CYP51A1	NFYA
CYP51A1	SP1
CYP51A1	HSD17B7
USP28	PFAS
USP28	CLSPN
USP28	MYC
PDK4	DLAT
PDK4	DLD
PDK4	PDHA1
PDK4	PDHX
PDK4	PDHB
CCL26	CXCR6
CCL26	CCR5
CCL26	CCR8
CCL26	CCR3
CCL26	XCR1
CCL26	CXCR1
CCL26	CCR7
CCL26	CCR2
CCL26	CCR1
CCL26	CCR9
CCL26	CCR10
CCL26	CCR4
CCL26	CXCR3
CCL26	CXCR2
CCL26	CXCR4
CCL26	CCR6
CCL26	CXCR5
CCL26	CX3CR1
USH1C	LIN7A
USH1C	CNTN2
USH1C	CDH23
USH1C	TAX1BP3
RALA	EXOC1
RALA	RAB4A
RALA	MAPK14
RALA	EXOC4
RALA	MAPK11
RALA	LETM1
RALA	KRAS
RALA	STX4
RALA	RAC1
RALA	RAB11A
RALA	MYO1C
RALA	RHOQ
RALA	PLD2
RALA	MYH10
RALA	MYH7B
RALA	NRAS
RALA	KIFAP3
RALA	C2CD5
RALA	MYH13
RALA	NDUFS6
RALA	RAB13
RALA	MYO5A
RALA	EXOC3
RALA	SNAP23
RALA	RALGAPB
RALA	MAPK13
RALA	RGL2
RALA	RAB10
RALA	ASPSCR1
RALA	MSLN
RALA	MAPK12
RALA	RALBP1
RALA	MYH15
RALA	MYH4
RALA	SLC2A4
RALA	SRC
RALA	HRAS
RALA	EXOC6
RALA	RALGDS
RALA	MYH1
RALA	RALGAPA2
RALA	MYH2
RALA	MYH6
RALA	MAPK9
RALA	MAPK10
RALA	RALB
RALA	RAB14
RALA	RAB8A
RALA	KIF3B
RALA	MYH7
RALA	EXOC7
RALA	KIF3A
RALA	PLD1
RALA	STXBP3
RALA	EXOC5
RALA	RGL1
RALA	EXOC2
RALA	VAMP2
RALA	MYH8
RALA	MAPK8
BAIAP2L1	ROBO4
BAIAP2L1	IP6K3
BAIAP2L1	PRKAB2
CACNG3	AKAP5
CACNG3	CATSPER4
CACNG3	PRKACG
CACNG3	PPP2R1A
CACNG3	GRIA1
CACNG3	PPP2CA
CACNG3	RASGRP3
CACNG3	GRIA2
CACNG3	OLFM2
CACNG3	TRPC5
CACNG3	CAMK2A
CACNG3	PPP2R2A
CACNG3	CACNA1E
CACNG3	PRKACB
CACNG3	PDE4D
CACNG3	PPP2R1B
CACNG3	PPP1CC
CACNG3	CACNG7
CACNG3	LGI1
CACNG3	CATSPERB
CACNG3	OXTR
CACNG3	EPB41L1
CACNG3	PPP2R3A
CACNG3	PKD2L1
CACNG3	RYR2
CACNG3	CATSPER3
CACNG3	CACNB4
CACNG3	CACNA1B
CACNG3	CASQ2
CACNG3	CACNG2
CACNG3	RASGRF2
CACNG3	CACNG8
CACNG3	PPP2R3B
CACNG3	CACNG6
CACNG3	MICU1
CACNG3	CACNA2D3
CACNG3	HSPA2
CACNG3	GRIN3A
CACNG3	CACNG1
CACNG3	PPP2CB
CACNG3	PPP2R5B
CACNG3	ADAM22
CACNG3	RASGRP1
CACNG3	CACNA2D4
CACNG3	PPP2R5D
CACNG3	GRIN1
CACNG3	PPP2R3C
CACNG3	PTPA
CACNG3	CACNB2
CACNG3	PPP2R5A
CACNG3	CATSPERG
CACNG3	CAMK2G
CACNG3	CACNB1
CACNG3	CACNB3
CACNG3	GRIA4
CACNG3	CACNG4
CACNG3	MCUB
CACNG3	RASGRF1
CACNG3	CACNA1S
CACNG3	ASPH
CACNG3	MCU
CACNG3	CACNA2D1
CACNG3	PPP2R5C
CACNG3	CACNA1D
CACNG3	CAMK2D
CACNG3	MICU2
CACNG3	AKAP6
CACNG3	RASGRP2
CACNG3	FKBP1B
CACNG3	MYO6
CACNG3	CACNG5
CACNG3	CNIH2
CACNG3	PRKACA
CACNG3	GRIN3B
CACNG3	PPP2R2C
CACNG3	CAMK2B
CACNG3	CACNA1F
CACNG3	PPP2R5E
CACNG3	PPP1CB
CACNG3	PPP1CA
CACNG3	PPP2R2B
CACNG3	GRIN2A
CACNG3	CACNA1H
CACNG3	CACNA1C
CACNG3	CACNA2D2
CACNG3	CATSPERD
CACNG3	CNIH3
CACNG3	RASGRP4
CACNG3	ADAM23
CACNG3	DLG1
CACNG3	PKD1L1
CACNG3	CATSPER1
CACNG3	SHISA9
CACNG3	SMDT1
DVL2	PSMB10
DVL2	SH3GL3
DVL2	CSNK1E
DVL2	WNT8B
DVL2	SYT2
DVL2	ARRB1
DVL2	EGFR
DVL2	LATS2
DVL2	DNM1
DVL2	WNT3A
DVL2	CTNNB1
DVL2	VAMP4
DVL2	PSMD8
DVL2	EPS15
DVL2	PSMD6
DVL2	FZD4
DVL2	PSMD7
DVL2	FZD2
DVL2	FZD10
DVL2	PSMD12
DVL2	FZD3
DVL2	VAMP2
DVL2	PACSIN3
DVL2	PSMB8
DVL2	LDLRAP1
DVL2	FZD6
DVL2	SGIP1
DVL2	FZD9
DVL2	ACTR3
DVL2	AVPR2
DVL2	PSMD1
DVL2	NOTCH1
DVL2	FRAT2
DVL2	DACT1
DVL2	DAB2
DVL2	VAMP8
DVL2	WNT5A
DVL2	AP2S1
DVL2	AGTR1
DVL2	CCDC88C
DVL2	NOTCH4
DVL2	PRKCB
DVL2	SYNJ1
DVL2	UBC
DVL2	DNM2
DVL2	LRP5
DVL2	PSMC1
DVL2	CSNK1G2
DVL2	CUL3
DVL2	VAMP7
DVL2	PSME3
DVL2	CTTN
DVL2	ARPC3
DVL2	PSMC3
DVL2	TFRC
DVL2	CTHRC1
DVL2	RAC2
DVL2	PSMF1
DVL2	MOB1A
DVL2	AP2A1
DVL2	STON2
DVL2	PFN1
DVL2	SENP2
DVL2	WNT11
DVL2	CLTB
DVL2	RAB5A
DVL2	CSNK1G1
DVL2	DVL3
DVL2	PSMB4
DVL2	BAMBI
DVL2	PSME4
DVL2	AGFG1
DVL2	ACTR2
DVL2	APC2
DVL2	PSMD4
DVL2	TACR1
DVL2	WNT4
DVL2	CSNK2A2
DVL2	RPS27A
DVL2	WNT5B
DVL2	UBQLN2
DVL2	PSMB2
DVL2	PSMC6
DVL2	PSMB11
DVL2	EPN2
DVL2	SYT11
DVL2	AAK1
DVL2	ROR2
DVL2	TRIP10
DVL2	SNX9
DVL2	APOB
DVL2	LDLR
DVL2	SNAP91
DVL2	UBA52
DVL2	PSMD5
DVL2	ITSN1
DVL2	KLHL12
DVL2	REPS1
DVL2	PSMD13
DVL2	PRKCG
DVL2	PACSIN2
DVL2	SEM1
DVL2	AMOTL1
DVL2	FCHO2
DVL2	RAC1
DVL2	SCARB2
DVL2	WWTR1
DVL2	CSNK2A1
DVL2	GNAO1
DVL2	VANGL2
DVL2	DAAM2
DVL2	ARPC1A
DVL2	EGF
DVL2	RHOA
DVL2	FZD7
DVL2	GSK3B
DVL2	CD3G
DVL2	PIK3C2A
DVL2	PSMB7
DVL2	CSNK2B
DVL2	SLC18A3
DVL2	CLTA
DVL2	PSMA8
DVL2	PSMB5
DVL2	PSMD3
DVL2	INVS
DVL2	FCHO1
DVL2	RAB5B
DVL2	CD4
DVL2	BIN1
DVL2	WASL
DVL2	RAC3
DVL2	PTK7
DVL2	AMPH
DVL2	PSMD10
DVL2	PRICKLE1
DVL2	MOB1B
DVL2	PIP5K1B
DVL2	SH3GL1
DVL2	PSMC5
DVL2	APC
DVL2	AXIN2
DVL2	HSPA8
DVL2	TGOLN2
DVL2	PSMA5
DVL2	NKD2
DVL2	SYT8
DVL2	FZD1
DVL2	ARRB2
DVL2	SYT1
DVL2	ARPC2
DVL2	PSMD14
DVL2	FNBP1L
DVL2	ITSN2
DVL2	PSMD2
DVL2	LRP2
DVL2	SNX18
DVL2	CD3D
DVL2	FNBP1
DVL2	FRAT1
DVL2	PRICKLE2
DVL2	ARPC4
DVL2	AP2A2
DVL2	DVL1
DVL2	LATS1
DVL2	GSK3A
DVL2	FZD8
DVL2	EPN1
DVL2	IGF2R
DVL2	CHRM2
DVL2	RAB5C
DVL2	KIAA0319
DVL2	SYNJ2
DVL2	CSNK1D
DVL2	GAPVD1
DVL2	NKD1
DVL2	WNT8A
DVL2	NECAP1
DVL2	PSMA6
DVL2	SMURF2
DVL2	PSMB1
DVL2	ADRB2
DVL2	GAK
DVL2	VANGL1
DVL2	TF
DVL2	PI4K2A
DVL2	OCRL
DVL2	PSMB9
DVL2	NECAP2
DVL2	PSMD9
DVL2	WNT1
DVL2	PSMD11
DVL2	PSMA4
DVL2	AP2M1
DVL2	PSMA7
DVL2	RBX1
DVL2	PSME1
DVL2	PRKCA
DVL2	DNAJC6
DVL2	PSMA3
DVL2	AVP
DVL2	PACSIN1
DVL2	GNAQ
DVL2	UBB
DVL2	HIP1R
DVL2	SH3GL2
DVL2	PSMC4
DVL2	VAMP3
DVL2	PSMB6
DVL2	AMOTL2
DVL2	LRP6
DVL2	ARPC5
DVL2	SYT9
DVL2	PSMC2
DVL2	HIP1
DVL2	PSMA1
DVL2	CLTC
DVL2	SLC2A8
DVL2	PARD6A
DVL2	FZD5
DVL2	CBL
DVL2	REPS2
DVL2	PSME2
DVL2	SMURF1
DVL2	NOTCH3
DVL2	AXIN1
DVL2	PICALM
RPAP3	RUVBL2
RPAP3	TTI1
RPAP3	PPP1CA
RPAP3	PIH1D1
RPAP3	PHLDA3
RPAP3	PPP1CC
RPAP3	RUVBL1
SKAP2	FYB1
SKAP2	CD47
SKAP2	SIRPA
CX3CL1	CCR8
CX3CL1	CCR3
CX3CL1	CXCR1
CX3CL1	CCR7
CX3CL1	CCR2
CX3CL1	CCR1
CX3CL1	XCR1
CX3CL1	CXCR6
CX3CL1	CCR9
CX3CL1	CCR4
CX3CL1	CCR10
CX3CL1	CXCR3
CX3CL1	CCR5
CX3CL1	CXCR2
CX3CL1	CXCR4
CX3CL1	CCR6
CX3CL1	CXCR5
CX3CL1	CX3CR1
CX3CL1	TP53
TRAPPC6A	GRIA1
TRAPPC6A	SERPINA1
TRAPPC6A	RAB1A
TRAPPC6A	SEC24A
TRAPPC6A	BET1
TRAPPC6A	TRAPPC10
TRAPPC6A	FOLR1
TRAPPC6A	TRAPPC2L
TRAPPC6A	MCFD2
TRAPPC6A	CTSZ
TRAPPC6A	SEC24B
TRAPPC6A	SEC16A
TRAPPC6A	STX17
TRAPPC6A	GOLGA2
TRAPPC6A	TRAPPC6B
TRAPPC6A	TMED2
TRAPPC6A	TRAPPC3L
TRAPPC6A	SEC23A
TRAPPC6A	SEC16B
TRAPPC6A	F8
TRAPPC6A	YKT6
TRAPPC6A	CTSC
TRAPPC6A	SEC24C
TRAPPC6A	TRAPPC4
TRAPPC6A	SEC13
TRAPPC6A	LMAN1
TRAPPC6A	SEC22C
TRAPPC6A	GOSR2
TRAPPC6A	SAR1B
TRAPPC6A	TRAPPC5
TRAPPC6A	SEC22A
TRAPPC6A	TFG
TRAPPC6A	LMAN2L
TRAPPC6A	TRAPPC9
TRAPPC6A	SEC24D
TRAPPC6A	F5
TRAPPC6A	CNIH1
TRAPPC6A	TGFA
TRAPPC6A	COL7A1
TRAPPC6A	SCFD1
TRAPPC6A	RAB1B
TRAPPC6A	LMAN2
TRAPPC6A	SEC31A
TRAPPC6A	CNIH2
TRAPPC6A	CD59
TRAPPC6A	CNIH3
TRAPPC6A	STX5
TRAPPC6A	TMED10
TRAPPC6A	TRAPPC3
TRAPPC6A	LMAN1L
TRAPPC6A	CSNK1D
TRAPPC6A	TRAPPC1
TRAPPC6A	SEC23IP
TRAPPC6A	TRAPPC2
TRAPPC6A	GORASP1
TSR3	DDX23
TSR3	SNRNP27
TSR3	PRPF4B
TSR3	PRPF8
NDUFAB1	NDUFC2-KCTD14
NDUFAB1	GCSH
NDUFAB1	NDUFA2
NDUFAB1	MT-ND4
NDUFAB1	MT-ND6
NDUFAB1	NDUFB11
NDUFAB1	SCLY
NDUFAB1	NFS1
NDUFAB1	LIPT2
NDUFAB1	ACAD9
NDUFAB1	NDUFA11
NDUFAB1	ACER1
NDUFAB1	NDUFA9
NDUFAB1	NDUFB1
NDUFAB1	NDUFS7
NDUFAB1	ETFRF1
NDUFAB1	NDUFA1
NDUFAB1	MT-ND5
NDUFAB1	NDUFS1
NDUFAB1	NDUFA5
NDUFAB1	NMRAL1
NDUFAB1	OXSM
NDUFAB1	NDUFS3
NDUFAB1	NDUFC2
NDUFAB1	TMEM126B
NDUFAB1	NDUFAF6
NDUFAB1	NDUFS5
NDUFAB1	NDUFA4
NDUFAB1	LYRM4
NDUFAB1	HTATIP2
NDUFAB1	MT-ND2
NDUFAB1	NDUFB8
NDUFAB1	NDUFA12
NDUFAB1	NDUFA7
NDUFAB1	NDUFB6
NDUFAB1	TIMMDC1
NDUFAB1	NDUFB5
NDUFAB1	MDH2
NDUFAB1	NDUFS4
NDUFAB1	NDUFAF5
NDUFAB1	NDUFAF4
NDUFAB1	MT-ND3
NDUFAB1	NDUFB7
NDUFAB1	NDUFV2
NDUFAB1	NDUFV3
NDUFAB1	NDUFS8
NDUFAB1	NDUFA13
NDUFAB1	FOXRED1
NDUFAB1	NDUFA3
NDUFAB1	MT-ND4L
NDUFAB1	NDUFB4
NDUFAB1	NDUFV1
NDUFAB1	NDUFB10
NDUFAB1	NDUFA10
NDUFAB1	NDUFA6
NDUFAB1	NDUFB9
NDUFAB1	NDUFB2
NDUFAB1	MT-ND1
NDUFAB1	NDUFB3
NDUFAB1	NDUFA8
NDUFAB1	ECSIT
NDUFAB1	NDUFAF3
NDUFAB1	ETFA
NDUFAB1	NDUFAF2
NDUFAB1	NDUFS2
NDUFAB1	NDUFS6
NDUFAB1	NDUFAF1
ITGA3	CHAD
ITGA3	PLAU
ITGA3	ITGA8
ITGA3	PARVA
ITGA3	ITGB1
ITGA3	COL6A1
ITGA3	COL9A2
ITGA3	ACTN2
ITGA3	ACTB
ITGA3	THBS2
ITGA3	LAMC1
ITGA3	ITGAD
ITGA3	ITGA1
ITGA3	BCAR1
ITGA3	ITGA5
ITGA3	ITGA9
ITGA3	COL6A5
ITGA3	FLNC
ITGA3	VWF
ITGA3	PARVB
ITGA3	PXN
ITGA3	ITGB8
ITGA3	COMP
ITGA3	ITGAV
ITGA3	LAMC2
ITGA3	ITGB6
ITGA3	COL1A2
ITGA3	LAMA3
ITGA3	PARVG
ITGA3	BSG
ITGA3	ACTN4
ITGA3	TYK2
ITGA3	COL4A2
ITGA3	JAK2
ITGA3	ADGRV1
ITGA3	ITGB4
ITGA3	TNR
ITGA3	LAMB1
ITGA3	THBS1
ITGA3	LAMB3
ITGA3	IBSP
ITGA3	VLDLR
ITGA3	LAMC3
ITGA3	SRC
ITGA3	LAMA2
ITGA3	ITGAE
ITGA3	IL23R
ITGA3	COL4A3
ITGA3	TNN
ITGA3	SPP1
ITGA3	ITGAX
ITGA3	TLN1
ITGA3	TNXB
ITGA3	COL4A1
ITGA3	TGFBI
ITGA3	ACTG1
ITGA3	CRK
ITGA3	ITGA11
ITGA3	COL4A5
ITGA3	COL9A3
ITGA3	PLAUR
ITGA3	ITGA4
ITGA3	IL23A
ITGA3	ITGB2
ITGA3	CRKL
ITGA3	RELN
ITGA3	LAMA4
ITGA3	COL6A6
ITGA3	FLNA
ITGA3	VASP
ITGA3	COL6A3
ITGA3	CSPG4
ITGA3	ITGA2
ITGA3	ITGAM
ITGA3	ACTN1
ITGA3	TNC
ITGA3	COL1A1
ITGA3	THBS4
ITGA3	ITGB7
ITGA3	COL6A2
ITGA3	LAMB4
ITGA3	COL4A4
ITGA3	FN1
ITGA3	IL12B
ITGA3	ITGAL
ITGA3	LRP8
ITGA3	FLNB
ITGA3	ITGB5
ITGA3	IL12RB1
ITGA3	LAMA1
ITGA3	COL18A1
ITGA3	COL9A1
ITGA3	COL4A6
ITGA3	AGRN
ITGA3	NID1
ITGA3	LAMA5
ITGA3	LAMB2
ITGA3	COL2A1
ITGA3	THBS3
ITGA3	PTK2
ITGA3	EGFR
TFAP2D	EP300
TFAP2D	KCTD1
TFAP2D	TFAP2B
TFAP2D	TFAP2C
TFAP2D	KCTD15
TFAP2D	CREBBP
TFAP2D	YEATS4
TFAP2D	CITED1
TFAP2D	CITED4
TFAP2D	CITED2
TFAP2D	TFAP2E
CRY1	CRY2
CRY1	PRKAB1
CRY1	BTRC
CRY1	RPS27A
CRY1	FBXL3
CRY1	UBB
CRY1	PER1
CRY1	PRKAG3
CRY1	UBA52
CRY1	PRKAB2
CRY1	PER3
CRY1	CLOCK
CRY1	PPP2R5E
CRY1	PPP1CB
CRY1	PPP1CA
CRY1	NPAS2
CRY1	PPP1CC
CRY1	PRKAG1
CRY1	BHLHE41
CRY1	CSNK1E
CRY1	ARNTL
CRY1	PRKAA2
CRY1	PRKAG2
CRY1	UBC
CRY1	PRKAA1
CRY1	PER2
CRY1	CSNK1D
CAMK1G	ATF6B
CAMK1G	CREB5
CAMK1G	CREB1
CAMK1G	CALML3
CAMK1G	ATF4
CAMK1G	CREB3L4
CAMK1G	ATF2
CAMK1G	CALM1
CAMK1G	CREB3L2
CAMK1G	CREB3
CAMK1G	ATF1
CAMK1G	NOS3
CAMK1G	CALML5
CAMK1G	CALML6
CAMK1G	CREB3L3
CD9	LY6G6F
CD9	SYTL4
CD9	IZUMO1
CD9	CYB5R1
CD9	PHACTR2
CD9	PCDH7
CD9	ITGA6
CD9	IZUMO2
CD9	IZUMO3
CD9	SELP
CD9	CD109
CD9	ITGA2B
CD9	IZUMO4
CD9	LHFPL2
CD9	APLP2
CD9	ITGB1
CD9	TMX3
CD9	CD36
CD74	HLA-DRB5
CD74	AP1M1
CD74	AP1G1
CD74	SEC24A
CD74	CTSH
CD74	AP1S2
CD74	LGMN
CD74	CTSD
CD74	HLA-DRA
CD74	CTSV
CD74	MIF
CD74	AP2M1
CD74	CTSL
CD74	SEC24B
CD74	HLA-DMB
CD74	AP2A1
CD74	ARF1
CD74	SEC23A
CD74	HLA-DQA2
CD74	AP1B1
CD74	HLA-DPB1
CD74	CD44
CD74	SH3GL2
CD74	SEC24C
CD74	CTSC
CD74	HLA-DOA
CD74	SEC13
CD74	AP1S3
CD74	SAR1B
CD74	CTSE
CD74	AP1S1
CD74	SEC24D
CD74	AP1M2
CD74	AP2S1
CD74	CLTC
CD74	AP2A2
CD74	HLA-DMA
CD74	DNM2
CD74	HLA-DRB1
CD74	HLA-DOB
CD74	CTSF
CD74	SEC31A
CD74	CANX
CD74	CTSS
CD74	CTSO
CD74	CTSK
CD74	DNM1
CD74	HLA-DPA1
CD74	CLTA
CD74	CTSB
CD74	CTSA
MGST1	ADH1A
MGST1	GGT6
MGST1	GSTA4
MGST1	GSS
MGST1	CYP2E1
MGST1	TXNDC12
MGST1	GGT5
MGST1	ALDH3A1
MGST1	ALDH1A3
MGST1	CYP2A6
MGST1	ADH6
MGST1	GSTP1
MGST1	GGT7
MGST1	CYP1A1
MGST1	GPX2
MGST1	GSTT2B
MGST1	ADH1B
MGST1	ADH4
MGST1	GSTK1
MGST1	GSTA5
MGST1	ALDH3B2
MGST1	CYP2C9
MGST1	EPHX1
MGST1	GPX8
MGST1	ADH5
MGST1	CYP3A5
MGST1	CYP2C19
MGST1	GSR
MGST1	GPX5
MGST1	GPX3
MGST1	CYP2C18
MGST1	GSTM4
MGST1	CYP2A13
MGST1	GSTO1
MGST1	GSTA2
MGST1	CYP3A4
MGST1	GGT1
MGST1	CYP2B6
MGST1	CYP2C8
MGST1	GSTM5
MGST1	HPGDS
MGST1	MGST3
MGST1	MGST2
MGST1	GSTM2
MGST1	GSTA1
MGST1	GSTO2
MGST1	GPX7
MGST1	GSTM1
MGST1	ADH7
MGST1	CYP2S1
MGST1	CYP1A2
MGST1	GPX1
MGST1	GSTM3
MGST1	GGH
MGST1	GPX4
MGST1	CYP2F1
MGST1	GSTA3
MGST1	GPX6
CPA1	CPA3
CPA1	CPA2
CPA1	FBN1
RANBP9	HRAS
RANBP9	TDGF1
RANBP9	GDNF
RANBP9	RMND5A
RANBP9	HGF
RANBP9	MET
RANBP9	GID8
RANBP9	MAEA
RANBP9	DCTN1
RANBP9	SFRP2
RANBP9	GLIPR1L2
RANBP9	RANBP10
RANBP9	SOS1
RANBP9	WDR26
CD4	PLCG1
CD4	DCLK2
CD4	CSK
CD4	FZD4
CD4	HLA-DRB5
CD4	CLTB
CD4	STON2
CD4	OCRL
CD4	BIN1
CD4	NECAP2
CD4	WASL
CD4	CD8B
CD4	RAB5B
CD4	HLA-DRA
CD4	ARHGEF12
CD4	AMPH
CD4	LCK
CD4	PAG1
CD4	ADAM20
CD4	AP2M1
CD4	PTPN6
CD4	SYT2
CD4	VAMP2
CD4	RAB5A
CD4	AP2A1
CD4	ARRB1
CD4	TRAT1
CD4	GRAP2
CD4	CLTC
CD4	ACTR2
CD4	AP2A2
CD4	SLC2A8
CD4	DNAJC6
CD4	SYK
CD4	PACSIN3
CD4	TGOLN2
CD4	TACR1
CD4	HSPA8
CD4	HLA-DQA2
CD4	RPS27A
CD4	UBQLN2
CD4	SH3GL1
CD4	LDLRAP1
CD4	SGIP1
CD4	ARRB2
CD4	CD247
CD4	SYT8
CD4	AVP
CD4	SYT11
CD4	HLA-DPB1
CD4	EPN2
CD4	IL31RA
CD4	AAK1
CD4	UBB
CD4	ARPC2
CD4	SH3GL3
CD4	APOB
CD4	PTPN22
CD4	PACSIN1
CD4	HIP1R
CD4	IGKV3D-7
CD4	SYT1
CD4	SH3GL2
CD4	VAMP3
CD4	AVPR2
CD4	VAMP8
CD4	LDLR
CD4	SNX9
CD4	TRIP10
CD4	LAT
CD4	HLA-DOA
CD4	SNAP91
CD4	DAB2
CD4	ZAP70
CD4	FNBP1L
CD4	ARPC5
CD4	ITSN1
CD4	SYT9
CD4	HLA-DQB1
CD4	UBA52
CD4	LRP2
CD4	MKL2
CD4	ITSN2
CD4	HIP1
CD4	PDCD1
CD4	AGTR1
CD4	AP2S1
CD4	FNBP1
CD4	WNT5A
CD4	CD3D
CD4	SNX4
CD4	ACTR3
CD4	IGLL5
CD4	SYNJ1
CD4	CTTN
CD4	PACSIN2
CD4	HLA-DMA
CD4	PTPN11
CD4	ARPC4
CD4	REPS2
CD4	CBL
CD4	HLA-DQA1
CD4	FCHO2
CD4	SNX18
CD4	HLA-DRB1
CD4	DNM2
CD4	PDCD1LG2
CD4	SCARB2
CD4	UBC
CD4	IGF2R
CD4	EPN1
CD4	REPS1
CD4	VAMP7
CD4	CD274
CD4	CHRM2
CD4	RAB5C
CD4	KIAA0319
CD4	SYNJ2
CD4	TFRC
CD4	ARPC1A
CD4	CD3E
CD4	EGF
CD4	HLA-DOB
CD4	PICALM
CD4	GAPVD1
CD4	PRKCQ
CD4	HLA-DPA1
CD4	IL16
CD4	LCP2
CD4	CD3G
CD4	AGFG1
CD4	CACNA1C
CD4	ARPC3
CD4	PIK3C2A
CD4	NECAP1
CD4	PTPRJ
CD4	DNM1
CD4	ADRB2
CD4	CD8A
CD4	SLC18A3
CD4	CLTA
CD4	DEFA3
CD4	VAMP4
CD4	TF
CD4	PTK2
CD4	FCHO1
CD4	EPS15
CD4	GAK
CD4	EGFR
PLEKHG6	RHOA
HIVEP2	BTRC
HIVEP2	FBXW11
PPP5C	HIST1H2BL
PPP5C	H2AFX
PPP5C	HRAS
PPP5C	HSP90AA1
PPP5C	RNF8
PPP5C	HERC2
PPP5C	NSD2
PPP5C	RNF168
PPP5C	RAF1
PPP5C	HIST2H2BE
PPP5C	SUMO1
PPP5C	MDC1
PPP5C	WIPI2
PPP5C	MAP3K5
PPP5C	HIST1H2BJ
PPP5C	PSPC1
PPP5C	HIST3H3
PPP5C	HIST1H2BK
PPP5C	ATM
PPP5C	TATDN1
PPP5C	HIST1H2BD
PPP5C	HIST1H2BN
PPP5C	HIST1H2BA
PPP5C	HSP90AB1
PPP5C	UBE2V2
PPP5C	TP53BP1
PPP5C	ARAF
PPP5C	NBN
PPP5C	KRAS
PPP5C	MRE11
PPP5C	BRAF
PPP5C	PIAS4
PPP5C	PPP5D1
PPP5C	UBE2N
PPP5C	YWHAB
PPP5C	KAT5
PPP5C	NRAS
NME1	TWISTNB
NME1	ADCY5
NME1	POLD4
NME1	CRIP1
NME1	ANP32A
NME1	PKLR
NME1	AK2
NME1	ENTPD1
NME1	PKM
NME1	NTPCR
NME1	POLR1B
NME1	POLR2L
NME1	CMPK2
NME1	HMGB2
NME1	AK9
NME1	GCH1
NME1	NPR2
NME1	RAC1
NME1	POLR3F
NME1	GUCY1A2
NME1	GUK1
NME1	AK5
NME1	POLE
NME1	POLR2C
NME1	POLR2E
NME1	ADCY7
NME1	ADCY9
NME1	POLR3A
NME1	PNPT1
NME1	POLR3D
NME1	PRDX5
NME1	POLR2G
NME1	CTPS2
NME1	APEX1
NME1	TIAM1
NME1	GUCY1A1
NME1	POLR2I
NME1	POLR3K
NME1	POLE3
NME1	POLR3G
NME1	ACTL6A
NME1	KAT5
NME1	MAX
NME1	HDDC3
NME1	RRM2
NME1	POLR3GL
NME1	ADCY8
NME1	PRIM1
NME1	AK1
NME1	ENTPD6
NME1	ITPA
NME1	GUCY2D
NME1	ADCY4
NME1	MYC
NME1	NUDT16
NME1	NQO1
NME1	ENTPD3
NME1	AK3
NME1	CTPS1
NME1	POLR2K
NME1	AK8
NME1	ENTPD4
NME1	POLR1C
NME1	MOCS1
NME1	GUCY1B1
NME1	ENTPD5
NME1	AK4
NME1	CDC42
NME1	POLD3
NME1	GUCY2C
NME1	ADCY6
NME1	CMPK1
NME1	DYNLL1
NME1	POLR3E
NME1	RRM2B
NME1	NPR1
NME1	DNM1
NME1	POLD1
NME1	DCTPP1
NME1	POLE2
NME1	POLR2J3
NME1	ADCY2
NME1	ADCY3
NME1	POLR2D
NME1	POLR2B
NME1	ARF6
NME1	POLR1E
NME1	ENTPD8
NME1	RUVBL1
NME1	GZMA
NME1	RRM1
NME1	SET
NME1	DTYMK
NME1	ENTPD2
NME1	ADCY10
NME1	AK7
NME1	POLR1A
NME1	POLR3B
NME1	POLA2
NME1	POLD2
NME1	ZNRD1
NME1	POLR2F
NME1	DNM2
NME1	POLR2J
NME1	GUCY2F
NME1	POLR3H
NME1	POLR3C
NME1	RUVBL2
NME1	NME2
NME1	CANT1
NME1	POLE4
NME1	DUT
NME1	POLA1
UBR7	THOC1
UBR7	THOC5
MAP4K5	TNFRSF1A
MAP4K5	TRAF2
MAP4K5	MAP3K1
MAP4K5	MAP3K7
MAP4K5	MAP3K5
MAP4K5	TRADD
ERCC1	POLR2K
ERCC1	UBB
ERCC1	DNA2
ERCC1	EME1
ERCC1	RMI2
ERCC1	RAD51
ERCC1	MNAT1
ERCC1	POLD4
ERCC1	RFC4
ERCC1	RAD1
ERCC1	ATRIP
ERCC1	CUL4B
ERCC1	PCNA
ERCC1	DDB1
ERCC1	RPA1
ERCC1	HUS1
ERCC1	CDK7
ERCC1	FAAP24
ERCC1	PHF21A
ERCC1	RBX1
ERCC1	TOP3A
ERCC1	RAD17
ERCC1	RFC3
ERCC1	CUL4A
ERCC1	GTF2H4
ERCC1	RPS27A
ERCC1	ERCC6
ERCC1	POLR2L
ERCC1	ERCC4
ERCC1	ERCC8
ERCC1	XPC
ERCC1	XRCC5
ERCC1	MRE11
ERCC1	BARD1
ERCC1	UBA52
ERCC1	FAAP20
ERCC1	PARP1
ERCC1	EP300
ERCC1	FANCC
ERCC1	FANCA
ERCC1	POLN
ERCC1	XRCC6
ERCC1	RMI1
ERCC1	XRCC4
ERCC1	RFC2
ERCC1	POLD3
ERCC1	FANCM
ERCC1	BRCA1
ERCC1	FAAP100
ERCC1	FAN1
ERCC1	PAXX
ERCC1	GTF2H1
ERCC1	EXO1
ERCC1	CENPS
ERCC1	DCLRE1A
ERCC1	MSH2
ERCC1	USP45
ERCC1	POLK
ERCC1	POLD1
ERCC1	POLE
ERCC1	POLR2C
ERCC1	FANCG
ERCC1	POLE2
ERCC1	POLR2E
ERCC1	RBBP8
ERCC1	UVSSA
ERCC1	CENPX
ERCC1	ATR
ERCC1	CHRAC1
ERCC1	PRPF19
ERCC1	MSH3
ERCC1	POLR2G
ERCC1	POLR2D
ERCC1	BLM
ERCC1	POLR2B
ERCC1	RHNO1
ERCC1	MSH6
ERCC1	FANCD2
ERCC1	RAD23B
ERCC1	CCNH
ERCC1	SWSAP1
ERCC1	ATP23
ERCC1	XAB2
ERCC1	RAD9B
ERCC1	TOPBP1
ERCC1	DCLRE1C
ERCC1	CHD1L
ERCC1	FANCL
ERCC1	BRIP1
ERCC1	SLX4
ERCC1	XPA
ERCC1	DCLRE1B
ERCC1	RAD9A
ERCC1	ZNF830
ERCC1	PARP2
ERCC1	FANCE
ERCC1	NHEJ1
ERCC1	POLR2I
ERCC1	RPA2
ERCC1	ERCC2
ERCC1	ATM
ERCC1	FANCI
ERCC1	POLE3
ERCC1	PRKDC
ERCC1	AQR
ERCC1	GTF2H2
ERCC1	CETN2
ERCC1	RFC1
ERCC1	KAT5
ERCC1	WRN
ERCC1	FANCF
ERCC1	UBE2T
ERCC1	POLD2
ERCC1	KDM1A
ERCC1	MUS81
ERCC1	USP7
ERCC1	POLR2F
ERCC1	RFC5
ERCC1	UBC
ERCC1	LIG4
ERCC1	DDB2
ERCC1	POLE4
ERCC1	RAD52
ERCC1	HMGN1
ERCC1	ERCC3
ERCC1	FANCB
ERCC1	PPIE
ERCC1	POLR2J
ERCC1	RPA3
ERCC1	TCEA1
ERCC1	ZSWIM7
ERCC1	ERCC5
ERCC1	GTF2H3
ERCC1	NBN
GPRC5A	ACTR2
HEBP1	TAS2R8
HEBP1	CCR2
HEBP1	TAS2R31
HEBP1	P2RY14
HEBP1	COTL1
HEBP1	CCL25
HEBP1	HCAR2
HEBP1	RXFP4
HEBP1	TAS2R14
HEBP1	DRD2
HEBP1	CCL27
HEBP1	ADCY9
HEBP1	ADCY5
HEBP1	C5
HEBP1	NPB
HEBP1	TAS2R50
HEBP1	GABBR1
HEBP1	CXCL8
HEBP1	NPY
HEBP1	PMCH
HEBP1	SSTR5
HEBP1	GALR2
HEBP1	INSL5
HEBP1	NPBWR1
HEBP1	PYY
HEBP1	S1PR1
HEBP1	GNG4
HEBP1	ANXA1
HEBP1	SST
HEBP1	OXER1
HEBP1	ADCY1
HEBP1	APLNR
HEBP1	GNG12
HEBP1	CASR
HEBP1	GPR18
HEBP1	PENK
HEBP1	SUCNR1
HEBP1	CXCL9
HEBP1	HRH3
HEBP1	ADCY2
HEBP1	TAS2R41
HEBP1	DRD3
HEBP1	CXCL6
HEBP1	LPAR3
HEBP1	CCL19
HEBP1	NMS
HEBP1	CXCL16
HEBP1	GAL
HEBP1	CCR8
HEBP1	BDKRB1
HEBP1	TAS2R38
HEBP1	OXGR1
HEBP1	NPBWR2
HEBP1	ADCY3
HEBP1	OPRM1
HEBP1	TAS2R1
HEBP1	GRM3
HEBP1	HTR1F
HEBP1	TAS2R10
HEBP1	MCHR1
HEBP1	GNG3
HEBP1	CCR3
HEBP1	CXCR1
HEBP1	PPY
HEBP1	GRM8
HEBP1	S1PR5
HEBP1	P2RY13
HEBP1	ADRA2A
HEBP1	S1PR2
HEBP1	GNG8
HEBP1	CXCL13
HEBP1	CXCL11
HEBP1	PNOC
HEBP1	ADRA2C
HEBP1	TAS2R42
HEBP1	GRM6
HEBP1	PPBP
HEBP1	NPY2R
HEBP1	GNG10
HEBP1	TAS2R43
HEBP1	C3
HEBP1	NPY4R
HEBP1	GNB3
HEBP1	OPRL1
HEBP1	NMUR2
HEBP1	GRM7
HEBP1	TAS2R5
HEBP1	GABBR2
HEBP1	ADCY6
HEBP1	CXCR3
HEBP1	CCR7
HEBP1	PTGDR2
HEBP1	CXCL10
HEBP1	KNG1
HEBP1	TAS2R40
HEBP1	GNAI2
HEBP1	NMUR1
HEBP1	TAS2R9
HEBP1	GNG2
HEBP1	GNGT1
HEBP1	PTGER3
HEBP1	TAS2R30
HEBP1	HTR1E
HEBP1	GNB5
HEBP1	OPRK1
HEBP1	GNB2
HEBP1	DRD4
HEBP1	AGTR2
HEBP1	MCHR2
HEBP1	GPR55
HEBP1	CHRM2
HEBP1	TAS2R20
HEBP1	OPRD1
HEBP1	CCR5
HEBP1	CCR1
HEBP1	NPW
HEBP1	TAS2R3
HEBP1	S1PR3
HEBP1	GNG7
HEBP1	MTNR1B
HEBP1	MTNR1A
HEBP1	NPY1R
HEBP1	P2RY4
HEBP1	P2RY12
HEBP1	CXCL2
HEBP1	FPR1
HEBP1	LPAR1
HEBP1	CNR1
HEBP1	HCAR3
HEBP1	FPR2
[truncated: 271,211+ more rows]
