# Supplementary material for: Exploring gene-patient association to identify personalized cancer driver genes by linear neighborhood propagation
Source: BMC Bioinformatics. 2024 Jan 22;25:34. doi: 10.1186/s12859-024-05662-4 (PMC10804660; doi:10.1186/s12859-024-05662-4)
Supplement: Supplementary file 4 — Additional file 4: The identified rare driver genes. [file 12859_2024_5662_MOESM4_ESM.xlsx]

## Sheet: Sheet1
Additional file 4. The identified rare driver genes.
BRCA	COAD	HNSC	KICH	KIRC	KIRP	LIHC	LUAD	LUSC	PRAD	THCA	UCEC
ABL1	ACTA1	ACTB	ARAP1	ABL1	ABL1	ABL1	ABCE1	ABL1	ABL1	ABL1	ACTG1
ACTB	ACTB	ACTN1	BRCA1	ACTG1	ACTB	ACTR3	ABL1	ABLIM1	AKT1	ACTB	AKT1
ACTG1	AIMP2	ANLN	CD55	ACTN4	AP3M1	AHI1	ACO2	ACTB	ANLN	ADAR	ALYREF
AKT1	AKT1	APP	CDKN1A	ACTR8	APP	AP1B1	ACTB	AES	AP1B1	AHNAK	ATF2
ANKRA2	ALG2	ARAP1	CREBBP	ANAPC7	ARAP1	APP	AFAP1	AFG3L2	AP2B1	AKT1	ATP5B
APC	ANKRA2	ARNT	CTNNB1	ANKRA2	ARRB1	ARAP1	AHR	AKAP8	APC	ARHGEF2	AURKA
ARAP1	APP	ARRB2	CUL7	AP3D1	ATF6	ARRB2	AKT1	ANKRA2	ATF2	ARHGEF7	AURKB
ARNTL	ASNS	ATM	FBXW7	APC	ATM	ATP1B3	ANAPC1	ATM	BRAF	ATM	BHLHE40
ARRB2	ATF6	BCLAF1	HNRNPU	AR	ATP5A1	ATP5B	AP2B1	ATP5A1	BRCA1	BRCA1	BIRC2
ATIC	ATP1A1	BMI1	HSP90AA1	ARAP1	BAG6	BRCA1	APC	AURKA	BYSL	BTRC	CANX
BATF2	ATP2B4	BRCA1	HSPA8	ASNS	BRCA1	CANX	APP	BARD1	CAMK2D	CAND1	CCT4
BCL2L1	ATP5A1	BTK	HSPD1	ATF4	CASP3	CCNA2	AR	BUB3	CAPZB	CBX2	CEP70
BCL6	ATP6V0D1	BUB1B	IFI16	ATIC	CDC5L	CCNB1	ARAP1	CAND1	CBX5	CCNT1	CIAO1
BRCA1	ATP6V1A	CAPZB	IKBKE	ATM	CLTC	CCT4	ARRB2	CASP8	CCNB1	CDC42	CSNK2A1
BYSL	AURKA	CCNB1	IRS1	ATP5A1	CUL1	CCT5	ATP2A2	CBLB	CDC20	CDC5L	CSNK2A2
CANX	BCL2	CCNE1	KDM1A	ATP5B	CUL3	CDC5L	ATP5B	CCNA2	CDC27	CEP152	DARS
CAPZB	BIN1	CCT5	LCK	BARD1	DHX9	CDK2	BACE1	CCNC	CDH1	CEP192	DAXX
CASP3	BRCA1	CDC42	MCM2	BRCA1	DRD4	CDKN1A	BCL2	CCT7	CDKN1B	CHEK1	ECH1
CASP8	BTF3	CDC5L	MED16	CAND1	EIF2S1	CEBPE	BCL2L11	CD2BP2	CEP89	CORO2A	GRB2
CAV1	BTRC	CDC6	NANOG	CAPZA1	EPAS1	CEP57	BRCA1	CD4	CIITA	CREBBP	GTSE1
CCNC	CCDC8	CDK9	PRKDC	CAPZA2	ERBB2	CEP63	BRD2	CD55	CLTC	CUL3	H2AFZ
CCR3	CDC5L	CDT1	RPGRIP1L	CASK	ESR1	CGN	BTN2A1	CDC20	CREBBP	DBN1	HAUS6
CDC5L	CDK2	CEBPB	SFPQ	CCNA1	FBXO6	CHUK	CAMKK1	CDC5L	CSNK2A1	DDX5	HDAC1
CDK2	CDK4	CENPJ	SH3KBP1	CCT4	FGFR1OP	CLTC	CASP3	CDT1	CSNK2A2	DERL1	HDAC2
CDKN2AIP	CDK7	CEP135	SIN3A	CDC5L	GAB2	COPS6	CBX3	CEBPB	CUL3	DRD4	HSPA1L
CEP128	CDKN1A	CHEK1	SIRT1	CDK2	GSK3B	CREBBP	CBX6	CENPJ	CUL7	DYNLL1	IKBKE
CEP72	CDX2	CIAO1	SMAD3	CDKN1A	HDAC5	CSNK2A1	CBX8	CEP250	DDX17	EED	IKBKG
CFL1	CDYL	CKS1B	SMARCA4	CEP290	HDAC6	CTBP1	CCT4	CEP57	DDX24	EEF1A1	KAT5
CHCHD10	CHUK	COPS5	SMARCB1	CFL1	HIST1H3A	CTR9	CD55	CEP70	DDX5	EIF3L	KPNA1
CHD4	CLK1	CPSF6	SRC	CLINT1	HIST2H2BE	CUL1	CDC27	CEP72	DEK	ESR1	LMNA
CHFR	CLTC	CRY1	TOMM40	CNOT1	HLA-B	CUL3	CDC5L	CLTC	DHX9	ETS1	LRRC49
COPS6	COQ9	CSNK2A1	UBC	COPS5	HNRNPAB	CUL4A	CDK1	COPS5	EGFR	EXOSC10	MAP2K1
COQ9	CRK	CSNK2A2		COPS7A	HNRNPC	CUL7	CDK13	CSNK1A1	EGR1	FGR	MAPK14
CREB1	CRKL	CTBP1		CSNK1A1	HNRNPU	DCTN1	CDKN2A	CSNK2A1	EP300	FN1	MAPRE1
CRNKL1	CSNK2A1	CTDP1		CTCF	IL6ST	DDIT3	CENPI	CTBP1	EPS15	FOXM1	MATR3
CSNK2A1	CSNK2A2	CTNNB1		CTNND1	IRS1	DDX1	CGN	CTR9	ESF1	HDAC5	MDM2
CSNK2A2	CUL3	CUL1		CUL3	JAK1	DDX56	CIAO1	CUL1	FBL	HIF1A	MLH1
CTBP1	CUL5	CUL2		CYFIP1	LRRK2	E2F1	COPS2	CUL2	FBXO6	HNF4A	NAP1L1
CTNNA1	CUL7	CUL3		DAB2	LYN	EAF1	COPS3	CUL7	FBXW11	HSP90AA1	NCL
CUL1	DBP	CUL5		DAXX	MAP3K7	EEF1A1	COPS5	DCTN1	FLNA	HSPA5	NPM1
CUL3	DCTN1	CUL7		DDB1	MAPK14	EGFR	COQ6	DCUN1D1	FLNB	HSPA8	PFDN5
CUL5	DDB1	DAXX		DDX24	MATR3	EXOC3	CREB1	DDX6	GATAD2B	INPPL1	PLK1
CUL7	DDX24	DDX1		DDX27	NEDD4	FBXW11	CSNK2A1	DHX15	GRB2	JAK2	POU5F1
DCLRE1C	DFFA	DDX23		DDX28	NFKB2	FTSJ3	CSNK2B	DHX9	GTF2B	KEAP1	PSMA3
DCN	DMAP1	DDX27		DISC1	NOTCH1	GNL3L	CTBP1	DRD4	HDAC3	KRR1	PSMB5
DDX23	DNAJC7	DHX9		DMAP1	NR3C1	GSK3A	CTNNA1	EEF1A1	HDAC6	LIG4	PSMC2
DDX3X	EEF1A1	DNMT3A		DNMT1	NTRK1	HDAC1	CUL1	EEF1D	HNRNPA1	MAP3K1	PTGES3
DOCK1	EFTUD2	DNMT3B		DNMT3A	PARD6B	HDAC3	CUL2	EFTUD2	HNRNPR	MAP3K3	PXN
DRD4	EIF4A3	DYNLL1		ECHS1	PLK1	HIST1H1C	CUL3	EGFR	HSP90AA1	MAPRE1	RAD51
E2F1	EIF6	EED		EEF1A1	PML	HNRNPA1	CUL4B	EIF2S1	HSP90AB1	MATR3	RAF1
E2F4	ENO2	EFTUD2		EGFR	PRKACA	HNRNPD	CUL7	EMD	HSPA8	MCM2	RAN
EEF1A1	EPB41L2	EIF2S1		ERBB2	RBM28	HNRNPM	CXXC1	ERBB2	HSPA9	MED23	RNF2
EEF1G	ERCC3	EIF4B		ERBB3	RELA	HSP90AA1	DBN1	ERG	IFI16	MED6	RNPS1
EFTUD2	ERF	ELK1		ERCC8	RIF1	HSP90AB1	DDX3X	EZH2	IRF9	MED9	RPA1
EGFR	EZH2	ENO1		ESR1	RPL11	HSPA5	DHX9	FBXO18	JUN	MYC	RPA2
EIF3A	FGFR1OP	EPAS1		ESR2	RPL26L1	HSPA8	DIS3	FOXK2	KAT5	NCL	RPA3
EMD	FHL5	ESR1		EZH2	RPL37A	IKBKB	DTL	FYN	KIF20A	NFATC1	RPL5
ERBB2	FMR1	EZH2		FASN	RPS2	IRF1	EAF2	GSK3B	KRT5	OFD1	RPS3A
ERBB3	FOXO1	FLNB		FBXW11	RUVBL2	IVNS1ABP	EEF1A1	H2AFX	LBR	PHGDH	RXRA
ERG	FYN	FN1		FBXW7	SFPQ	JUN	EEF1A2	HDAC1	LMAN1	PLEC	SIRT7
ESR1	G6PD	FUS		FOXS1	SH3KBP1	KAT2A	EGLN2	HDAC3	LMNA	PRDX1	SMAD2
EWSR1	GRB2	GAPDH		FTL	SMAD3	KAT2B	EIF3A	HGS	LTBR	PRMT2	SMAD4
FGFR1OP	GTSE1	GNAI3		FTSJ3	SMAD4	KPNA1	EIF4A1	HIST2H2BE	LYAR	PTEN	SNW1
FGR	H2AFY2	GSK3B		FUS	SMARCB1	KRAS	ELAVL1	HLA-B	MAP3K7	RARA	SP1
FLNA	HAUS8	GTF2B		GEMIN4	SMARCC1	KRT40	EMD	HMGB1	MCM2	RCC1	STAU1
FLNB	HDAC1	GTPBP4		GRB2	SNRNP70	LCK	ESR2	HNRNPA1	MCM3	RNF2	TIMM50
FN1	HDAC2	HDAC6		GSN	STAT5A	LYN	EZH2	HNRNPA2B1	MED23	SF3A1	TRAF6
FOXO1	HDAC5	HIST1H2AB		H2AFV	SUZ12	MAP2K1	FOXK1	HNRNPR	MPHOSPH10	SLC25A12	TUBB
FOXO3	HDAC7	HNRNPA1		HAUS8	SYNPO	MAP3K1	FOXM1	HNRNPU	MSH6	SMAD9	UBC
FOXO4	HIST3H3	HNRNPA2B1		HDAC1	TERF1	MAP3K7	FOXO1	HSP90AA1	MYH9	SMARCA4	UBE2I
FTL	HMGB1	HNRNPF		HDAC7	TNFAIP3	MAPK1	FUBP1	HSP90AB1	NCKAP1	SNRNP70	VAPA
GRB2	HMGB2	HNRNPK		HGS	TP53	MAPK14	FYN	HSPA1L	NCL	SOX2	VHL
GSK3B	HNRNPA0	HNRNPM		HIPK2	TRIM28	MAPK7	GRB2	HSPA5	NCOR1	SP1
GTF2F1	HNRNPK	HNRNPR		HNRNPA0	TSR1	MAPK9	GTF2F1	HSPB1	NFATC2	SPTBN1
H2AFY	HOXA1	HNRNPU		HNRNPH1	TUBA1B	MAPKAPK2	HADHA	HSPD1	NFKB1	SRC
HAUS6	HSP90AA1	HSF2BP		HNRNPM	TUBB4B	MAPT	HDAC11	IFI16	NOD1	SRRM2
HDAC1	HSP90AB1	HSP90AA1		HNRNPU	UBA2	MATR3	HDAC2	IKBKB	NUP107	SRSF5
HDAC2	HSPA5	HSP90AB1		HNRNPUL2	UPF1	MCM2	HDAC5	IKBKE	PAN2	STAT6
HDAC3	IFI16	HSPA8		HSP90AB1	VCP	MCM7	HDAC6	ILF2	PML	SYK
HDAC5	INPPL1	HSPH1		HSPA5	VHL	MDM2	HGS	KAT2B	POLR2B	SYNCRIP
HDAC6	ITCH	IGF1R		HSPA8	XPO1	MED29	HIST2H2BE	KRT13	PPM1G	TOP2A
HDGF	KAT5	ILF2		HTT	YEATS4	MRPS27	HLA-DPA1	KRT40	PPP1CA	TP53
HIST1H1C	KDM1A	IQGAP1		IKBKG		NBN	HNRNPA1	LCK	PRKCA	TPM3
HLA-B	KIF5B	IRS1		ILF2		NCOA1	HNRNPD	LMNA	PRPF3	TRAF1
HLA-C	KLC3	KAT5		ILF3		NCOA3	HNRNPF	LTBR	PRPF8	U2AF2
HMGXB4	KRT16	KDM1A		IPO5		NDEL1	HNRNPL	LYAR	PSMC5	UBC
HNRNPA1	L3MBTL1	KPNB1		IQGAP1		NDUFA13	HNRNPM	LYN	PSMD5	UPF1
HNRNPC	LMO4	KRT18		ITGB1		NEDD4	HNRNPR	MAPK3	PSME3	UQCRC2
HNRNPH2	LYN	LIMK1		KAT5		NELFB	HNRNPU	MAPK9	RAB5C	VCL
HNRNPL	MAP3K3	MAPK1		KIF11		NINL	HSP90AA1	MATR3	RAC1	VCP
HNRNPM	MAPK8	MAPK8		KIF14		NOS2	HSPA5	MCM2	RELA	VDAC3
HNRNPR	MAPKAPK3	MARK4		LMNA		NOTCH1	IFI16	MCM3	RPA1	YWHAE
HNRNPU	MCM2	MAX		LTBR		NRP1	IGF1R	MCM5	RPA2	YWHAG
HSP90AA1	MDM2	MCM2		MAP3K3		NTRK1	IGF2BP1	MLH1	RPL7
HSP90AB1	MED1	MCM5		MAPK3		NXF1	IKBKB	MRPL11	SEC23A
HSPA8	MED20	MDC1		MATR3		PAK1	ILF2	MRPL21	SF1
IFI16	MLLT6	MEN1		MCM7		PARP1	ILF3	MRPS9	SF3B1
IGF2R	MORF4L2	MET		MED12		PCM1	IPO5	MTA2	SHC1
IKZF1	NANOG	MIB1		MED13		PCNA	ITGB1	MYC	SIRT7
ILF2	NEFM	MKNK1		MED15		PIN1	IVNS1ABP	MYCN	SMAD2
ILF3	NFATC1	MMS19		MED6		PLD1	JAK1	MYO1C	SMAD4
INO80	NFKB1	MPG		MGA		PLD2	JUP	NCL	SMARCA2
IQCB1	NFKB2	MPHOSPH6		MYO1C		PPP2CB	KDM1A	NCOA3	SMARCC2
IQGAP1	NFKBIB	MSH6		NCOA6		PRKCQ	KPNA1	NF2	SMURF2
ITCH	NR5A2	MSN		NCOR1		PRKD1	KRT40	NFATC1	SNRPN
ITGB1	OFD1	MYC		NCOR2		PSMB5	LCK	NOP2	SNW1
JUN	ORC2	MYOD1		NFKB1		PSMG2	LMNA	NUP214	SP1
KARS	PAIP1	NCL		NFKBIB		PUF60	LYN	NXF1	SRSF1
KAT2A	PCNA	NCOA1		NOC2L		RAD51D	MAGOH	PARP1	SSH2
KAT2B	PHB	NCOA2		NOC4L		RASA1	MAP3K3	PAXIP1	STAT5A
KCNB1	PITX2	NCOA3		NONO		RBM39	MAPK1	PCM1	STAU1
KDM1A	PML	NEDD4		NOTCH1		RBPJ	MAPK14	PIAS2	SUMO1
KDM5A	POLR2A	NEDD8		NR4A1		RELA	MAPK3	PLRG1	SYK
KLC3	POLR2B	NFATC1		NUMA1		RIPK2	MCM2	PML	SYNCRIP
KLC4	PON2	NIN		NUP98		RNF2	MED14	PMS2	TERF2
KLF4	PPP1CC	NLK		NXF1		RPL23A	MEN1	POLR2A	THOC5
KPNB1	PPP2R5A	NOP56		OFD1		RPL4	MPHOSPH9	PPIB	TNK2
KRT16	PRKACA	NOP58		ORC2		RPL5	MRPL17	PRKAR1A	TOP1
KRT31	PRKCA	NPM1		PFDN4		RPS23	MRPL18	PRKCA	TRAF2
LGALS9	PRPF19	NUP98		PHF21A		RUVBL1	MSN	PRPF19	TRIM28
LMNA	PSAP	NUTF2		PML		SEC24C	MTA2	PRPF4	TRMT6
LTBR	PSMB6	OFD1		POLH		SH3KBP1	MYC	PRPF8	TUBG1
LUZP1	PSMC5	PABPC1		PPP2R1A		SHC1	MYO19	PSMB4	TUBGCP3
LYN	PSMD3	PABPN1		PRKACA		SKP1	NAP1L1	PSMC2	UBB
MAGOH	PSMD6	PAN2		PRPF19		SKP2	NDUFA12	PSMC4	UBC
MAP1B	PSMF1	PHGDH		PRPF4B		SMAD3	NFATC1	PSMC6	UBE2I
MAP3K3	PTK2	PIAS2		PSAT1		SNW1	NFKB1	PSMD11	UTP18
MAP4	RBM14	PIK3R1		PSEN2		SRC	NFRKB	PSMD3	VAPA
MAPK1	RBM39	PIN1		PSMA3		SRRM2	NOL6	PSMD6	VCP
MAPK14	RELA	POLR2A		PSMB7		STAT3	NOP2	PTPN11	XRCC1
MAPK3	RFX3	PPP2R1A		PSMD6		STK11	NOTCH1	PTPN5	XRCC5
MCM2	RNF2	PRKAB1		PTPN11		TBP	NPM1	PXN	XRCC6
MED14	RPA1	PRKACA		PTPN5		TCF3	NTRK1	RAD9A	YWHAH
MED23	RPA2	PRKCB		PXN		TFAP4	NUP43	RBBP7
MRPL13	RPAP1	PRKCD		RAC1		TPR	NUP62	RBM39
MRPL38	RPL31	PRKCZ		RAN		TRAF6	PAIP1	RBM4
MRPL42	RPL35	PSMA1		RANGAP1		TRAPPC3	PCM1	RBM8A
MTOR	RPRD1B	PSMC4		RAP1GAP		TRIM21	PHB2	RC3H1
MTX1	RPS3	PSMD11		RBM25		TRIM27	PHC1	REL
MYC	RPS6KA3	PSMD14		RBPJ		TRIM28	PIGS	RELA
MYLK	RUVBL1	PSMD8		RELA		TRRAP	PIK3R1	RFC1
NAP1L1	SART1	PSME3		RPA2		TSG101	PPP1CA	RPA1
NBN	SEC23A	PTBP1		RPA3		TUBA1B	PPP2R1A	RPA2
NCK1	SENP3	PXN		RPL18		TUBA1C	PRKCD	RPL14
NCL	SF3A1	RAB5C		RPL4		TUBG1	PRPF4	RPL23A
NEK6	SIRT1	RAD21		RPLP0		TUBGCP3	PSEN1	RPL5
NES	SIRT7	RAD23B		RPS13		UBC	PSMB1	RPL7A
NFKB2	SKP2	RARA		RSL1D1		UBE3A	PSMC4	RPLP0
NOS3	SLC25A12	RBL2		RUNX3		UCHL5	PSMD3	RPS19
NUMA1	SLC25A5	RBM14		RUVBL2		ULK1	PSMD4	RPS2
NUP153	SMAD3	RBM39		SH3KBP1		VAPA	PTPN5	RPS26
NXF1	SMAD7	RC3H1		SHC1		VCAM1	PXN	SART1
OBSL1	SNRPD2	RELA		SIRT7		VCP	RAB5C	SDHB
OPA1	SNRPN	RFC5		SLC25A3		WEE1	RANGAP1	SEC24D
OS9	SNW1	RNF2		SMAD4		XPO1	RARB	SF1
OXCT1	SOX2	RPA1		SMARCB1		XRCC5	RBBP4	SF3A2
PABPC4	SP1	RPL22		SMARCC1		XRCC6	RIPK1	SIN3A
PCM1	SRPK2	RPL37A		SMC1A		YBX1	RNF2	SKA1
PGM1	SRSF6	RPL4		SNRPB		YWHAE	RPA1	SKP1
PHB	SRSF7	RPLP0		SNW1		YWHAH	RPA2	SKP2
PHGDH	STAT1	RPRD1A		SRC		YWHAZ	RPL22	SMAD2
PIAS1	TBK1	RPS19		SRP68			RPL5	SMAD3
PIK3R1	TBL1XR1	RPS3		SRRM1			RPLP0	SMAD9
PLD1	TCF12	RPS5		SRSF5			RPS26	SMARCA5
PMS2	TCF3	RRP12		SVIL			SENP3	SMARCAD1
PON2	TERF2	RUVBL2		SYK			SH3GL2	SMARCC2
PPP2CA	TRA2B	SET		SYNCRIP			SH3KBP1	SMARCD1
PRKAR2B	TRAF6	SF3B1		SYT1			SIRT1	SNRNP70
PRKDC	TRAPPC3	SH3KBP1		TNFAIP3			SKI	SNRPA
PRPF8	TUBA1C	SHC1		TNFRSF1A			SKP1	SNRPB
PSMA6	TUBB	SIRT1		TOP2A			SKP2	SNRPD1
PSMB4	TUBG1	SIRT7		TP53			SMAD4	SNRPD3
PSMB6	TUBGCP2	SKP2		TRAF4			SMAD5	SNW1
PSMC3	UBB	SMAD1		TRAF6			SMARCC1	SP1
PSMD1	UBC	SMAD2		TUBB			SMARCC2	SRGAP2
PSMD9	UBE2I	SMAD3		U2AF2			SMARCD2	STAT5A
PTK2	UBE2L3	SMARCAD1		UBAP2L			SMARCE1	SUPT5H
PTPN5	USP14	SMARCB1		UBB			SMC4	SUZ12
RAD17	USP8	SMC1A		UBC			SNRNP70	SYNCRIP
RARA	VCP	SMC3		UBE2E2			SNRPA	TAF5
RBBP4	VDAC1	SNW1		UBL4A			SNRPB2	TAF6
RBMX	VDR	SP100		VCAM1			SNRPD3	TBK1
RELA	VIM	SPIN1		VCP			SQSTM1	TBXA2R
RELB	WDR5	SPTBN1		VDR			SRC	TIMM50
RHOA	XPO1	SRC		WDR77			SRGAP2	TRA2A
RIPK2	XRCC6	SRPK2		XAB2			STAT3	TRAF2
RNF2	YEATS2	SRRM2		XPO1			STAT5A	TRAF6
RNPS1	YWHAB	SUPT16H		XPO7			STAT6	TRIM28
RPA1	YWHAE	SUV39H1		XRCC5			SUPT16H	TUBA1A
RPA2	YWHAQ	SUZ12		YWHAE			SUPT5H	TUBA1C
RPA3	YWHAZ	TARDBP		ZC3H3			SYK	TUBB
RPL18		TBP		ZEB2			SYNCRIP	TUBGCP4
RPL23		TCERG1					TADA2A	U2AF2
RPL4		TECR					TBL1XR1	UBB
RPL6		TFRC					TBP	UBC
RPL9		TOP1					TCERG1	UBQLN1
RPP40		TOP2A					TCF4	USP7
RPS14		TOP2B					TFAP2C	VCP
RPS2		TPR					TFAP4	VHL
RPS20		TUBA1A					THOC2	WRN
RPS4X		TUBA4A					THRA	XAB2
RPS6KA3		TUBG1					TNKS1BP1	XPO1
RPS6KB2		U2AF2					TP63	XPO5
RRM1		UBB					TRAF2	XRCC5
RUVBL1		UBC					TRAF6	XRCC6
SCML2		UBE2I					TRIM27	YWHAB
SF1		UBE3A					TSC2	YWHAE
SF3B2		USP11					TSR1	YWHAQ
SFPQ		USP2					TTF2
SH3KBP1		VAV1					TUBB
SIN3A		VDR					TUBG1
SIRT1		WDR12					TYROBP
SKP1		XPO1					U2AF2
SMAD1		XRCC5					UBB
SMAD2		YWHAB					UBC
SMAD3		YWHAE					UBE2D1
SMAD4		YWHAZ					UBE2D3
SMARCB1		YY1					UBQLN1
SMG7							UCHL5
SNRPD3							VAV1
SNW1							VCP
SORBS3							WDR5
SP1							XIAP
SPRTN							XPC
SQSTM1							XPO1
SRC							XPOT
SREBF2							XRCC5
STX1A							XRCC6
SUZ12							YWHAG
SVIL							YWHAZ
SYK
SYNCRIP
SYNPO
TBP
TCF4
TCP1
TFAM
TIAL1
TICAM1
TMEM30A
TNFSF13B
TOPORS
TPM3
TPR
TRA2A
TRAF2
TRAPPC3
TRRAP
TUBG1
U2SURP
UBC
UBE2D3
UBE3A
UBQLN2
UCHL5
USP7
VAPA
WWOX
XPO1
XRCC5
XRCC6
YWHAG
YWHAZ
