# Supplementary material for: Exploring gene-patient association to identify personalized cancer driver genes by linear neighborhood propagation
Source: BMC Bioinformatics. 2024 Jan 22;25:34. doi: 10.1186/s12859-024-05662-4 (PMC10804660; doi:10.1186/s12859-024-05662-4)
Supplement: Supplementary file 5 — Additional file 5: The top 10 enriched pathways of the identified rare driver genes. [file 12859_2024_5662_MOESM5_ESM.xlsx]

## Sheet: BRCA_KEGG
	ID	Description	GeneRatio	BgRatio	pvalue	p.adjust	qvalue	geneID	Count	one_type	two_type
	hsa05200	Pathways in cancer	44/201	530/7914	1.0549e-12	8.59526e-11	3.86683e-11	ABL1/AKT1/APC/BCL2L1/CASP3/CASP8/CDK2/CTBP1/CTNNA1/CUL1/E2F1/EGFR/ERBB2/ESR1/FN1/FOXO1/GRB2/GSK3B/HDAC1/HDAC2/HSP90AA1/HSP90AB1/ITGB1/JUN/MAPK1/MAPK3/MTOR/MYC/NFKB2/PIK3R1/PLD1/PTK2/RARA/RELA/RHOA/RPS6KB2/SKP1/SMAD2/SMAD3/SMAD4/SP1/TPM3/TPR/TRAF2	44	Human Diseases	Cancer: overview
	hsa05205	Proteoglycans in cancer	27/201	204/7914	1.06995e-12	8.59526e-11	3.86683e-11	ACTB/ACTG1/AKT1/CASP3/CAV1/DCN/EGFR/ERBB2/ERBB3/ESR1/FLNA/FLNB/FN1/GRB2/IQGAP1/ITGB1/MAPK1/MAPK14/MAPK3/MTOR/MYC/PIK3R1/PTK2/RHOA/RPS6KB2/SMAD2/SRC	27	Human Diseases	Cancer: overview
	hsa04012	ErbB signaling pathway	17/201	85/7914	2.70989e-11	1.45078e-09	6.52676e-10	ABL1/AKT1/EGFR/ERBB2/ERBB3/GRB2/GSK3B/JUN/MAPK1/MAPK3/MTOR/MYC/NCK1/PIK3R1/PTK2/RPS6KB2/SRC	17	Environmental Information Processing	Signal transduction
	hsa05210	Colorectal cancer	17/201	86/7914	3.303e-11	1.45078e-09	6.52676e-10	AKT1/APC/CASP3/EGFR/GRB2/GSK3B/JUN/MAPK1/MAPK3/MTOR/MYC/PIK3R1/RHOA/RPS6KB2/SMAD2/SMAD3/SMAD4	17	Human Diseases	Cancer: specific types
	hsa05166	Human T-cell leukemia virus 1 infection	26/201	219/7914	3.61189e-11	1.45078e-09	6.52676e-10	AKT1/BCL2L1/CANX/CDK2/CREB1/E2F1/HLA-B/HLA-C/JUN/KAT2A/KAT2B/LTBR/MAP3K3/MAPK1/MAPK3/MYC/NFKB2/PIK3R1/RELA/RELB/SMAD2/SMAD3/SMAD4/TBP/TRRAP/XPO1	26	Human Diseases	Infectious disease: viral
	hsa04919	Thyroid hormone signaling pathway	19/201	119/7914	1.11116e-10	3.82557e-09	1.72105e-09	ACTB/ACTG1/AKT1/ESR1/FOXO1/GSK3B/HDAC1/HDAC2/HDAC3/KAT2A/KAT2B/MAPK1/MAPK3/MED14/MTOR/MYC/PIK3R1/SIN3A/SRC	19	Organismal Systems	Endocrine system
	hsa05135	Yersinia infection	19/201	120/7914	1.29111e-10	3.88948e-09	1.7498e-09	ACTB/ACTG1/AKT1/DOCK1/FN1/GSK3B/ITGB1/JUN/MAPK1/MAPK14/MAPK3/PIK3R1/PTK2/RELA/RHOA/RPS6KA3/SRC/TICAM1/TRAF2	19	Human Diseases	Infectious disease: bacterial
	hsa05169	Epstein-Barr virus infection	24/201	201/7914	1.93349e-10	5.17746e-09	2.32923e-09	AKT1/CASP3/CASP8/CDK2/E2F1/HDAC1/HDAC2/HLA-B/HLA-C/JUN/LYN/MAPK14/MYC/NFKB2/PIK3R1/PSMC3/PSMD1/RELA/RELB/SIN3A/SNW1/SYK/TRAF2/USP7	24	Human Diseases	Infectious disease: viral
	hsa05215	Prostate cancer	17/201	97/7914	2.45292e-10	5.91153e-09	2.65948e-09	AKT1/CDK2/CREB1/E2F1/EGFR/ERBB2/ERG/FOXO1/GRB2/GSK3B/HSP90AA1/HSP90AB1/MAPK1/MAPK3/MTOR/PIK3R1/RELA	17	Human Diseases	Cancer: specific types
	hsa05212	Pancreatic cancer	15/201	75/7914	4.17874e-10	9.15525e-09	4.11876e-09	AKT1/BCL2L1/E2F1/EGFR/ERBB2/MAPK1/MAPK3/MTOR/PIK3R1/PLD1/RELA/RPS6KB2/SMAD2/SMAD3/SMAD4	15	Human Diseases	Cancer: specific types

## Sheet: COAD_KEGG
ID	Description	GeneRatio	BgRatio	pvalue	p.adjust	qvalue	geneID	Count	one_type	two_type
hsa05169	Epstein-Barr virus infection	24/147	201/7914	1.99752e-13	4.55434e-11	2.16573e-11	AKT1/BCL2/CDK2/CDK4/CDKN1A/CHUK/HDAC1/HDAC2/LYN/MAPK8/MDM2/NFKB1/NFKB2/NFKBIB/PSMC5/PSMD3/PSMD6/RELA/SKP2/SNW1/STAT1/TBK1/TRAF6/VIM	24	Human Diseases	Infectious disease: viral
hsa05203	Viral carcinogenesis	23/147	201/7914	1.66042e-12	1.89288e-10	9.00121e-11	ATP6V0D1/CDK2/CDK4/CDKN1A/DDB1/GRB2/HDAC1/HDAC2/HDAC5/HDAC7/HNRNPK/LYN/MDM2/NFKB1/NFKB2/PRKACA/RELA/SKP2/SNW1/YWHAB/YWHAE/YWHAQ/YWHAZ	23	Human Diseases	Cancer: overview
hsa05161	Hepatitis B	20/147	162/7914	1.30651e-11	9.92951e-10	4.72179e-10	AKT1/BCL2/CDK2/CDKN1A/CHUK/DDB1/GRB2/MAPK8/NFATC1/NFKB1/PCNA/PRKCA/RELA/SMAD3/STAT1/TBK1/TRAF6/YWHAB/YWHAQ/YWHAZ	20	Human Diseases	Infectious disease: viral
hsa04110	Cell cycle	16/147	124/7914	8.63757e-10	4.68937e-08	2.22994e-08	CDK2/CDK4/CDK7/CDKN1A/HDAC1/HDAC2/MCM2/MDM2/ORC2/PCNA/SKP2/SMAD3/YWHAB/YWHAE/YWHAQ/YWHAZ	16	Cellular Processes	Cell growth and death
hsa05220	Chronic myeloid leukemia	13/147	76/7914	1.02837e-09	4.68937e-08	2.22994e-08	AKT1/CDK4/CDKN1A/CHUK/CRK/CRKL/GRB2/HDAC1/HDAC2/MDM2/NFKB1/RELA/SMAD3	13	Human Diseases	Cancer: specific types
hsa05166	Human T-cell leukemia virus 1 infection	18/147	219/7914	1.03807e-07	3.94465e-06	1.8758e-06	AKT1/CDK2/CDK4/CDKN1A/CHUK/KAT5/MAP3K3/MAPK8/NFATC1/NFKB1/NFKB2/PRKACA/RELA/SLC25A5/SMAD3/TCF3/VDAC1/XPO1	18	Human Diseases	Infectious disease: viral
hsa05160	Hepatitis C	15/147	155/7914	1.5481e-07	4.88031e-06	2.32074e-06	AKT1/CDK2/CDK4/CDKN1A/CHUK/GRB2/NFKB1/RELA/STAT1/TBK1/TRAF6/YWHAB/YWHAE/YWHAQ/YWHAZ	15	Human Diseases	Infectious disease: viral
hsa04120	Ubiquitin mediated proteolysis	14/147	136/7914	1.90367e-07	4.88031e-06	2.32074e-06	BRCA1/BTRC/CUL3/CUL5/CUL7/DDB1/ITCH/MDM2/PML/PRPF19/SKP2/TRAF6/UBE2I/UBE2L3	14	Genetic Information Processing	Folding, sorting and degradation
hsa05215	Prostate cancer	12/147	97/7914	1.97799e-07	4.88031e-06	2.32074e-06	AKT1/BCL2/CDK2/CDKN1A/CHUK/FOXO1/GRB2/HSP90AA1/HSP90AB1/MDM2/NFKB1/RELA	12	Human Diseases	Cancer: specific types
hsa05162	Measles	14/147	138/7914	2.28583e-07	4.88031e-06	2.32074e-06	AKT1/BCL2/CDK2/CDK4/CHUK/CSNK2A1/CSNK2A2/MAPK8/NFKB1/NFKBIB/RELA/STAT1/TBK1/TRAF6	14	Human Diseases	Infectious disease: viral

## Sheet: HNSC_KEGG
ID	Description	GeneRatio	BgRatio	pvalue	p.adjust	qvalue	geneID	Count	one_type	two_type
hsa04110	Cell cycle	21/169	124/7914	1.07254e-13	2.38104e-11	1.17415e-11	ATM/BUB1B/CCNB1/CCNE1/CDC6/CHEK1/CUL1/GSK3B/MCM2/MCM5/MYC/RAD21/RBL2/SKP2/SMAD2/SMAD3/SMC1A/SMC3/YWHAB/YWHAE/YWHAZ	21	Cellular Processes	Cell growth and death
hsa05203	Viral carcinogenesis	22/169	201/7914	2.16023e-10	2.39785e-08	1.18244e-08	ACTN1/CCNE1/CDC42/CHEK1/GTF2B/HDAC6/HNRNPK/MAPK1/PIK3R1/PRKACA/PXN/RBL2/RELA/SKP2/SNW1/SP100/SRC/TBP/UBE3A/YWHAB/YWHAE/YWHAZ	22	Human Diseases	Cancer: overview
hsa05205	Proteoglycans in cancer	21/169	204/7914	1.791e-09	1.32534e-07	6.5356e-08	ACTB/CDC42/CTNNB1/EIF4B/ELK1/ESR1/FLNB/FN1/IGF1R/IQGAP1/MAPK1/MET/MSN/MYC/PIK3R1/PRKACA/PRKCB/PXN/SMAD2/SRC/VAV1	21	Human Diseases	Cancer: overview
hsa04520	Adherens junction	13/169	71/7914	2.39861e-09	1.33123e-07	6.56461e-08	ACTB/ACTN1/CDC42/CSNK2A1/CSNK2A2/CTNNB1/IGF1R/IQGAP1/MAPK1/MET/NLK/SMAD3/SRC	13	Cellular Processes	Cellular community - eukaryotes
hsa05200	Pathways in cancer	34/169	530/7914	4.53868e-09	2.01517e-07	9.93731e-08	ARNT/CCNE1/CDC42/CKS1B/CTBP1/CTNNB1/CUL1/CUL2/ELK1/EPAS1/ESR1/FN1/GNAI3/GSK3B/HSP90AA1/HSP90AB1/IGF1R/MAPK1/MAPK8/MAX/MET/MSH6/MYC/NCOA1/NCOA3/PIK3R1/PRKACA/PRKCB/RARA/RELA/SKP2/SMAD2/SMAD3/TPR	34	Human Diseases	Cancer: overview
hsa04915	Estrogen signaling pathway	16/169	138/7914	3.2146e-08	1.1894e-06	5.86524e-07	ESR1/GNAI3/HSP90AA1/HSP90AB1/HSPA8/KRT18/MAPK1/NCOA1/NCOA2/NCOA3/PIK3R1/PRKACA/PRKCD/RARA/SHC1/SRC	16	Organismal Systems	Endocrine system
hsa04510	Focal adhesion	18/169	199/7914	2.06654e-07	6.5539e-06	3.23189e-06	ACTB/ACTN1/CDC42/CTNNB1/ELK1/FLNB/FN1/GSK3B/IGF1R/MAPK1/MAPK8/MET/PIK3R1/PRKCB/PXN/SHC1/SRC/VAV1	18	Cellular Processes	Cellular community - eukaryotes
hsa04933	AGE-RAGE signaling pathway in diabetic complications	12/169	100/7914	1.25302e-06	3.23895e-05	1.59721e-05	CDC42/FN1/MAPK1/MAPK8/NFATC1/PIK3R1/PRKCB/PRKCD/PRKCZ/RELA/SMAD2/SMAD3	12	Human Diseases	Endocrine and metabolic disease
hsa04919	Thyroid hormone signaling pathway	13/169	119/7914	1.32525e-06	3.23895e-05	1.59721e-05	ACTB/CTNNB1/ESR1/GSK3B/MAPK1/MYC/NCOA1/NCOA2/NCOA3/PIK3R1/PRKACA/PRKCB/SRC	13	Organismal Systems	Endocrine system
hsa05135	Yersinia infection	13/169	120/7914	1.45899e-06	3.23895e-05	1.59721e-05	ACTB/CDC42/FN1/GSK3B/LIMK1/MAPK1/MAPK8/NFATC1/PIK3R1/PXN/RELA/SRC/VAV1	13	Human Diseases	Infectious disease: bacterial

## Sheet: KICH_KEGG
ID	Description	GeneRatio	BgRatio	pvalue	p.adjust	qvalue	geneID	Count	one_type	two_type
hsa04919	Thyroid hormone signaling pathway	45076	119/7914	7.45349e-05	0.00468114	0.00323705	CREBBP/CTNNB1/MED16/SIN3A/SRC	5	Organismal Systems	Endocrine system
hsa04110	Cell cycle	45076	124/7914	9.06766e-05	0.00468114	0.00323705	CDKN1A/CREBBP/MCM2/PRKDC/SMAD3	5	Cellular Processes	Cell growth and death
hsa04068	FoxO signaling pathway	45076	131/7914	0.000117656	0.00468114	0.00323705	CDKN1A/CREBBP/IRS1/SIRT1/SMAD3	5	Environmental Information Processing	Signal transduction
hsa04520	Adherens junction	45046	71/7914	0.000136676	0.00468114	0.00323705	CREBBP/CTNNB1/SMAD3/SRC	4	Cellular Processes	Cellular community - eukaryotes
hsa05161	Hepatitis B	45076	162/7914	0.000318168	0.00859546	0.00594385	CDKN1A/CREBBP/IKBKE/SMAD3/SRC	5	Human Diseases	Infectious disease: viral
hsa05225	Hepatocellular carcinoma	45076	168/7914	0.000376444	0.00859546	0.00594385	CDKN1A/CTNNB1/SMAD3/SMARCA4/SMARCB1	5	Human Diseases	Cancer: specific types
hsa05215	Prostate cancer	45046	97/7914	0.000455155	0.00890804	0.00616	CDKN1A/CREBBP/CTNNB1/HSP90AA1	4	Human Diseases	Cancer: specific types
hsa05167	Kaposi sarcoma-associated herpesvirus infection	45076	186/7914	0.000600547	0.0102844	0.00711174	CDKN1A/CREBBP/CTNNB1/IKBKE/SRC	5	Human Diseases	Infectious disease: viral
hsa04213	Longevity regulating pathway - multiple species	45015	62/7914	0.00159898	0.02434	0.0168313	HSPA8/IRS1/SIRT1	3	Organismal Systems	Aging
hsa04144	Endocytosis	45076	243/7914	0.0019903	0.0272671	0.0188555	ARAP1/HSPA8/SH3KBP1/SMAD3/SRC	5	Cellular Processes	Transport and catabolism

## Sheet: KIRC_KEGG
ID	Description	GeneRatio	BgRatio	pvalue	p.adjust	qvalue	geneID	Count	one_type	two_type
hsa05203	Viral carcinogenesis	24/141	201/7914	7.66347e-14	1.7626e-11	8.95416e-12	ACTN4/ATF4/CCNA1/CDK2/CDKN1A/DDB1/GRB2/GSN/HDAC1/HDAC7/IKBKG/LTBR/MAPK3/NFKB1/PRKACA/PXN/RAC1/RBPJ/RELA/SNW1/SRC/SYK/TP53/YWHAE	24	Human Diseases	Cancer: overview
hsa04722	Neurotrophin signaling pathway	15/141	119/7914	2.33034e-09	2.67989e-07	1.36141e-07	ABL1/ATF4/GRB2/MAP3K3/MAPK3/NFKB1/NFKBIB/PSEN2/PTPN11/RAC1/RELA/SHC1/TP53/TRAF6/YWHAE	15	Organismal Systems	Nervous system
hsa05220	Chronic myeloid leukemia	12/141	76/7914	7.47815e-09	5.05648e-07	2.56874e-07	ABL1/CDKN1A/GRB2/HDAC1/IKBKG/MAPK3/NFKB1/PTPN11/RELA/SHC1/SMAD4/TP53	12	Human Diseases	Cancer: specific types
hsa05166	Human T-cell leukemia virus 1 infection	19/141	219/7914	9.18547e-09	5.05648e-07	2.56874e-07	ANAPC7/ATF4/ATM/CCNA1/CDK2/CDKN1A/IKBKG/KAT5/LTBR/MAP3K3/MAPK3/NFKB1/PRKACA/RAN/RELA/SMAD4/TNFRSF1A/TP53/XPO1	19	Human Diseases	Infectious disease: viral
hsa05215	Prostate cancer	13/141	97/7914	1.35523e-08	5.05648e-07	2.56874e-07	AR/ATF4/CDK2/CDKN1A/EGFR/ERBB2/GRB2/HSP90AB1/IKBKG/MAPK3/NFKB1/RELA/TP53	13	Human Diseases	Cancer: specific types
hsa05169	Epstein-Barr virus infection	18/141	201/7914	1.41913e-08	5.05648e-07	2.56874e-07	CCNA1/CDK2/CDKN1A/HDAC1/IKBKG/NCOR2/NFKB1/NFKBIB/PSMD6/RAC1/RBPJ/RELA/RUNX3/SNW1/SYK/TNFAIP3/TP53/TRAF6	18	Human Diseases	Infectious disease: viral
hsa01522	Endocrine resistance	13/141	98/7914	1.53893e-08	5.05648e-07	2.56874e-07	CDKN1A/EGFR/ERBB2/ESR1/ESR2/GRB2/MAPK3/NCOR1/NOTCH1/PRKACA/SHC1/SRC/TP53	13	Human Diseases	Drug resistance: antineoplastic
hsa05131	Shigellosis	11/141	67/7914	2.12648e-08	6.11363e-07	3.10578e-07	ABL1/ACTG1/FBXW11/IKBKG/ITGB1/MAPK3/NFKB1/NFKBIB/RAC1/RELA/SRC	11	Human Diseases	Infectious disease: bacterial
hsa04110	Cell cycle	13/141	124/7914	2.64609e-07	6.76222e-06	3.43527e-06	ABL1/ANAPC7/ATM/CCNA1/CDK2/CDKN1A/HDAC1/MCM7/ORC2/SMAD4/SMC1A/TP53/YWHAE	13	Cellular Processes	Cell growth and death
hsa05165	Human papillomavirus infection	21/141	330/7914	3.22208e-07	7.41078e-06	3.76475e-06	APC/ATM/CCNA1/CDK2/CDKN1A/CSNK1A1/EGFR/GRB2/HDAC1/IKBKG/ITGB1/MAPK3/NFKB1/NOTCH1/PPP2R1A/PRKACA/PXN/RBPJ/RELA/TNFRSF1A/TP53	21	Human Diseases	Infectious disease: viral

## Sheet: KIRP_KEGG
ID	Description	GeneRatio	BgRatio	pvalue	p.adjust	qvalue	geneID	Count	one_type	two_type
hsa05200	Pathways in cancer	20/69	530/7914	1.21212e-08	1.3684e-06	7.45543e-07	ABL1/CASP3/CUL1/EPAS1/ERBB2/ESR1/GSK3B/IL6ST/JAK1/NFKB2/NOTCH1/NTRK1/PML/PRKACA/RELA/SMAD3/SMAD4/STAT5A/TP53/VHL	20	Human Diseases	Cancer: overview
hsa05203	Viral carcinogenesis	13/69	201/7914	1.37527e-08	1.3684e-06	7.45543e-07	CASP3/HDAC5/HDAC6/HIST2H2BE/HLA-B/IL6ST/JAK1/LYN/NFKB2/PRKACA/RELA/STAT5A/TP53	13	Human Diseases	Cancer: overview
hsa05169	Epstein-Barr virus infection	11/69	201/7914	1.08479e-06	7.19579e-05	3.92048e-05	CASP3/HLA-B/JAK1/LYN/MAP3K7/MAPK14/NEDD4/NFKB2/RELA/TNFAIP3/TP53	11	Human Diseases	Infectious disease: viral
hsa05166	Human T-cell leukemia virus 1 infection	11/69	219/7914	2.52197e-06	0.00010662	5.80898e-05	ATM/HLA-B/JAK1/NFKB2/PRKACA/RELA/SMAD3/SMAD4/STAT5A/TP53/XPO1	11	Human Diseases	Infectious disease: viral
hsa05162	Measles	9/69	138/7914	2.6789e-06	0.00010662	5.80898e-05	CASP3/EIF2S1/GSK3B/JAK1/MAP3K7/RELA/STAT5A/TNFAIP3/TP53	9	Human Diseases	Infectious disease: viral
hsa05220	Chronic myeloid leukemia	7/69	76/7914	3.81224e-06	0.000126439	6.88878e-05	ABL1/GAB2/RELA/SMAD3/SMAD4/STAT5A/TP53	7	Human Diseases	Cancer: specific types
hsa05161	Hepatitis B	9/69	162/7914	1.00068e-05	0.000270726	0.000147499	CASP3/JAK1/MAP3K7/MAPK14/RELA/SMAD3/SMAD4/STAT5A/TP53	9	Human Diseases	Infectious disease: viral
hsa04110	Cell cycle	8/69	124/7914	1.08834e-05	0.000270726	0.000147499	ABL1/ATM/CUL1/GSK3B/PLK1/SMAD3/SMAD4/TP53	8	Cellular Processes	Cell growth and death
hsa04210	Apoptosis	8/69	136/7914	2.14168e-05	0.00047355	0.000258004	ACTB/ATM/CASP3/EIF2S1/NTRK1/RELA/TP53/TUBA1B	8	Cellular Processes	Cell growth and death
hsa05167	Kaposi sarcoma-associated herpesvirus infection	9/69	186/7914	3.02878e-05	0.000602727	0.000328383	CASP3/GSK3B/HLA-B/IL6ST/JAK1/LYN/MAPK14/RELA/TP53	9	Human Diseases	Infectious disease: viral

## Sheet: LIHC_KEGG
ID	Description	GeneRatio	BgRatio	pvalue	p.adjust	qvalue	geneID	Count	one_type	two_type
hsa05203	Viral carcinogenesis	25/128	201/7914	7.68332e-16	1.63655e-13	6.87455e-14	CCNA2/CDK2/CDKN1A/CREBBP/HDAC1/HDAC3/JUN/KAT2A/KAT2B/KRAS/LYN/MAPK1/MAPKAPK2/MDM2/RBPJ/RELA/SKP2/SNW1/SRC/STAT3/TBP/UBE3A/YWHAE/YWHAH/YWHAZ	25	Human Diseases	Cancer: overview
hsa04110	Cell cycle	20/128	124/7914	4.90208e-15	5.22071e-13	2.19303e-13	ABL1/CCNA2/CCNB1/CDK2/CDKN1A/CREBBP/CUL1/E2F1/HDAC1/MCM2/MCM7/MDM2/PCNA/SKP1/SKP2/SMAD3/WEE1/YWHAE/YWHAH/YWHAZ	20	Cellular Processes	Cell growth and death
hsa05161	Hepatitis B	22/128	162/7914	7.82144e-15	5.55322e-13	2.33271e-13	CCNA2/CDK2/CDKN1A/CHUK/CREBBP/E2F1/IKBKB/JUN/KRAS/MAP2K1/MAP3K1/MAP3K7/MAPK1/MAPK14/MAPK9/PCNA/RELA/SMAD3/SRC/STAT3/TRAF6/YWHAZ	22	Human Diseases	Infectious disease: viral
hsa05166	Human T-cell leukemia virus 1 infection	24/128	219/7914	5.59563e-14	2.97967e-12	1.25165e-12	CANX/CCNA2/CDK2/CDKN1A/CHUK/CREBBP/E2F1/IKBKB/JUN/KAT2A/KAT2B/KRAS/LCK/MAP2K1/MAP3K1/MAPK1/MAPK9/NRP1/RELA/SMAD3/TBP/TCF3/TRRAP/XPO1	24	Human Diseases	Infectious disease: viral
hsa04722	Neurotrophin signaling pathway	17/128	119/7914	4.92695e-12	2.09888e-10	8.81665e-11	ABL1/IKBKB/JUN/KRAS/MAP2K1/MAP3K1/MAPK1/MAPK14/MAPK7/MAPK9/MAPKAPK2/NTRK1/RELA/RIPK2/SHC1/TRAF6/YWHAE	17	Organismal Systems	Nervous system
hsa05200	Pathways in cancer	33/128	530/7914	7.26538e-12	2.57921e-10	1.08343e-10	ABL1/CCNA2/CDK2/CDKN1A/CHUK/CREBBP/CTBP1/CUL1/E2F1/EGFR/HDAC1/HSP90AA1/HSP90AB1/IKBKB/JUN/KRAS/MAP2K1/MAPK1/MAPK9/MDM2/NCOA1/NCOA3/NOS2/NOTCH1/NTRK1/PLD1/RELA/SKP1/SKP2/SMAD3/STAT3/TPR/TRAF6	33	Human Diseases	Cancer: overview
hsa05220	Chronic myeloid leukemia	14/128	76/7914	1.20103e-11	3.65455e-10	1.53515e-10	ABL1/CDKN1A/CHUK/CTBP1/E2F1/HDAC1/IKBKB/KRAS/MAP2K1/MAPK1/MDM2/RELA/SHC1/SMAD3	14	Human Diseases	Cancer: specific types
hsa04068	FoxO signaling pathway	17/128	131/7914	2.40769e-11	6.41047e-10	2.69281e-10	CCNB1/CDK2/CDKN1A/CHUK/CREBBP/EGFR/IKBKB/KRAS/MAP2K1/MAPK1/MAPK14/MAPK9/MDM2/SKP2/SMAD3/STAT3/STK11	17	Environmental Information Processing	Signal transduction
hsa05169	Epstein-Barr virus infection	20/128	201/7914	5.25526e-11	1.24375e-09	5.22453e-10	CCNA2/CDK2/CDKN1A/CHUK/E2F1/HDAC1/IKBKB/JUN/LYN/MAP3K7/MAPK14/MAPK9/MDM2/NEDD4/RBPJ/RELA/SKP2/SNW1/STAT3/TRAF6	20	Human Diseases	Infectious disease: viral
hsa05235	PD-L1 expression and PD-1 checkpoint pathway in cancer	14/128	89/7914	1.11755e-10	2.38037e-09	9.9991e-10	CHUK/CSNK2A1/EGFR/IKBKB/JUN/KRAS/LCK/MAP2K1/MAPK1/MAPK14/PRKCQ/RELA/STAT3/TRAF6	14	Human Diseases	Cancer: overview

## Sheet: LUAD_KEGG
ID	Description	GeneRatio	BgRatio	pvalue	p.adjust	qvalue	geneID	Count	one_type	two_type
hsa05203	Viral carcinogenesis	27/176	201/7914	2.70581e-14	6.30453e-12	2.62036e-12	CASP3/CDK1/CDKN2A/CREB1/DDX3X/GRB2/HDAC11/HDAC2/HDAC5/HDAC6/HIST2H2BE/JAK1/LYN/MAPK1/MAPK3/NFKB1/PIK3R1/PXN/SKP2/SRC/STAT3/STAT5A/SYK/TBP/TRAF2/YWHAG/YWHAZ	27	Human Diseases	Cancer: overview
hsa05200	Pathways in cancer	40/176	530/7914	3.34237e-12	3.89386e-10	1.61841e-10	ABL1/AKT1/APC/AR/BCL2/BCL2L11/CASP3/CDKN2A/CTBP1/CTNNA1/CUL1/CUL2/EGLN2/ESR2/FOXO1/GRB2/HDAC2/HSP90AA1/IGF1R/IKBKB/ITGB1/JAK1/JUP/MAPK1/MAPK3/MYC/NFKB1/NOTCH1/NTRK1/PIK3R1/RARB/SKP1/SKP2/SMAD4/STAT3/STAT5A/STAT6/TRAF2/TRAF6/XIAP	40	Human Diseases	Cancer: overview
hsa05161	Hepatitis B	22/176	162/7914	6.48914e-12	5.0399e-10	2.09474e-10	AKT1/BCL2/CASP3/CREB1/DDX3X/GRB2/IKBKB/JAK1/MAPK1/MAPK14/MAPK3/MYC/NFATC1/NFKB1/PIK3R1/SMAD4/SRC/STAT3/STAT5A/STAT6/TRAF6/YWHAZ	22	Human Diseases	Infectious disease: viral
hsa04380	Osteoclast differentiation	18/176	128/7914	3.3669e-10	1.96122e-08	8.15144e-09	AKT1/CREB1/FYN/GRB2/IKBKB/JAK1/LCK/MAPK1/MAPK14/MAPK3/NFATC1/NFKB1/PIK3R1/SQSTM1/SYK/TRAF2/TRAF6/TYROBP	18	Organismal Systems	Development and regeneration
hsa05169	Epstein-Barr virus infection	22/176	201/7914	4.79325e-10	2.23365e-08	9.28376e-09	AKT1/BCL2/BCL2L11/CASP3/HDAC2/HLA-DPA1/IKBKB/JAK1/LYN/MAPK14/MYC/NFKB1/PIK3R1/PSMC4/PSMD3/PSMD4/RIPK1/SKP2/STAT3/SYK/TRAF2/TRAF6	22	Human Diseases	Infectious disease: viral
hsa05235	PD-L1 expression and PD-1 checkpoint pathway in cancer	15/176	89/7914	8.0672e-10	2.9697e-08	1.2343e-08	AKT1/CSNK2A1/CSNK2B/IKBKB/JAK1/LCK/MAP3K3/MAPK1/MAPK14/MAPK3/NFATC1/NFKB1/PIK3R1/STAT3/TRAF6	15	Human Diseases	Cancer: overview
hsa05220	Chronic myeloid leukemia	14/176	76/7914	8.92184e-10	2.9697e-08	1.2343e-08	ABL1/AKT1/CDKN2A/CTBP1/GRB2/HDAC2/IKBKB/MAPK1/MAPK3/MYC/NFKB1/PIK3R1/SMAD4/STAT5A	14	Human Diseases	Cancer: specific types
hsa05135	Yersinia infection	16/176	120/7914	7.50992e-09	2.18726e-07	9.09095e-08	ACTB/AKT1/IKBKB/ITGB1/LCK/MAPK1/MAPK14/MAPK3/NFATC1/NFKB1/PIK3R1/PXN/SRC/TRAF2/TRAF6/VAV1	16	Human Diseases	Infectious disease: bacterial
hsa04659	Th17 cell differentiation	15/176	107/7914	1.12521e-08	2.91304e-07	1.21075e-07	AHR/HLA-DPA1/HSP90AA1/IKBKB/JAK1/LCK/MAPK1/MAPK14/MAPK3/NFATC1/NFKB1/SMAD4/STAT3/STAT5A/STAT6	15	Organismal Systems	Immune system
hsa05166	Human T-cell leukemia virus 1 infection	21/176	219/7914	1.35727e-08	3.16245e-07	1.31441e-07	AKT1/ANAPC1/CDC27/CDKN2A/CREB1/HLA-DPA1/IKBKB/JAK1/LCK/MAP3K3/MAPK1/MAPK3/MYC/NFATC1/NFKB1/PIK3R1/SMAD4/STAT5A/TBP/XIAP/XPO1	21	Human Diseases	Infectious disease: viral

## Sheet: LUSC_KEGG
ID	Description	GeneRatio	BgRatio	pvalue	p.adjust	qvalue	geneID	Count	one_type	two_type
hsa03040	Spliceosome	22/162	135/7914	2.48421e-14	5.36589e-12	3.03335e-12	CDC5L/DHX15/EFTUD2/HNRNPA1/HNRNPU/HSPA1L/PLRG1/PRPF19/PRPF4/PRPF8/RBM8A/SART1/SF3A2/SNRNP70/SNRPA/SNRPB/SNRPD1/SNRPD3/SNW1/TRA2A/U2AF2/XAB2	22	Genetic Information Processing	Transcription
hsa04110	Cell cycle	19/162	124/7914	5.10423e-12	5.51257e-10	3.11627e-10	ABL1/ATM/BUB3/CCNA2/CDC20/CUL1/GSK3B/HDAC1/MCM2/MCM3/MCM5/MYC/SKP1/SKP2/SMAD2/SMAD3/YWHAB/YWHAE/YWHAQ	19	Cellular Processes	Cell growth and death
hsa05169	Epstein-Barr virus infection	23/162	201/7914	1.32952e-11	9.57254e-10	5.41138e-10	CASP8/CCNA2/HDAC1/HLA-B/IKBKB/IKBKE/LYN/MAPK9/MYC/PSMC2/PSMC4/PSMC6/PSMD11/PSMD3/PSMD6/RELA/SIN3A/SKP2/SNW1/TBK1/TRAF2/TRAF6/USP7	23	Human Diseases	Infectious disease: viral
hsa05203	Viral carcinogenesis	22/162	201/7914	9.32382e-11	5.03486e-09	2.84622e-09	CASP8/CCNA2/CDC20/HDAC1/HDAC3/HIST2H2BE/HLA-B/KAT2B/LTBR/LYN/MAPK3/PXN/REL/RELA/SKP2/SNW1/STAT5A/TRAF2/USP7/YWHAB/YWHAE/YWHAQ	22	Human Diseases	Cancer: overview
hsa04657	IL-17 signaling pathway	13/162	93/7914	4.30599e-08	1.86019e-06	1.05157e-06	CASP8/CEBPB/GSK3B/HSP90AA1/HSP90AB1/IKBKB/IKBKE/MAPK3/MAPK9/RELA/TBK1/TRAF2/TRAF6	13	Organismal Systems	Immune system
hsa05166	Human T-cell leukemia virus 1 infection	19/162	219/7914	9.11134e-08	3.28008e-06	1.85424e-06	ATM/BUB3/CCNA2/CD4/CDC20/HLA-B/IKBKB/KAT2B/LCK/LTBR/MAPK3/MAPK9/MYC/NFATC1/RELA/SMAD2/SMAD3/STAT5A/XPO1	19	Human Diseases	Infectious disease: viral
hsa05130	Pathogenic Escherichia coli infection	18/162	201/7914	1.25853e-07	3.88347e-06	2.19533e-06	ABL1/ACTB/CASP8/FYN/IKBKB/LYN/MAPK3/MAPK9/MYO1C/NCL/PTPN11/RELA/SEC24D/TRAF2/TRAF6/TUBA1A/TUBA1C/TUBB	18	Human Diseases	Infectious disease: bacterial
hsa05161	Hepatitis B	16/162	162/7914	1.71429e-07	4.6286e-06	2.61656e-06	CASP8/CCNA2/IKBKB/IKBKE/MAPK3/MAPK9/MYC/NFATC1/PRKCA/RELA/SMAD3/STAT5A/TBK1/TRAF6/YWHAB/YWHAQ	16	Human Diseases	Infectious disease: viral
hsa05200	Pathways in cancer	30/162	530/7914	2.59438e-07	6.22651e-06	3.51986e-06	ABL1/CASP8/CCNA2/CTBP1/CUL1/CUL2/EGFR/ERBB2/GSK3B/HDAC1/HSP90AA1/HSP90AB1/IKBKB/MAPK3/MAPK9/MLH1/MYC/NCOA3/PML/PRKCA/RELA/SKP1/SKP2/SMAD2/SMAD3/SP1/STAT5A/TRAF2/TRAF6/VHL	30	Human Diseases	Cancer: overview
hsa05160	Hepatitis C	15/162	155/7914	5.54154e-07	1.19697e-05	6.76652e-06	CASP8/EGFR/EIF2S1/GSK3B/IKBKB/IKBKE/MAPK3/MYC/RELA/TBK1/TRAF2/TRAF6/YWHAB/YWHAE/YWHAQ	15	Human Diseases	Infectious disease: viral

## Sheet: PRAD_KEGG
ID	Description	GeneRatio	BgRatio	pvalue	p.adjust	qvalue	geneID	Count	one_type	two_type
hsa05203	Viral carcinogenesis	20/105	201/7914	1.15516e-12	2.37962e-10	9.36285e-11	ATF2/CDC20/CDKN1B/CREBBP/EP300/GRB2/GTF2B/HDAC3/HDAC6/IRF9/JUN/LTBR/NFKB1/RAC1/RELA/SNW1/STAT5A/SYK/TRAF2/YWHAH	20	Human Diseases	Cancer: overview
hsa04012	ErbB signaling pathway	11/105	85/7914	1.2433e-08	9.96625e-07	3.92131e-07	ABL1/AKT1/BRAF/CAMK2D/CDKN1B/EGFR/GRB2/JUN/PRKCA/SHC1/STAT5A	11	Environmental Information Processing	Signal transduction
hsa05200	Pathways in cancer	25/105	530/7914	1.56426e-08	9.96625e-07	3.92131e-07	ABL1/AKT1/APC/BRAF/CAMK2D/CDH1/CDKN1B/CREBBP/EGFR/EP300/GRB2/HSP90AA1/HSP90AB1/JUN/MSH6/NFKB1/PML/PRKCA/RAC1/RELA/SMAD2/SMAD4/SP1/STAT5A/TRAF2	25	Human Diseases	Cancer: overview
hsa05161	Hepatitis B	14/105	162/7914	2.36611e-08	9.96625e-07	3.92131e-07	AKT1/ATF2/BRAF/CREBBP/EP300/GRB2/JUN/MAP3K7/NFATC2/NFKB1/PRKCA/RELA/SMAD4/STAT5A	14	Human Diseases	Infectious disease: viral
hsa05166	Human T-cell leukemia virus 1 infection	16/105	219/7914	2.41899e-08	9.96625e-07	3.92131e-07	AKT1/ATF2/CDC20/CDC27/CREBBP/EGR1/EP300/JUN/KAT5/LTBR/NFATC2/NFKB1/RELA/SMAD2/SMAD4/STAT5A	16	Human Diseases	Infectious disease: viral
hsa05220	Chronic myeloid leukemia	10/105	76/7914	5.04733e-08	1.49502e-06	5.88228e-07	ABL1/AKT1/BRAF/CDKN1B/GRB2/NFKB1/RELA/SHC1/SMAD4/STAT5A	10	Human Diseases	Cancer: specific types
hsa05215	Prostate cancer	11/105	97/7914	5.08015e-08	1.49502e-06	5.88228e-07	AKT1/BRAF/CDKN1B/CREBBP/EGFR/EP300/GRB2/HSP90AA1/HSP90AB1/NFKB1/RELA	11	Human Diseases	Cancer: specific types
hsa04933	AGE-RAGE signaling pathway in diabetic complications	11/105	100/7914	6.99875e-08	1.6694e-06	6.56842e-07	AKT1/CDKN1B/EGR1/JUN/NFKB1/PRKCA/RAC1/RELA/SMAD2/SMAD4/STAT5A	11	Human Diseases	Endocrine and metabolic disease
hsa04110	Cell cycle	12/105	124/7914	7.29351e-08	1.6694e-06	6.56842e-07	ABL1/CCNB1/CDC20/CDC27/CDKN1B/CREBBP/EP300/MCM2/MCM3/SMAD2/SMAD4/YWHAH	12	Cellular Processes	Cell growth and death
hsa04310	Wnt signaling pathway	13/105	160/7914	1.61883e-07	3.14114e-06	1.23591e-06	APC/CAMK2D/CREBBP/CSNK2A1/CSNK2A2/EP300/FBXW11/JUN/MAP3K7/NFATC2/PRKCA/RAC1/SMAD4	13	Environmental Information Processing	Signal transduction

[truncated: 2 more sheets: THCA_KEGG, UCEC_KEGG]
