# Supplementary material for: Exploring gene-patient association to identify personalized cancer driver genes by linear neighborhood propagation
Source: BMC Bioinformatics. 2024 Jan 22;25:34. doi: 10.1186/s12859-024-05662-4 (PMC10804660; doi:10.1186/s12859-024-05662-4)
Supplement: Supplementary file 6 — Additional file 6: The 42 potentially novel driver genes. [file 12859_2024_5662_MOESM6_ESM.xlsx]

## Sheet: Sheet1
Additional file 6. The 42 potentially novel driver genes.
Genes
ACTB
ARAP1
C1QBP
CDK2
CEP72
COPS5
CUL1
CUL7
GTF2F1
HDAC1
HDAC6
HNRNPM
IFI16
IQCB1
KAT2B
MAP4
MAPK3
MED23
PTPN5
RBPJ
RELA
RPA1
RPS26
SH3KBP1
SNW1
SVIL
SYNPO
TBP
UBB
YWHAZ
DCN
FN1
HDAC2
HLA-B
HLA-C
IGF2
IGF2R
KPNB1
PCNA
PHB
PRKDC
XRCC5
