# Supplementary material for: Exploring gene-patient association to identify personalized cancer driver genes by linear neighborhood propagation
Source: BMC Bioinformatics. 2024 Jan 22;25:34. doi: 10.1186/s12859-024-05662-4 (PMC10804660; doi:10.1186/s12859-024-05662-4)
Supplement: Supplementary file 7 — Additional file 7: The categorized genes identified by LPDriver. [file 12859_2024_5662_MOESM7_ESM.xlsx]

## Sheet: direct driver gene
gene name	reference
ACTB	Guo C, Liu S, Wang J, Sun MZ, Greenaway FT. ACTB in cancer. Clin Chim Acta. 2013 Feb 18;417:39-44. doi: 10.1016/j.cca.2012.12.012. Epub 2012 Dec 22. PMID: 23266771.
KAT2B	Hirano G, Izumi H, Kidani A, Yasuniwa Y, Han B, Kusaba H, Akashi K, Kuwano M, Kohno K. Enhanced expression of PCAF endows apoptosis resistance in cisplatin-resistant cells. Mol Cancer Res. 2010 Jun;8(6):864-72. doi: 10.1158/1541-7786.MCR-09-0458. Epub 2010 Jun 8. PMID: 20530585.
CDK2	Flores O, Wang Z, Knudsen KE, Burnstein KL. Nuclear targeting of cyclin-dependent kinase 2 reveals essential roles of cyclin-dependent kinase 2 localization and cyclin E in vitamin D-mediated growth inhibition. Endocrinology. 2010 Mar;151(3):896-908. doi: 10.1210/en.2009-1116. Epub 2010 Feb 10. PMID: 20147522; PMCID: PMC2840684.
SNW1	Sato N, Maeda M, Sugiyama M, Ito S, Hyodo T, Masuda A, Tsunoda N, Kokuryo T, Hamaguchi M, Nagino M, Senga T. Inhibition of SNW1 association with spliceosomal proteins promotes apoptosis in breast cancer cells. Cancer Med. 2015 Feb;4(2):268-77. doi: 10.1002/cam4.366. Epub 2014 Dec 1. PMID: 25450007; PMCID: PMC4329010.
SH3KBP1	Nam JM, Onodera Y, Mazaki Y, Miyoshi H, Hashimoto S, Sabe H. CIN85, a Cbl-interacting protein, is a component of AMAP1-mediated breast cancer invasion machinery. EMBO J. 2007 Feb 7;26(3):647-56. doi: 10.1038/sj.emboj.7601534. Epub 2007 Jan 25. PMID: 17255943; PMCID: PMC1794391.
MED23	Shi J, Liu H, Yao F, Zhong C, Zhao H. Upregulation of mediator MED23 in non-small-cell lung cancer promotes the growth, migration, and metastasis of cancer cells. Tumour Biol. 2014 Dec;35(12):12005-13. doi: 10.1007/s13277-014-2499-3. Epub 2014 Oct 2. PMID: 25273169.
GSK3B	Chen L, Zuo Y, Pan R, Ye Z, Wei K, Xia S, Li W, Tan J, Xia X. GSK-3β Regulates the Expression of P21 to Promote the Progression of Chordoma. Cancer Manag Res. 2021 Jan 11;13:201-214. doi: 10.2147/CMAR.S289883. PMID: 33469364; PMCID: PMC7810826.
NES	Szymańska-Chabowska A, Świątkowski F, Jankowska-Polańska B, Mazur G, Chabowski M. Nestin Expression as a Diagnostic and Prognostic Marker in Colorectal Cancer and Other Tumors. Clin Med Insights Oncol. 2021 Aug 18;15:11795549211038256. doi: 10.1177/11795549211038256. PMID: 34421318; PMCID: PMC8377314.
PTK2	Wörthmüller J, Rüegg C. The Crosstalk between FAK and Wnt Signaling Pathways in Cancer and Its Therapeutic Implication. Int J Mol Sci. 2020 Nov 30;21(23):9107. doi: 10.3390/ijms21239107. PMID: 33266025; PMCID: PMC7730291.
SIN3A	Ellison-Zelski SJ, Alarid ET. Maximum growth and survival of estrogen receptor-alpha positive breast cancer cells requires the Sin3A transcriptional repressor. Mol Cancer. 2010 Sep 29;9:263. doi: 10.1186/1476-4598-9-263. PMID: 20920219; PMCID: PMC2956731.
SP1	Malsy M, Graf B, Almstedt K. The active role of the transcription factor Sp1 in NFATc2-mediated gene regulation in pancreatic cancer. BMC Biochem. 2019 Jan 29;20(1):2. doi: 10.1186/s12858-019-0105-4. PMID: 30696421; PMCID: PMC6352339.
SQSTM1	Tang J, Li Y, Xia S, Li J, Yang Q, Ding K, Zhang H. Sequestosome 1/p62: A multitasker in the regulation of malignant tumor aggression (Review). Int J Oncol. 2021 Oct;59(4):77. doi: 10.3892/ijo.2021.5257. Epub 2021 Aug 20. PMID: 34414460; PMCID: PMC8425587.
XRCC6	Zhou LP, Luan H, Dong XH, Jin GJ, Man DL, Shang H. Association between XRCC5, 6 and 7 gene polymorphisms and the risk of breast cancer: a HuGE review and meta-analysis. Asian Pac J Cancer Prev. 2012;13(8):3637-43. doi: 10.7314/apjcp.2012.13.8.3637. PMID: 23098447.

## Sheet: induced driver gene
gene name	reference
RBPJ	Liu MJ, Guo H, Jiang LL, Jiao M, Wang SH, Tian T, Fu X, Wang WJ. Elevated RBP-Jκ and CXCL11 Expression in Colon Cancer is Associated with an Unfavorable Clinical Outcome. Cancer Manag Res. 2021 May 5;13:3651-3661. doi: 10.2147/CMAR.S298580. PMID: 33981164; PMCID: PMC8107007.
HNRNPM	Bjersand K, Seidal T, Sundström-Poromaa I, Åkerud H, Skirnisdottir I. The clinical and prognostic correlation of HRNPM and SLC1A5 in pathogenesis and prognosis in epithelial ovarian cancer. PLoS One. 2017 Jun 13;12(6):e0179363. doi: 10.1371/journal.pone.0179363. PMID: 28609484; PMCID: PMC5469483.
CDK2	Xu L, Wang C, Wen Z, Yao X, Liu Z, Li Q, Wu Z, Xu Z, Liang Y, Ren T. Selective up-regulation of CDK2 is critical for TLR9 signaling stimulated proliferation of human lung cancer cell. Immunol Lett. 2010 Jan 4;127(2):93-9. doi: 10.1016/j.imlet.2009.10.002. Epub 2009 Oct 23. PMID: 19854217.
SH3KBP1	Samoylenko A, Vynnytska-Myronovska B, Byts N, Kozlova N, Basaraba O, Pasichnyk G, Palyvoda K, Bobak Y, Barska M, Mayevska O, Rzhepetsky Y, Shuvayeva H, Lyzogubov V, Usenko V, Savran V, Volodko N, Buchman V, Kietzmann T, Drobot L. Increased levels of the HER1 adaptor protein Rukl/CIN85 contribute to breast cancer malignancy. Carcinogenesis. 2012 Oct;33(10):1976-84. doi: 10.1093/carcin/bgs228. Epub…
SIN3A	Suzuki H, Ouchida M, Yamamoto H, Yano M, Toyooka S, Aoe M, Shimizu N, Date H, Shimizu K. Decreased expression of the SIN3A gene, a candidate tumor suppressor located at the prevalent allelic loss region 15q23 in non-small cell lung cancer. Lung Cancer. 2008 Jan;59(1):24-31. doi: 10.1016/j.lungcan.2007.08.002. Epub 2007 Sep 12. PMID: 17854949.
SP1	Huang C, Xie K. Crosstalk of Sp1 and Stat3 signaling in pancreatic cancer pathogenesis. Cytokine Growth Factor Rev. 2012 Feb-Apr;23(1-2):25-35. doi: 10.1016/j.cytogfr.2012.01.003. Epub 2012 Feb 16. PMID: 22342309; PMCID: PMC3307878.

## Sheet: target driver gene
gene name	reference
RBPJ	Nagao H, Setoguchi T, Kitamoto S, Ishidou Y, Nagano S, Yokouchi M, Abematsu M, Kawabata N, Maeda S, Yonezawa S, Komiya S. RBPJ is a novel target for rhabdomyosarcoma therapy. PLoS One. 2012;7(7):e39268. doi: 10.1371/journal.pone.0039268. Epub 2012 Jul 9. PMID: 22792167; PMCID: PMC3392254.
KAT2B	Wang T, Yao W, Shao Y, Zheng R, Huang F. PCAF fine-tunes hepatic metabolic syndrome, inflammatory disease, and cancer. J Cell Mol Med. 2018 Dec;22(12):5787-5800. doi: 10.1111/jcmm.13877. Epub 2018 Sep 14. PMID: 30216660; PMCID: PMC6237576.
CDK2	Peng C, Zeng W, Su J, Kuang Y, He Y, Zhao S, Zhang J, Ma W, Bode AM, Dong Z, Chen X. Cyclin-dependent kinase 2 (CDK2) is a key mediator for EGF-induced cell transformation mediated through the ELK4/c-Fos signaling pathway. Oncogene. 2016 Mar 3;35(9):1170-9. doi: 10.1038/onc.2015.175. Epub 2015 Jun 1. PMID: 26028036; PMCID: PMC4666830.
SNW1	Liu X, Ni Q, Xu J, Sheng C, Wang Q, Chen J, Yang S, Wang H. Expression and prognostic role of SKIP in human breast carcinoma. J Mol Histol. 2014 Apr;45(2):169-80. doi: 10.1007/s10735-013-9546-z. Epub 2013 Oct 23. PMID: 24150787.
SH3KBP1	Song H, Wang Y, Shi C, Lu J, Yuan T, Wang X. SH3KBP1 Promotes Glioblastoma Tumorigenesis by Activating EGFR Signaling. Front Oncol. 2021 Feb 11;10:583984. doi: 10.3389/fonc.2020.583984. PMID: 33643898; PMCID: PMC7905166.
C1QBP	Peerschke E, Stier K, Li X, Kandov E, de Stanchina E, Chang Q, Xiong Y, Manova-Todorova K, Fan N, Barlas A, Ghebrehiwet B, Adusumilli PS. gC1qR/HABP1/p32 Is a Potential New Therapeutic Target Against Mesothelioma. Front Oncol. 2020 Aug 12;10:1413. doi: 10.3389/fonc.2020.01413. PMID: 32903438; PMCID: PMC7435067.
MED23	Guo Y, Wang J, Li H, Liu W, Chen D, Zhao K, Liang X, Zhang Q, Yang Y, Chen G. Mediator subunit 23 overexpression as a novel target for suppressing proliferation and tumorigenesis in hepatocellular carcinoma. J Gastroenterol Hepatol. 2015 Jun;30(6):1094-103. doi: 10.1111/jgh.12923. PMID: 25684393.
GSK3B	Verbeke S, Perret R, Chaire V, Richard E, Velasco V, Giles F, Cavalcante L, Italiano A. GSK3-beta as a candidate therapeutic target in soft tissue sarcomas. J Hematol Oncol. 2021 Dec 2;14(1):202. doi: 10.1186/s13045-021-01215-x. PMID: 34857030; PMCID: PMC8641200.
NES	Zhang X, Xing C, Guan W, Chen L, Guo K, Yu A, Xie K. Clinicopathological and prognostic significance of nestin expression in patients with breast cancer: a systematic review and meta-analysis. Cancer Cell Int. 2020 May 14;20:169. doi: 10.1186/s12935-020-01252-5. PMID: 32467665; PMCID: PMC7227264.

## Sheet: biomarker driver gene
gene name	reference
ACTB	Ju Q, Li XM, Zhang H, Zhao YJ. BRCA1-Associated Protein Is a Potential Prognostic Biomarker and Is Correlated With Immune Infiltration in Liver Hepatocellular Carcinoma: A Pan-Cancer Analysis. Front Mol Biosci. 2020 Nov 2;7:573619. doi: 10.3389/fmolb.2020.573619. PMID: 33240929; PMCID: PMC7667264.
HNRNPM	Chen S, Zhang J, Duan L, Zhang Y, Li C, Liu D, Ouyang C, Lu F, Liu X. Identification of HnRNP M as a novel biomarker for colorectal carcinoma by quantitative proteomics. Am J Physiol Gastrointest Liver Physiol. 2014 Mar 1;306(5):G394-403. doi: 10.1152/ajpgi.00328.2013. Epub 2013 Dec 31. PMID: 24381081.
CDK2	Horiuchi D, Huskey NE, Kusdra L, Wohlbold L, Merrick KA, Zhang C, Creasman KJ, Shokat KM, Fisher RP, Goga A. Chemical-genetic analysis of cyclin dependent kinase 2 function reveals an important role in cellular transformation by multiple oncogenic pathways. Proc Natl Acad Sci U S A. 2012 Apr 24;109(17):E1019-27. doi: 10.1073/pnas.1111317109. Epub 2012 Apr 3. PMID: 22474407; PMCID: PMC3340028.
RPA1	Zhang Y, Yu C. Distinct expression and prognostic values of the replication protein A family in gastric cancer. Oncol Lett. 2020 Mar;19(3):1831-1841. doi: 10.3892/ol.2020.11253. Epub 2020 Jan 7. PMID: 32194677; PMCID: PMC7038973.
